# Supplementary material for: Ruthenium-catalyzed N-alkylation of amino-1,3,5-triazines using alcohols
Source: Royal Society of Chemistry journal article supplement (doi:10.1039/d1nj03116c), 2021-01-01

## Supporting Information

For

### Ruthenium catalyzed *N*-alkylation of amino-1,3,5-triazines using alcohols

Junna Zhao, Pengzhen Zhong, Zhongpao Xie, Wei Zhou, Chen Zhang, and Dong-Mei Cui

**General Methods.** Unless otherwise noted, materials were obtained from commercial suppliers and used without further purification. All reactions were performed in a heating mantle in a sealed tube otherwise noted. Thin layer chromatography (TLC) was performed using silica gel 60 F254 and visualized using UV light. Column chromatography was performed with silica gel (mesh 300-400). <sup>1</sup>H NMR and <sup>13</sup>C NMR spectra were recorded on a Bruker Avance 500 MHz or 600 MHz spectrometer in CDCl<sub>3</sub> with Me<sub>4</sub>Si as an internal standard. Data were reported as follows: chemical shift in ppm ( $\delta$ ), multiplicity (s = singlet, d = doublet, t = triplet, q = quartet, br = broad, and m = multiplet), coupling constant in hertz (Hz) and integration. IR spectra were recorded on an FT-IR spectrometer, and only major peaks are reported in cm<sup>-1</sup>. HRMS and mass data were recorded by ESI on a TOF mass spectrometer.

**General procedure for the synthesis of 3.** To a Schlenk tube were added 1,3,5-triazine **1** (0.5 mmol), alcohol **2** (1.5 mmol), *t*-BuOK (1.0 mmol), dioxane (2 mL), and RuCl<sub>2</sub>(PPh<sub>3</sub>)<sub>3</sub> (0.01 mmol). The mixture was stirred at 120 °C (oil bath) under N<sub>2</sub>. After completion, the mixture was cooled to room temperature, water was added to the mixture and extracted with EtOAc (3 x 20 mL). The organic phase was dried over anhydrous Na<sub>2</sub>SO<sub>4</sub>. The mixture was evaporated under vacuum, and the residue was purified by flash chromatography with petroleum ether and EtOAc as the eluent to give the pure product **3**.

**General procedure for the synthesis of 4.** To a Schlenk tube were added 1,3,5-triazine **4** (0.5 mmol), alcohol **2** (1.5 mmol), *t*-BuOK (1.0 mmol), dioxane (2 mL), and Ru(PPh<sub>3</sub>)<sub>3</sub>Cl<sub>2</sub> (0.015 mmol). The mixture was stirred at 120 °C (oil bath) under N<sub>2</sub>. After completion, the mixture was cooled to room temperature, water was added to the mixture and extracted with EtOAc (3 x 20 mL). The organic phase was dried over anhydrous Na<sub>2</sub>SO<sub>4</sub>. The mixture was evaporated under

vacuum, and the residue was purified by flash chromatography with petroleum ether and EtOAc as the eluent to give the pure product **4**.

**Table 3-SI** Optimization of the reaction conditions

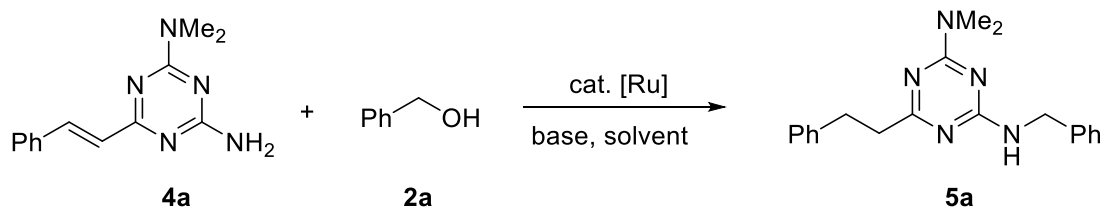

| Entry             | Catalyst                                             | Base           | Time (h) | Temp. (°C) | Solvent | Yield (%) <sup>a</sup> |
|-------------------|------------------------------------------------------|----------------|----------|------------|---------|------------------------|
| 1                 | RuCl <sub>2</sub> (PPh <sub>3</sub> ) <sub>3</sub>   | <i>t</i> -BuOK | 24       | 120        | dioxane | 54                     |
| 2                 | RuCl <sub>2</sub> (PPh <sub>3</sub> ) <sub>3</sub>   | <i>t</i> -BuOK | 24       | 160        | dioxane | 58                     |
| 3                 | Ru <sub>3</sub> (CO) <sub>12</sub>                   | <i>t</i> -BuOK | 24       | 160        | dioxane | 25                     |
| 4                 | [Ru( <i>p</i> -cymene)Cl <sub>2</sub> ] <sub>2</sub> | <i>t</i> -BuOK | 24       | 160        | dioxane | 44                     |
| 5 <sup>b</sup>    | RuCl <sub>2</sub> (PPh <sub>3</sub> ) <sub>3</sub>   | <i>t</i> -BuOK | 24       | 160        | dioxane | 54                     |
| 6 <sup>c</sup>    | RuCl <sub>2</sub> (PPh <sub>3</sub> ) <sub>3</sub>   | <i>t</i> -BuOK | 12       | 160        | dioxane | 85                     |
| 7 <sup>c</sup>    | RuCl <sub>2</sub> (PPh <sub>3</sub> ) <sub>3</sub>   | <i>t</i> -BuOK | 7        | 160        | dioxane | 45                     |
| 8 <sup>c</sup>    | RuCl <sub>2</sub> (PPh <sub>3</sub> ) <sub>3</sub>   | <i>t</i> -BuOK | 12       | 120        | dioxane | 88                     |
| 9 <sup>c</sup>    | RuCl <sub>2</sub> (PPh <sub>3</sub> ) <sub>3</sub>   | <i>t</i> -BuOK | 12       | 100        | dioxane | 25                     |
| 10 <sup>c,d</sup> | RuCl <sub>2</sub> (PPh <sub>3</sub> ) <sub>3</sub>   | <i>t</i> -BuOK | 12       | 120        | dioxane | 75                     |
| 11 <sup>c</sup>   | RuCl <sub>2</sub> (PPh <sub>3</sub> ) <sub>3</sub>   | <i>t</i> -BuOK | 12       | reflux     | THF     | 28                     |
| 12 <sup>c</sup>   | RuCl <sub>2</sub> (PPh <sub>3</sub> ) <sub>3</sub>   | <i>t</i> -BuOK | 12       | 120        | MeCN    | trace                  |
| 13 <sup>c</sup>   | RuCl <sub>2</sub> (PPh <sub>3</sub> ) <sub>3</sub>   | <i>t</i> -BuOK | 12       | 120        | toluene | 84                     |
| 14 <sup>c</sup>   | RuCl <sub>2</sub> (PPh <sub>3</sub> ) <sub>3</sub>   | NaH            | 12       | 120        | dioxane | 56                     |
| 15 <sup>c</sup>   | RuCl <sub>2</sub> (PPh <sub>3</sub> ) <sub>3</sub>   | KOH            | 12       | 120        | dioxane | 66                     |

<sup>[a]</sup> Reaction conditions: **4a** (0.5 mmol), **2a** (1.5 mmol), catalyst (2 mol%), base (1.0 mmol), solvent (2 mL), under N<sub>2</sub>; isolated yields are shown. <sup>[b]</sup> **2a** (2.0 mmol). <sup>[c]</sup> RuCl<sub>2</sub>(PPh<sub>3</sub>)<sub>3</sub> (3 mol%). <sup>[d]</sup> *t*-BuOK (1.5 mmol).

**N<sup>2</sup>-benzyl-N<sup>4</sup>,N<sup>4</sup>-dimethyl-1,3,5-triazine-2,4-diamine (3a)**

white solid, 107.4 mg, yield: 93%; Mp: 143-144 °C; <sup>1</sup>H NMR (500 MHz, CDCl<sub>3</sub>) δ 8.01 (s, 1H), 7.34-7.31 (m, 4H), 7.29-7.26 (m, 1H), 6.00 (br, 1H), 4.61 (d, *J* = 5.2 Hz, 2H), 3.15 (s, 3H), 3.12 (s, 3H); <sup>13</sup>C NMR (125 MHz, CDCl<sub>3</sub>) δ 165.15, 164.84, 164.62, 138.93, 128.58, 127.57, 127.28, 44.63, 36.26, 36.05. IR (KBr, cm<sup>-1</sup>): 3449, 3232, 1554, 1507, 1433, 1406, 1189, 1093, 813. HRMS (ESI) *m/z* [M+H]<sup>+</sup> calcd for C<sub>12</sub>H<sub>16</sub>N<sub>5</sub> 230.1406, found 230.1364.

**N<sup>2</sup>,N<sup>2</sup>-dimethyl-N<sup>4</sup>-(3-methylbenzyl)-1,3,5-triazine-2,4-diamine (3b)**: white solid, 122.7 mg, 99%; mp: 121-123 °C; <sup>1</sup>H NMR (500 MHz, CDCl<sub>3</sub>) δ 7.97 (s, 1H), 7.23 (t, *J* = 7.5 Hz, 1H),

7.13-7.15 (m, 2H), 7.09 (s, 1H), 6.21 (br, 1H), 4.57 (d,  $J = 5.2$  Hz, 2H), 3.15 (s, 6H), 2.35 (s, 3H);  $^{13}\text{C}$  NMR (125 MHz,  $\text{CDCl}_3$ )  $\delta$  165.08, 164.75, 164.56, 138.81, 138.19, 128.45, 128.34, 128.00, 124.65, 44.52, 36.24, 36.03, 21.39. IR (KBr,  $\text{cm}^{-1}$ ): 3441, 3229, 1605, 1574, 1507, 1405, 1364. HRMS (ESI)  $m/z$   $[\text{M}+\text{H}]^+$  calcd for  $\text{C}_{13}\text{H}_{18}\text{N}_5$  244.1562, found 244.1560.

***N*<sup>2</sup>,*N*<sup>2</sup>-dimethyl-*N*<sup>4</sup>-(4-methylbenzyl)-1,3,5-triazine-2,4-diamine (3c)**: white solid, 122.0 mg, 99%; mp: 172-173 °C;  $^1\text{H}$  NMR (500 MHz,  $\text{CDCl}_3$ )  $\delta$  7.96 (s, 1H), 7.25 (d,  $J = 7.8$  Hz, 2H), 7.14 (d,  $J = 7.8$  Hz, 2H), 6.31 (br, 1H), 4.55 (d,  $J = 5.6$  Hz, 2H), 3.14 (s, 3H), 3.07 (s, 3H), 2.34 (s, 3H);  $^{13}\text{C}$  NMR (125 MHz,  $\text{CDCl}_3$ )  $\delta$  165.05, 164.73, 164.55, 136.86, 135.87, 129.21, 127.57, 44.30, 36.21, 36.04, 21.08. IR (KBr,  $\text{cm}^{-1}$ ): 3448, 3236, 1587, 1558, 1508, 1403, 811. HRMS (ESI)  $m/z$   $[\text{M}+\text{H}]^+$  calcd for  $\text{C}_{13}\text{H}_{18}\text{N}_5$  244.1562, found 244.1555.

***N*<sup>2</sup>-(4-methoxybenzyl)-*N*<sup>4</sup>,*N*<sup>4</sup>-dimethyl-1,3,5-triazine-2,4-diamine (3d)**: white solid, 121.7 mg, 94%; mp: 144-146 °C;  $^1\text{H}$  NMR (500 MHz,  $\text{CDCl}_3$ )  $\delta$  7.97 (s, 1H), 7.26 (d,  $J = 8.65$  Hz, 2H), 6.86 (d,  $J = 8.65$  Hz, 2H), 6.16 (br, 1H), 4.52 (d,  $J = 5.4$  Hz, 2H), 3.80 (s, 3H), 3.10 (s, 6H);  $^{13}\text{C}$  NMR (125 MHz,  $\text{CDCl}_3$ )  $\delta$  164.97, 164.63, 164.52, 158.81, 131.00, 128.89, 113.90, 55.24, 43.99, 36.20, 36.02. IR (KBr,  $\text{cm}^{-1}$ ): 3448, 3230, 3003, 1605, 1583, 1558, 1400, 1247, 1179, 985, 809. HRMS (ESI)  $m/z$   $[\text{M}+\text{H}]^+$  calcd for  $\text{C}_{13}\text{H}_{18}\text{N}_5\text{O}$  260.1511, found 260.1489.

***N*<sup>2</sup>-(4-chlorobenzyl)-*N*<sup>4</sup>,*N*<sup>4</sup>-dimethyl-1,3,5-triazine-2,4-diamine (3e)**: white solid, 85.50 mg, 64%; mp: 142-144 °C;  $^1\text{H}$  NMR (500 MHz,  $\text{CDCl}_3$ )  $\delta$  8.11 (s, 1H), 7.30 (d,  $J = 8.6$  Hz, 2H), 7.26 (d,  $J = 8.6$  Hz, 2H), 6.37 (br, 1H), 4.56 (d,  $J = 5.5$  Hz, 2H), 3.14 (s, 3H), 3.09 (s, 3H);  $^{13}\text{C}$  NMR (125 MHz,  $\text{CDCl}_3$ )  $\delta$  165.00, 164.71, 164.45, 137.57, 132.90, 128.82, 128.63, 43.87, 36.27, 36.05. IR (KBr,  $\text{cm}^{-1}$ ): 3454, 3228, 1582, 1551, 1503, 1403, 985, 808. HRMS (ESI)  $m/z$   $[\text{M}+\text{H}]^+$  calcd for  $\text{C}_{12}\text{H}_{15}\text{ClN}_5$  264.1016, found 264.1019.

***N*<sup>2</sup>-(4-fluorobenzyl)-*N*<sup>4</sup>,*N*<sup>4</sup>-dimethyl-1,3,5-triazine-2,4-diamine (3f)**: yellow solid, 67.60 mg, 54%; mp: 149-150 °C;  $^1\text{H}$  NMR (500 MHz,  $\text{CDCl}_3$ )  $\delta$  7.93 (s, 1H), 7.33-7.28 (m, 2H), 7.02-6.98 (m, 2H), 6.55 (br, 1H), 4.55 (d,  $J = 5.3$  Hz, 2H), 3.14 (s, 3H), 3.11 (s, 3H);  $^{13}\text{C}$  NMR (125 MHz,  $\text{CDCl}_3$ )  $\delta$  164.96, 164.68, 164.49, 162.01 (d,  $J = 243.3$  Hz), 134.76, 129.17 (d,  $J = 7.9$  Hz), 115.33 (d,  $J = 21.3$  Hz), 43.84, 36.24, 36.01. IR (KBr,  $\text{cm}^{-1}$ ): 3456, 3225, 1597, 1582, 1505, 1406, 1222, 814. HRMS (ESI)  $m/z$   $[\text{M}+\text{H}]^+$  calcd for  $\text{C}_{12}\text{H}_{15}\text{FN}_5$  248.1311, found 248.1328.

***N*<sup>2</sup>,*N*<sup>2</sup>-dimethyl-*N*<sup>4</sup>-(3-(trifluoromethyl)benzyl)-1,3,5-triazine-2,4-diamine (3g)**: white solid, 136.5 mg, 91%; mp: 108-112 °C;  $^1\text{H}$  NMR (500 MHz,  $\text{CDCl}_3$ )  $\delta$  7.98 (s, 1H), 7.61 (s, 1H), 7.52 (d,

$J = 7.6$  Hz, 2H), 7.47-7.41 (m, 1H), 6.63 (br, 1H), 4.60-4.79 (m, 2H), 3.14 (s, 3H), 3.08 (s, 3H);  $^{13}\text{C}$  NMR (125 MHz,  $\text{CDCl}_3$ )  $\delta$  165.18, 164.92, 164.57, 140.19, 130.80, 130.79, 129.01(q,  $J = 3.5$  Hz), 124.43 (q,  $J = 33.4$  Hz), 124.11 (q,  $J = 270.5$  Hz), 124.08 (q,  $J = 4.1$  Hz), 37.58, 36.23, 36.02. IR (KBr,  $\text{cm}^{-1}$ ): 3451, 3255, 1613, 1581, 1558, 1505, 1402, 1110, 809. HRMS (ESI)  $m/z$   $[\text{M}+\text{H}]^+$  calcd for  $\text{C}_{13}\text{H}_{15}\text{F}_3\text{N}_5$  298.1280, found 298.1251.

***N*<sup>2</sup>-(furan-2-ylmethyl)-*N*<sup>4</sup>,*N*<sup>4</sup>-dimethyl-1,3,5-triazine-2,4-diamine (3h)**: white solid, 49.30 mg, 45%; mp: 138-139 °C;  $^1\text{H}$  NMR (500 MHz,  $\text{CDCl}_3$ )  $\delta$  8.00 (s, 1H), 7.36 (d,  $J = 1.9$  Hz, 1H), 6.53 (br, 1H), 6.32 (dd,  $J = 3.0, 1.9$  Hz, 1H), 6.24 (d,  $J = 3.0$  Hz, 1H), 4.59 (d,  $J = 5.0$  Hz, 2H), 3.15 (s, 6H);  $^{13}\text{C}$  NMR (125 MHz,  $\text{CDCl}_3$ )  $\delta$  165.52, 165.00, 164.46, 152.06, 142.01, 110.33, 107.05, 37.58, 36.23, 36.02; IR (KBr,  $\text{cm}^{-1}$ ): 3460, 3238, 1587, 1499, 1434, 1406, 1334, 812. HRMS (ESI)  $m/z$   $[\text{M}+\text{H}]^+$  calcd for  $\text{C}_{10}\text{H}_{14}\text{N}_5\text{O}$  220.1198, found 220.1203.

***N*<sup>2</sup>,*N*<sup>2</sup>-dimethyl-*N*<sup>4</sup>-(thiophen-2-ylmethyl)-1,3,5-triazine-2,4-diamine (3i)**: yellow solid, 86.00 mg, 73%; mp: 145-147 °C;  $^1\text{H}$  NMR (500 MHz,  $\text{CDCl}_3$ )  $\delta$  7.94 (s, 1H), 7.21 (dd,  $J = 5.1, 1.1$  Hz, 1H), 7.00 (dd,  $J = 3.5, 1.1$  Hz, 1H), 6.95 (dd,  $J = 5.1, 3.5$  Hz, 1H), 6.65 (br, 1H), 4.75 (d,  $J = 5.4$  Hz, 2H), 3.12 (s, 6H);  $^{13}\text{C}$  NMR (125 MHz,  $\text{CDCl}_3$ )  $\delta$  165.08, 164.49, 164.44, 141.82, 126.67, 125.64, 124.94, 39.37, 36.28, 36.13. IR (KBr,  $\text{cm}^{-1}$ ): 3465, 3233, 1602, 1578, 1504, 1432, 1190, 812, 707. HRMS (ESI)  $m/z$   $[\text{M}+\text{H}]^+$  calcd for  $\text{C}_{10}\text{H}_{14}\text{N}_5\text{S}$  236.0970, found 236.0994.

***N*<sup>2</sup>,*N*<sup>2</sup>-dimethyl-*N*<sup>4</sup>-(pyridin-3-ylmethyl)-1,3,5-triazine-2,4-diamine (3j)**: yellow solid, 89.70 mg, 77%; mp: 156-158 °C;  $^1\text{H}$  NMR (500 MHz,  $\text{CDCl}_3$ )  $\delta$  8.60 (s, 1H), 8.50 (d,  $J = 4.8$  Hz, 1H), 7.95 (s, 1H), 7.65 (d,  $J = 7.8$  Hz, 1H), 7.24 (dd,  $J = 7.8, 4.8$  Hz, 1H), 6.76 (br, 1H), 4.66-4.50 (m, 2H), 3.13 (s, 3H), 3.07 (s, 3H);  $^{13}\text{C}$  NMR (125 MHz,  $\text{CDCl}_3$ )  $\delta$  164.90, 164.68, 164.41, 149.24, 148.63, 135.14, 134.60, 123.41, 42.11, 36.25, 36.04. IR (KBr,  $\text{cm}^{-1}$ ): 3465, 3245, 1616, 1584, 1557, 1402, 1371, 810. HRMS (ESI)  $m/z$   $[\text{M}+\text{H}]^+$  calcd for  $\text{C}_{11}\text{H}_{15}\text{N}_6$  231.1358, found 231.1321.

***N*-benzyl-4-morpholino-1,3,5-triazin-2-amine (3k)**: white solid, 130.3 mg, 95%; mp: 149-150 °C;  $^1\text{H}$  NMR (500 MHz,  $\text{CDCl}_3$ )  $\delta$  7.98 (s, 1H), 7.37-7.31 (m, 4H), 7.30-7.29 (m, 1H), 6.07 (br, 1H), 4.58 (d,  $J = 4.4$  Hz, 2H), 3.80 (t,  $J = 4.9$  Hz, 4H), 3.71 (t,  $J = 4.9$  Hz, 4H);  $^{13}\text{C}$  NMR (125 MHz,  $\text{CDCl}_3$ )  $\delta$  165.34, 164.94, 164.05, 138.60, 128.60, 127.56, 127.36, 66.67, 44.64, 43.38. IR (KBr,  $\text{cm}^{-1}$ ): 3448, 3235, 2860, 1576, 1532, 1495, 1431, 1227, 1111, 814. HRMS (ESI)  $m/z$   $[\text{M}+\text{H}]^+$  calcd for  $\text{C}_{14}\text{H}_{18}\text{N}_5\text{O}$  272.1511, found 272.1501.

***N*<sup>2</sup>-benzyl-*N*<sup>4</sup>,*N*<sup>4</sup>-dimethyl-6-propyl-1,3,5-triazine-2,4-diamine (3l)**: white solid, 115.7 mg,

86%; mp: 82-84 °C; <sup>1</sup>H NMR (500 MHz, CDCl<sub>3</sub>) δ 7.36-7.30 (m, 4H), 7.29-7.23 (m, 1H), 5.68 (br, 1H), 4.62 (d, *J* = 5.6 Hz, 2H), 3.16 (s, 3H), 3.12 (s, 3H), 2.53-2.38 (m, 2H), 1.75 (m, 2H), 0.97 (t, *J* = 7.4 Hz, 3H); <sup>13</sup>C NMR (125 MHz, CDCl<sub>3</sub>) δ 177.70, 165.64, 165.38, 139.36, 128.44, 127.48, 127.07, 44.60, 40.88, 35.99, 20.96, 13.99. IR (KBr, cm<sup>-1</sup>): 3250, 2962, 1609, 1555, 1509, 1405, 1355, 1208. HRMS (ESI) *m/z* [M+H]<sup>+</sup> calcd for C<sub>15</sub>H<sub>22</sub>N<sub>5</sub> 272.1875, found 272.1894.

***N*<sup>2</sup>-benzyl-*N*<sup>4</sup>,*N*<sup>4</sup>-dimethyl-6-phenyl-1,3,5-triazine-2,4-diamine (3m)**: white solid, 149.6 mg, 96%; mp: 96-97 °C; <sup>1</sup>H NMR (500 MHz, CDCl<sub>3</sub>) δ 8.46-8.38 (m, 2H), 7.51-7.43 (m, 3H), 7.37-7.32 (m, 4H), 7.29-7.26 (m, 1H), 5.71 (br, 1H), 4.80-4.68 (m, 1H), 3.31 (s, 3H), 3.19 (s, 3H); <sup>13</sup>C NMR (125 MHz, CDCl<sub>3</sub>) δ 170.33, 166.18, 165.73, 139.33, 137.46, 131.04, 128.49, 128.17, 128.10, 127.63, 127.13, 44.80, 36.12. IR (KBr, cm<sup>-1</sup>): 3471, 3275, 2915, 1596, 1539, 1505, 1405, 981, 704. HRMS (ESI) *m/z* [M+H]<sup>+</sup> calcd for C<sub>18</sub>H<sub>20</sub>N<sub>5</sub> 306.1719, found 306.1718.

***N*<sup>2</sup>-benzyl-6-(3-methoxyphenyl)-*N*<sup>4</sup>,*N*<sup>4</sup>-dimethyl-1,3,5-triazine-2,4-diamine (3n)**: white solid, 155.0 mg, 93%; mp: 105-107 °C; <sup>1</sup>H NMR (500 MHz, CDCl<sub>3</sub>) δ 7.94-7.98 (m, 2H), 7.42-7.31 (m, 5H), 7.29-7.26 (m, 1H), 7.04 (t, *J* = 8.1 Hz, 1H), 5.58 (br, 1H), 4.78-4.68 (m, 2H), 3.89 (s, 3H), 3.30 (s, 3H), 3.19 (s, 3H); <sup>13</sup>C NMR (125 MHz, CDCl<sub>3</sub>) δ 170.17, 165.73, 159.54, 139.35, 138.96, 129.12, 128.53, 127.66, 127.19, 120.72, 117.29, 112.87, 55.32, 44.84, 36.13. IR (KBr, cm<sup>-1</sup>): 3264, 2913, 1602, 1541, 1507, 1406, 1046, 789. HRMS (ESI) *m/z* [M+H]<sup>+</sup> calcd for C<sub>19</sub>H<sub>22</sub>N<sub>5</sub>O 336.1824, found 336.1852.

***N*-benzyl-4,6-diphenyl-1,3,5-triazin-2-amine (3o)**: yellow oil, 143.9 mg, 85%; <sup>1</sup>H NMR (500 MHz, CDCl<sub>3</sub>) δ 8.67 (d, *J* = 7.2 Hz, 2H), 8.60 (d, *J* = 7.2 Hz, 2H), 7.63-7.53 (m, 6H), 7.41-7.40 (m, 2H), 7.39-7.34 (m, 2H), 7.34-7.28 (m, 1H), 6.21 (t, *J* = 5.9 Hz, 1H), 4.85 (d, *J* = 6.0 Hz, 2H); <sup>13</sup>C NMR (125 MHz, CDCl<sub>3</sub>) δ 171.57, 171.33, 166.52, 138.56, 136.74, 136.54, 131.95, 131.86, 128.78, 128.72, 128.58, 128.38, 127.73, 127.52, 45.07. IR (KBr, cm<sup>-1</sup>): 3421, 1590, 1536, 1495, 1416, 771. HRMS (ESI) *m/z* [M+H]<sup>+</sup> calcd for C<sub>22</sub>H<sub>19</sub>N<sub>4</sub> 339.1610, found 339.1616.

***N*<sup>2</sup>-benzyl-*N*<sup>4</sup>,*N*<sup>4</sup>-dimethyl-6-phenethyl-1,3,5-triazine-2,4-diamine (5a)**: white solid, 148.0 mg, 88%; mp: 85-86 °C (lit.<sup>1</sup> 88-89 °C); <sup>1</sup>H NMR (500 MHz, CDCl<sub>3</sub>) δ 7.37-7.30 (m, 4H), 7.30-7.24 (m, 5H), 7.23-7.17 (m, 1H), 5.70 (br, 1H), 4.64 (d, *J* = 5.0 Hz, 2H), 3.19 (s, 3H), 3.13 (s, 3H), 3.11-3.02 (m, 2H), 2.98-2.74 (m, 2H).

***N*<sup>2</sup>,*N*<sup>2</sup>-dimethyl-*N*<sup>4</sup>-(4-methylbenzyl)-6-phenethyl-1,3,5-triazine-2,4-diamine (5b)**: white solid, 148.3 mg, 84%; mp: 102-103 °C; <sup>1</sup>H NMR (500 MHz, CDCl<sub>3</sub>) δ 7.32-7.26 (m, 4H), 7.24 (d, *J* =

7.9 Hz, 2H), 7.22-7.17 (m, 1H), 7.15 (d,  $J = 7.9$  Hz, 2H), 5.55 (br, 1H), 4.59 (d,  $J = 5.0$  Hz, 2H), 3.16 (s, 6H), 3.11-3.01 (m, 2H), 2.91-2.77 (m, 2H), 2.36 (s, 3H);  $^{13}\text{C}$  NMR (125 MHz,  $\text{CDCl}_3$ )  $\delta$  176.70, 165.58, 165.38, 141.98, 136.74, 136.20, 129.15, 128.44, 128.24, 127.54, 125.73, 44.41, 40.25, 36.01, 33.34, 21.07. IR (KBr,  $\text{cm}^{-1}$ ): 3447, 3257, 1624, 1560, 1513, 1398, 1012, 810. HRMS (ESI)  $m/z$   $[\text{M}+\text{H}]^+$  calcd for  $\text{C}_{21}\text{H}_{26}\text{N}_5$  348.2188, found 348.2191.

***N*<sup>2</sup>-(4-methoxybenzyl)-*N*<sup>4</sup>,*N*<sup>4</sup>-dimethyl-6-phenethyl-1,3,5-triazine-2,4-diamine (5c)**: white solid, 152.1 mg, 83%; mp: 101-103 °C;  $^1\text{H}$  NMR (500 MHz,  $\text{CDCl}_3$ )  $\delta$  7.31-7.26 (m, 6H), 7.22-7.17 (m, 1H), 6.89-6.85 (m, 2H), 5.46 (br, 1H), 4.55 (d,  $J = 5.0$  Hz, 2H), 3.81 (s, 3H), 3.17 (s, 6H), 3.11-2.99 (m, 2H), 2.87-2.74 (m, 2H);  $^{13}\text{C}$  NMR (125 MHz,  $\text{CDCl}_3$ )  $\delta$  165.57, 165.55, 165.40, 158.82, 142.00, 131.34, 128.90, 128.45, 128.26, 125.75, 113.91, 55.28, 44.16, 40.27, 36.04, 33.37. IR (KBr,  $\text{cm}^{-1}$ ): 3462, 3250, 1617, 1556, 1509, 1400, 1246, 810. HRMS (ESI)  $m/z$   $[\text{M}+\text{H}]^+$  calcd for  $\text{C}_{21}\text{H}_{26}\text{N}_5\text{O}$  364.2137, found 364.2128.

***N*<sup>2</sup>-(4-bromobenzyl)-*N*<sup>4</sup>,*N*<sup>4</sup>-dimethyl-6-phenethyl-1,3,5-triazine-2,4-diamine (5d)**: white solid, 173.6 mg, 84%; mp: 148-149 °C;  $^1\text{H}$  NMR (500 MHz,  $\text{CDCl}_3$ )  $\delta$  7.44 (d,  $J = 8.4$  Hz, 2H), 7.31-7.23 (m, 4H), 7.23-7.15 (m, 3H), 5.62 (br, 1H), 4.57 (d,  $J = 4.9$  Hz, 2H), 3.17 (s, 3H), 3.09 (s, 3H), 3.07-3.05 (m, 2H), 2.88-2.76 (m, 2H);  $^{13}\text{C}$  NMR (125 MHz,  $\text{CDCl}_3$ )  $\delta$  176.86, 165.57, 165.33, 141.91, 138.45, 131.54, 129.20, 128.44, 128.28, 125.79, 120.90, 44.05, 40.22, 36.05, 33.30. IR (KBr,  $\text{cm}^{-1}$ ): 3249, 2917, 1609, 1557, 1506, 1399, 1009, 813. HRMS (ESI)  $m/z$   $[\text{M}+\text{H}]^+$  calcd for  $\text{C}_{20}\text{H}_{23}\text{BrN}_5$  412.1137, found 412.1139.

***N*<sup>2</sup>-benzyl-6-(4-methoxyphenethyl)-*N*<sup>4</sup>,*N*<sup>4</sup>-dimethyl-1,3,5-triazine-2,4-diamine (5e)**: white solid, 134.7 mg, 74%; mp: 124-126 °C (lit.<sup>1</sup> 113-115-89 °C);  $^1\text{H}$  NMR (600 MHz,  $\text{CDCl}_3$ )  $\delta$  7.38-7.30 (m, 4H), 7.28-7.21 (m, 1H), 7.17 (d,  $J = 8.5$  Hz, 2H), 6.81 (d,  $J = 8.5$  Hz, 2H), 5.35 (br, 1H), 4.62 (d,  $J = 4.0$  Hz, 2H), 3.78 (s, 3H), 3.16 (s, 3H), 3.11 (s, 3H), 2.99 (t,  $J = 7.9$  Hz, 2H), 2.83-2.65 (m, 2H).

***N*<sup>2</sup>-benzyl-6-(4-chlorophenethyl)-*N*<sup>4</sup>,*N*<sup>4</sup>-dimethyl-1,3,5-triazine-2,4-diamine (5f)**: white solid; 164.2 mg, 89%; mp: 104-105 °C (lit.<sup>1</sup> 109-110 °C);  $^1\text{H}$  NMR (500 MHz,  $\text{CDCl}_3$ )  $\delta$  7.34-7.30 (m 4H), 7.30-7.26 (m, 1H), 7.23 (d,  $J = 8.2$  Hz, 2H), 7.17 (d,  $J = 8.2$  Hz, 2H), 5.50 (br, 1H), 4.62 (d,  $J = 5.4$  Hz, 2H), 3.16 (s, 3H), 3.13 (s, 3H), 3.04 (t,  $J = 7.2$  Hz, 2H), 2.92-2.64 (m, 2H).

**(trifluoromethyl)phenethyl)-1,3,5-triazine-2,4-diamine (5g)**: white solid, 148.4 mg, 74%; mp: 93-94 °C;  $^1\text{H}$  NMR (500 MHz,  $\text{CDCl}_3$ )  $\delta$  7.63 (s,  $J = 7.9$  Hz, 1H), 7.47-7.42 (m, 1H), 7.40 (s,  $J =$

7.5 Hz, 1H), 7.37-7.30 (m, 4H), 7.30-7.24 (m, 2H), 5.66 (br, 1H), 4.64 (d,  $J = 5.9$  Hz, 1H), 3.33-3.22 (m, 2H), 3.15 (s, 6H), 2.94-2.76 (m, 2H);  $^{13}\text{C}$  NMR (125 MHz,  $\text{CDCl}_3$ )  $\delta$  176.20, 165.61, 165.32, 140.78, 139.27, 131.68, 130.78, 128.48 (q,  $J = 38.5$  Hz), 128.45 (q,  $J = 6.1$  Hz), 128.36, 127.74 (q,  $J = 259.5$  Hz), 127.63, 127.14, 125.82 (q,  $J = 5.7$  Hz), 44.65, 39.75, 36.07, 35.98, 29.60. IR (KBr,  $\text{cm}^{-1}$ ): 3446, 3259, 2945, 1603, 1557, 1515, 1408, 1117. HRMS (ESI)  $m/z$   $[\text{M}+\text{H}]^+$  calcd for  $\text{C}_{21}\text{H}_{23}\text{F}_3\text{N}_5$  402.1906, found 402.1915.

Ref.

1) Su, C. W.; Zeng, M.; Zhang, C.; Cui, D.-M. *Eur. J. Org. Chem.* **2020**, 4942-4949.

xzp180829-86 CDC13 0831

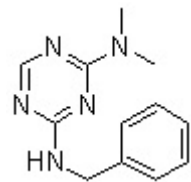

8.0097

7.3447  
7.3356  
7.2939  
7.2855  
7.2763  
7.2682

6.0008

4.6148  
4.6014

3.1496  
3.1236

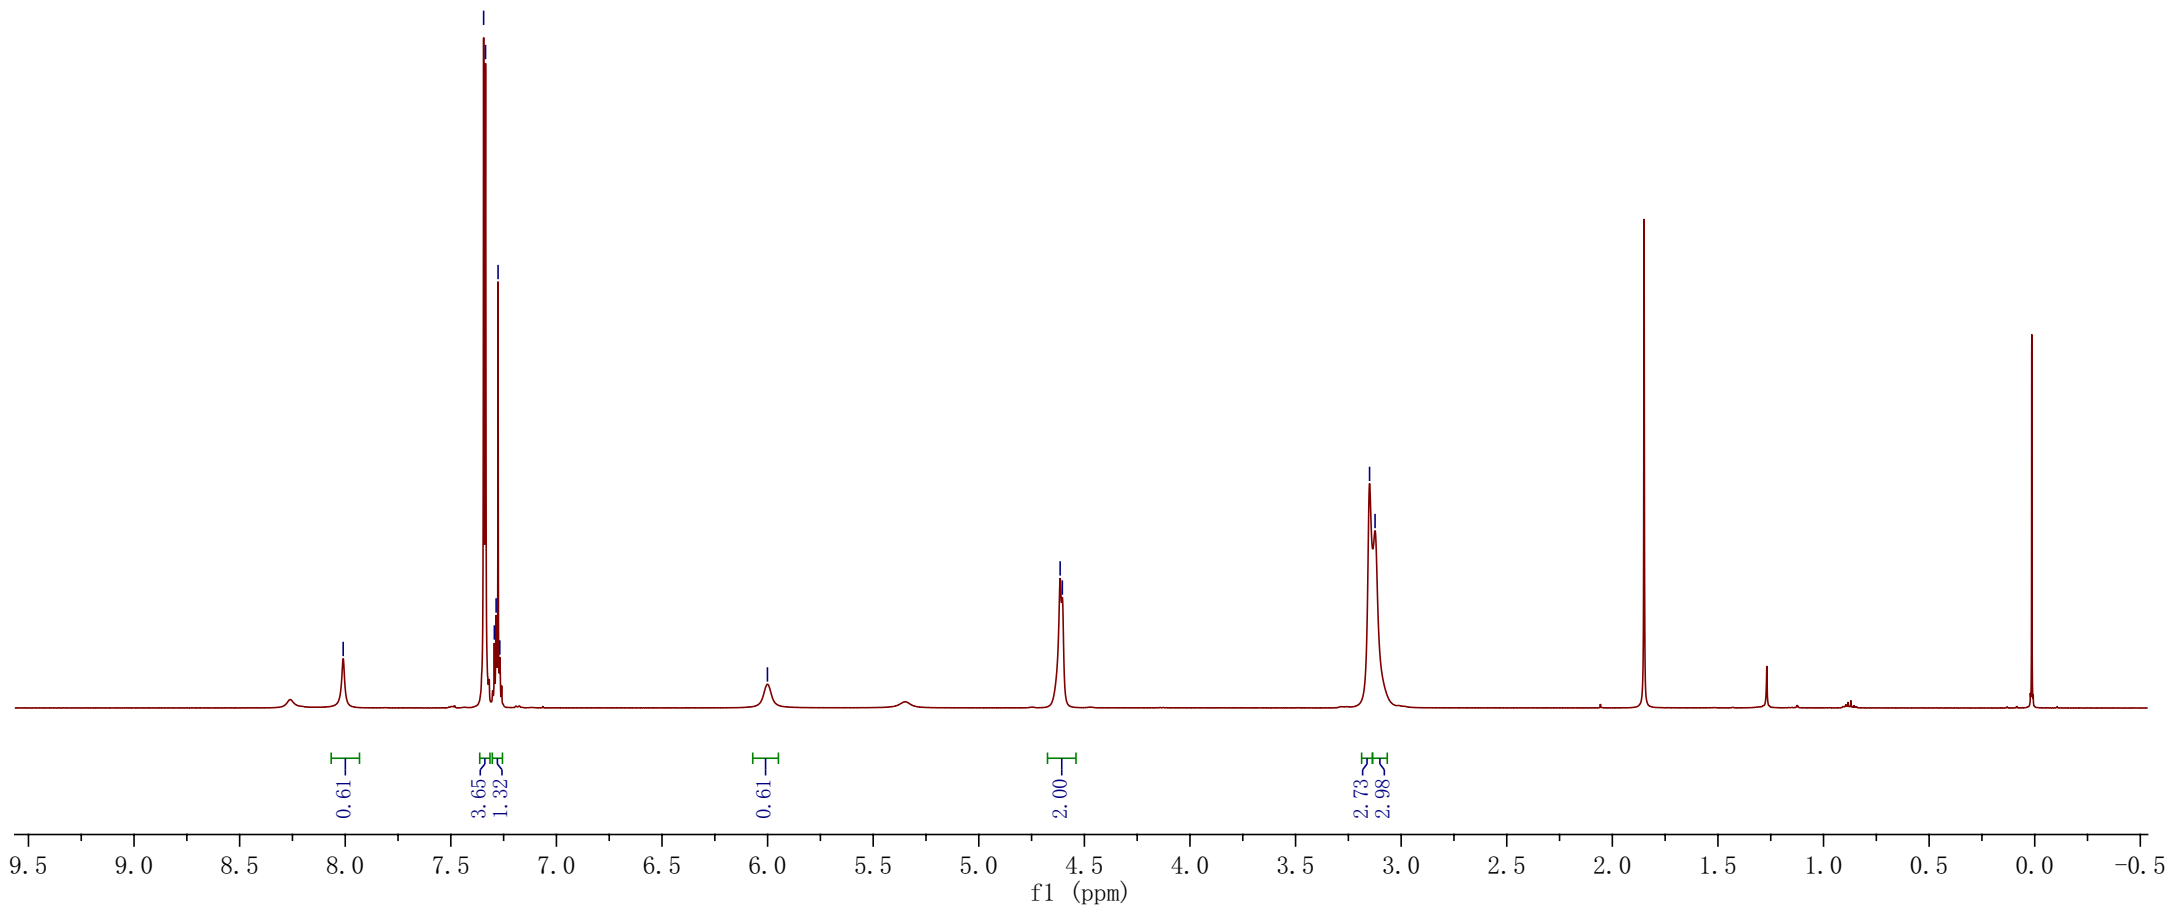



180903  
XZP-180829-86 0903

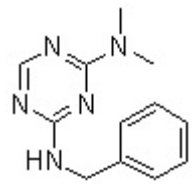

165.623  
164.333  
164.162

138.9295

128.5764  
127.5709  
127.2843

44.6274

36.2625  
36.0539

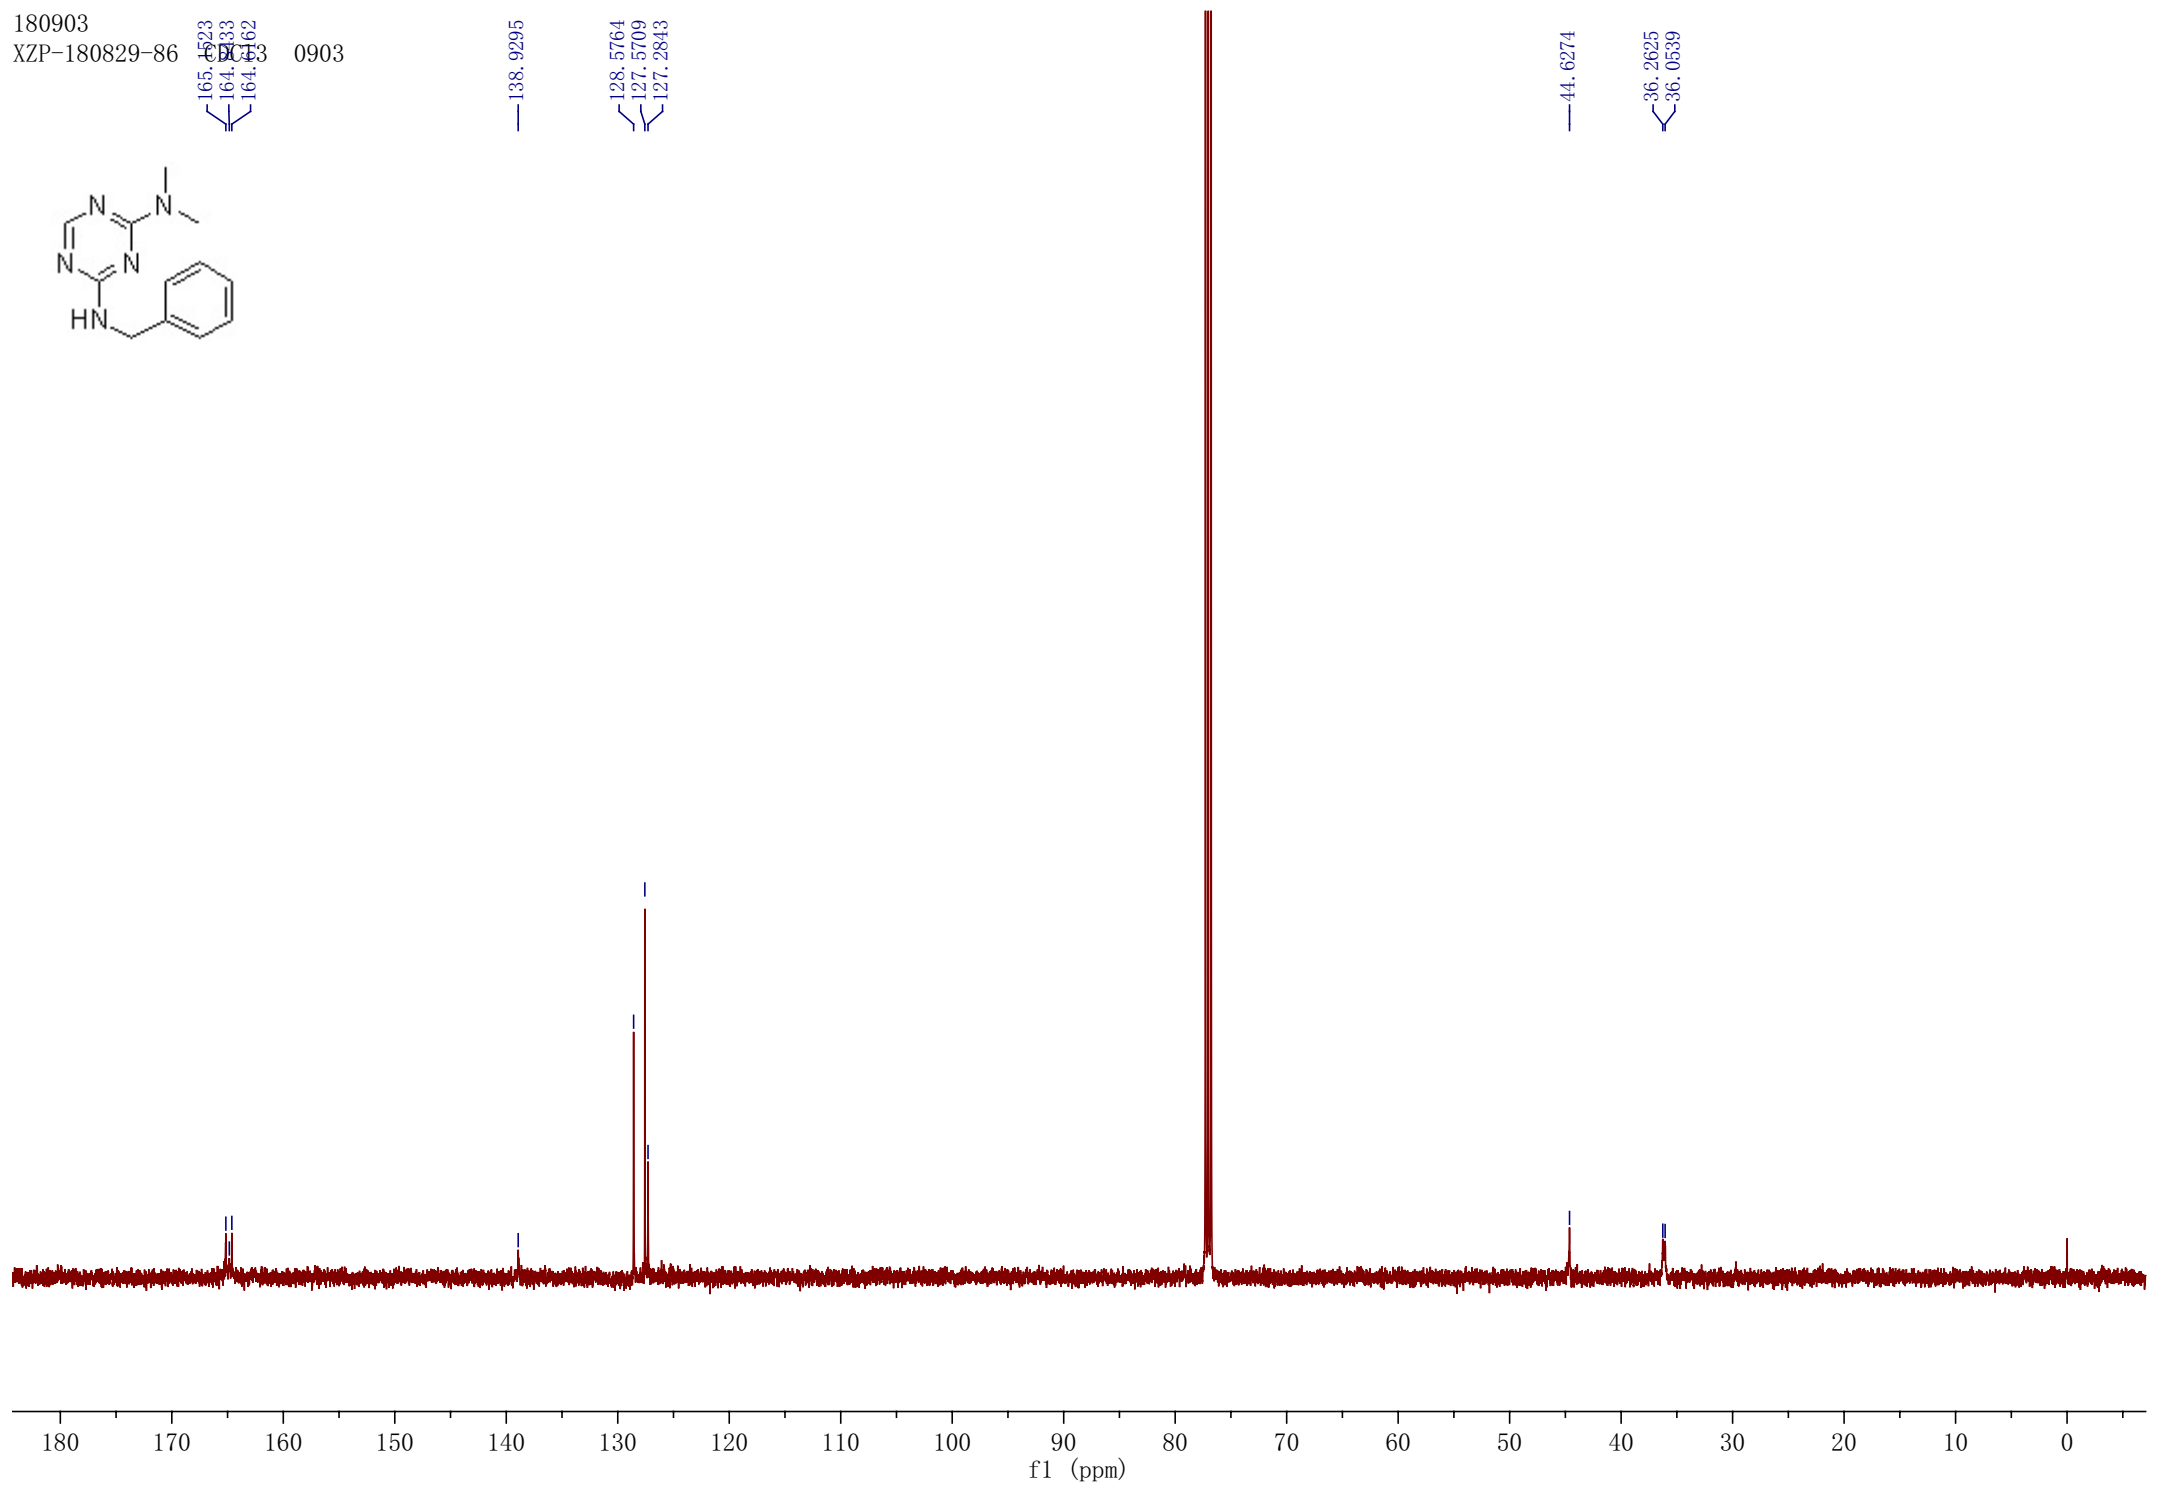

181126  
xzq181114-152

CDC13

6.2131

4.5731  
4.5626

3.1486

2.3451

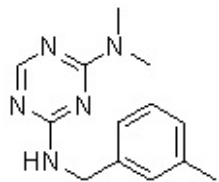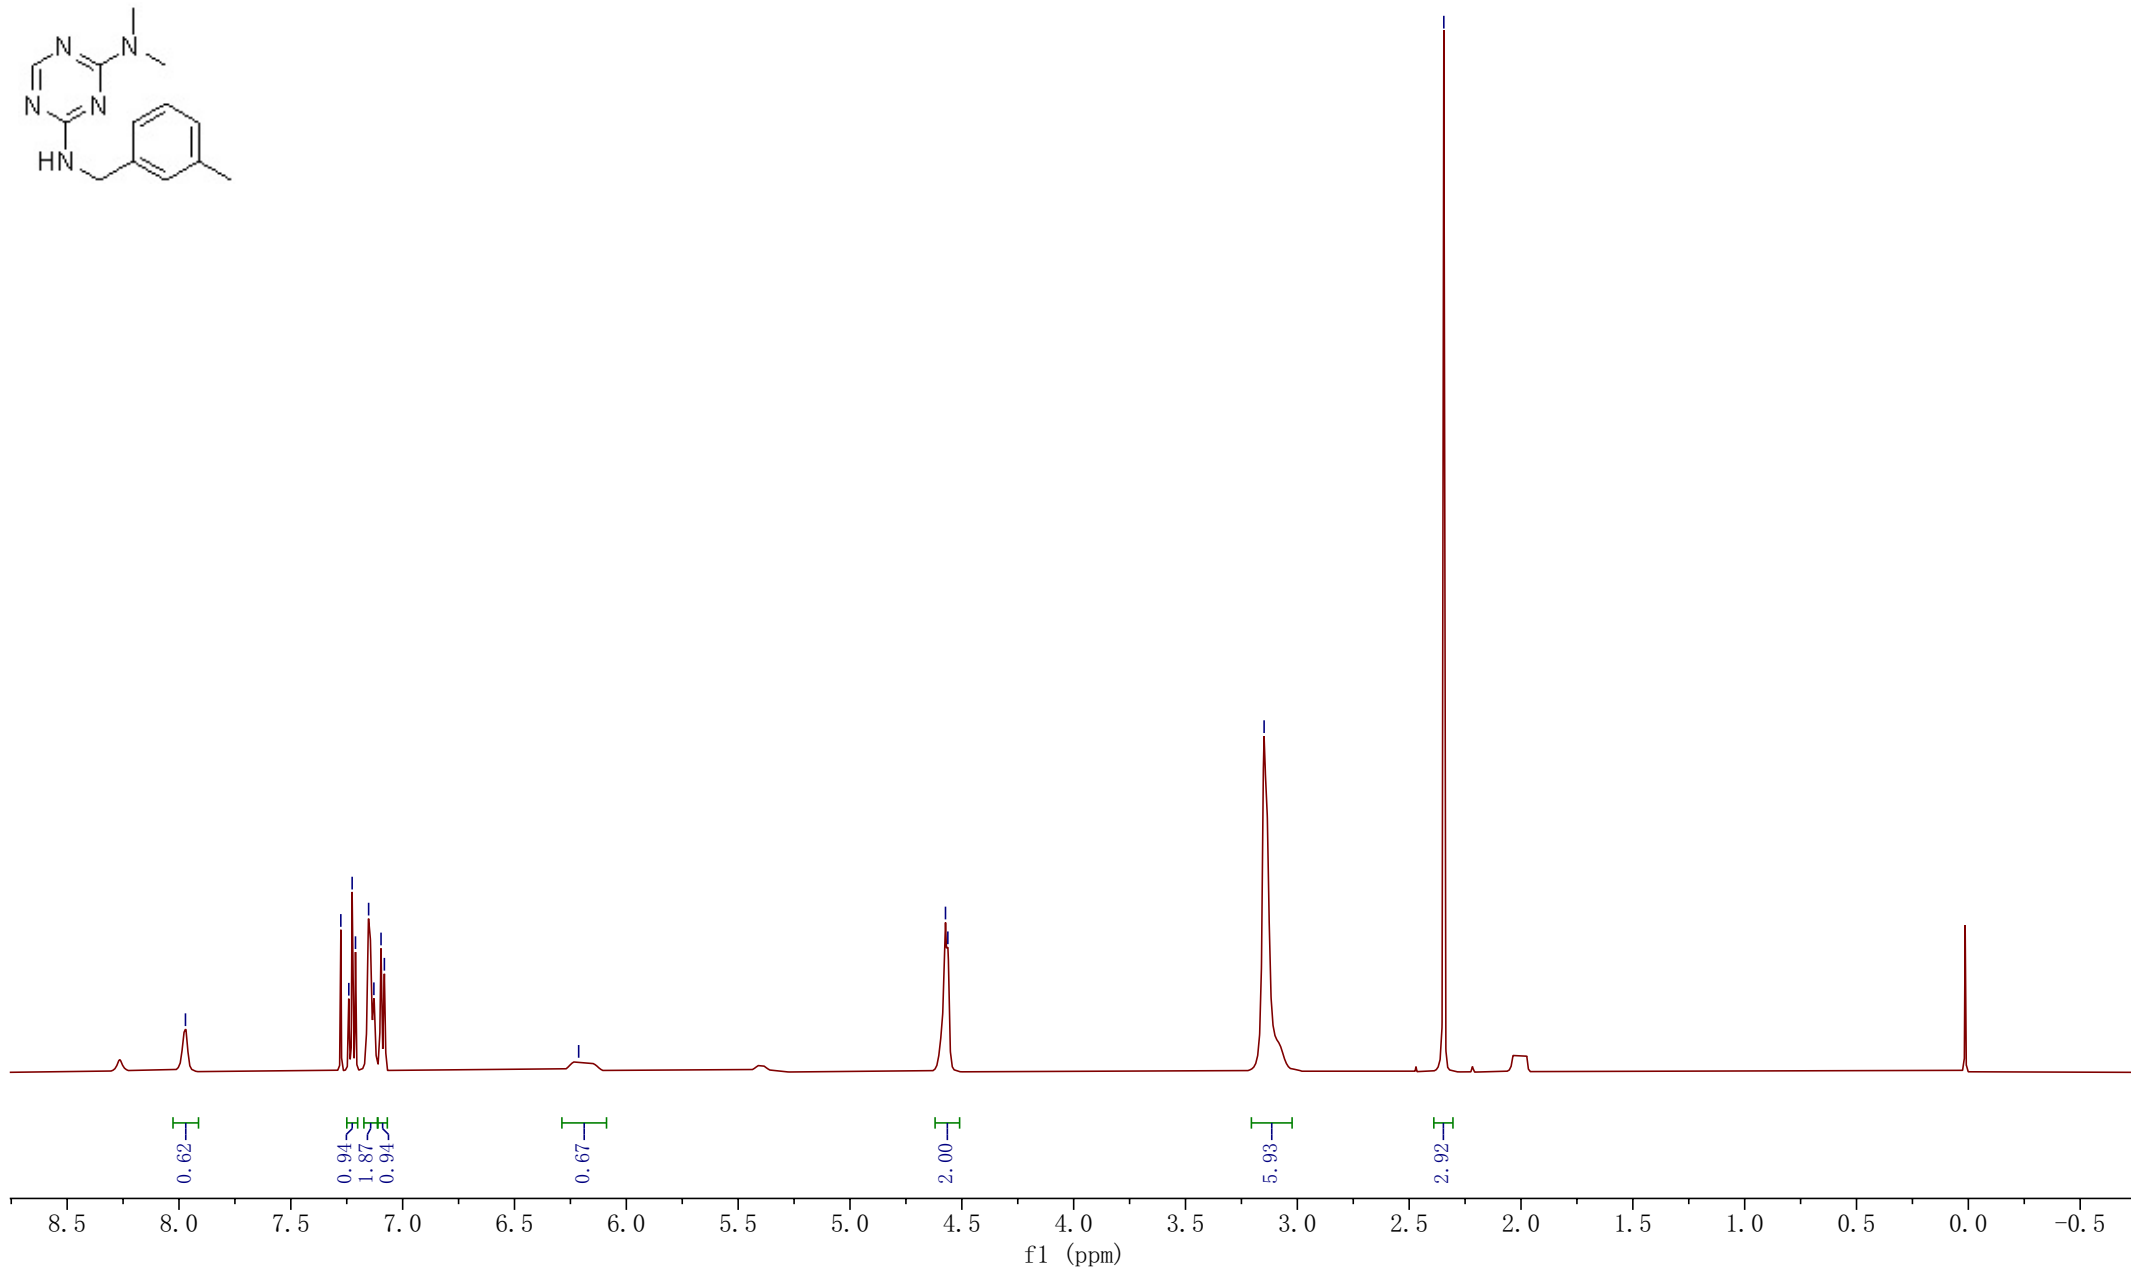

181210  
xzp181114-15  
CDC13 1210

165.801  
164.7509  
164.5687

138.8149  
138.1948

128.4461  
128.3442  
128.0010  
124.6512

44.5203

36.2392  
36.0331

21.3900

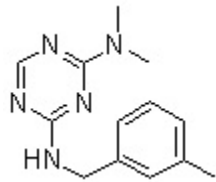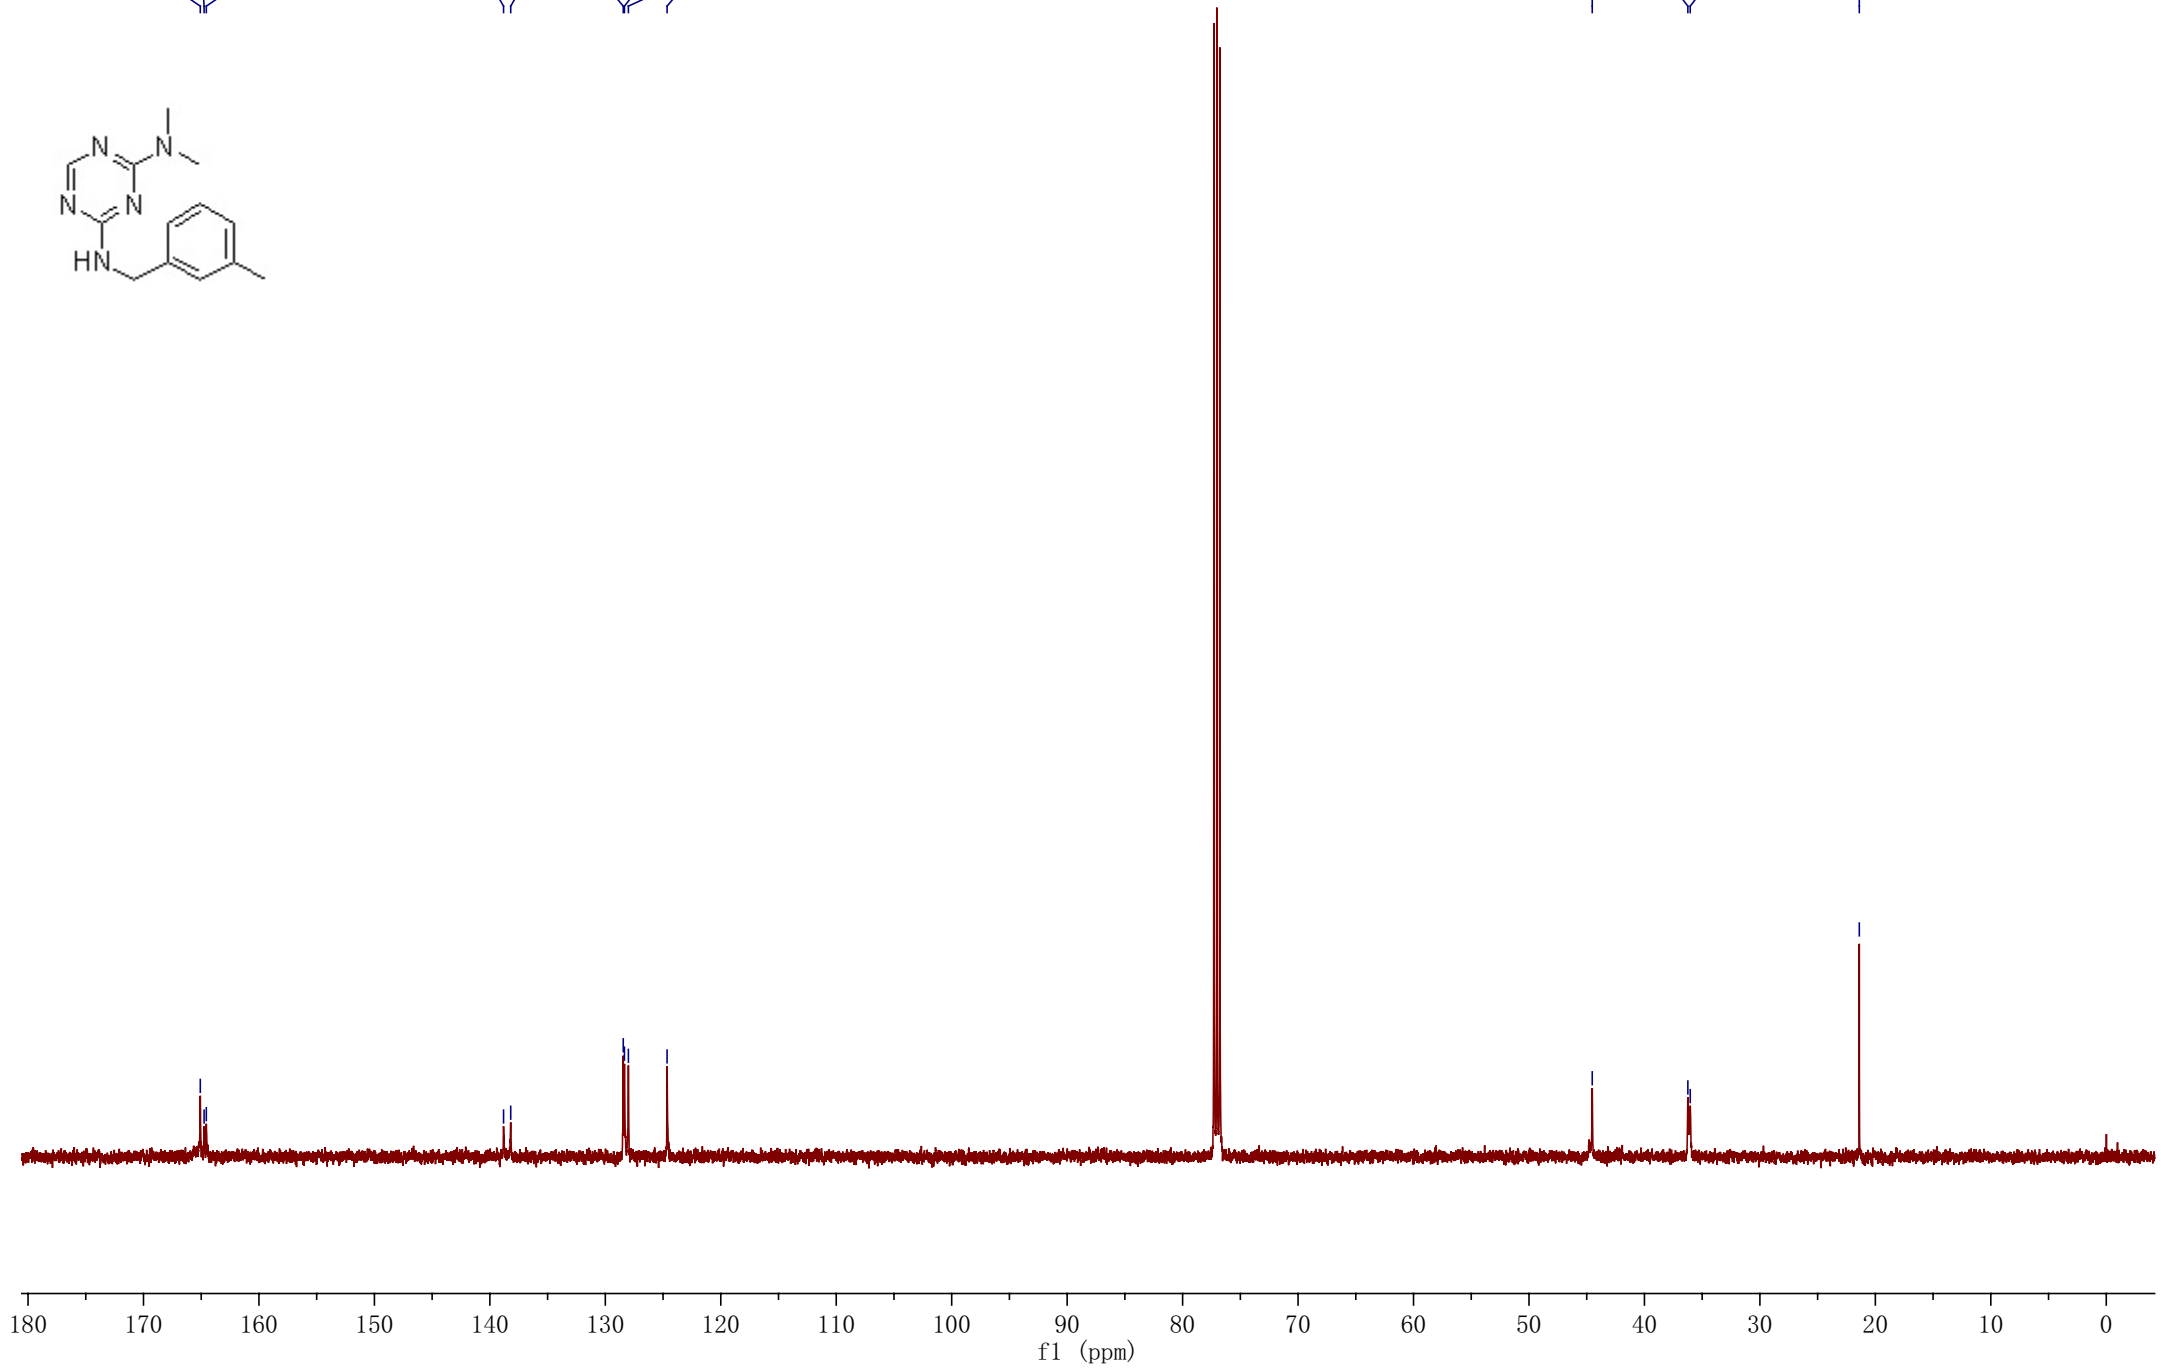

190102  
xzp181127-161 CDC 23 0102

7.2765  
7.2384  
7.2230  
7.1490  
7.1332

6.3091

4.5595  
4.5184

3.1440

2.3441

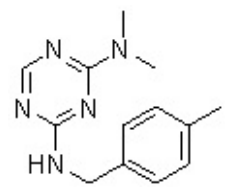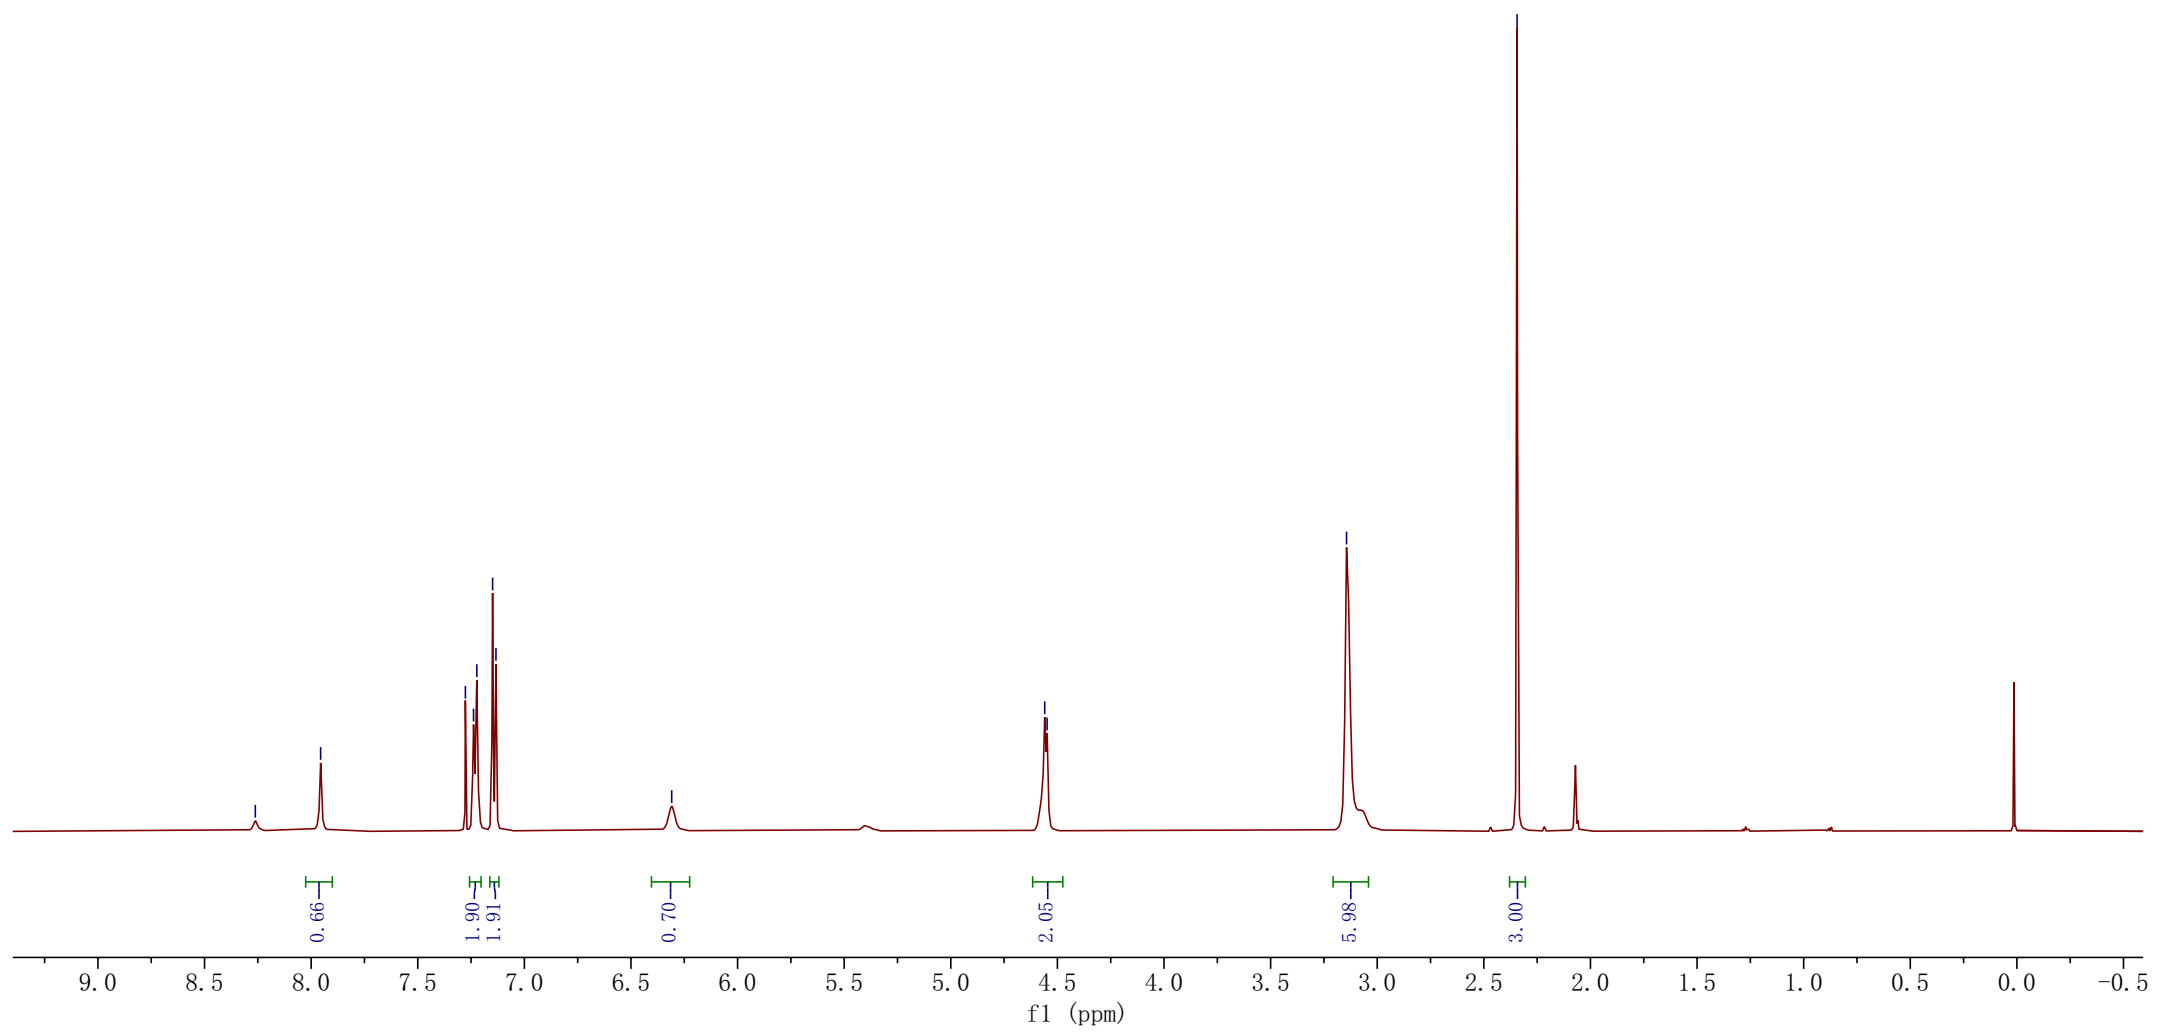

190115  
xzp181127-16  
165.889  
164.7282  
164.0330  
130.13  
0115

136.8579  
135.8713  
129.2056  
127.5715

44.3002

36.2084  
36.0371

21.0776

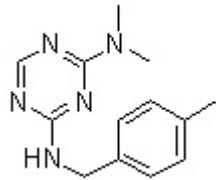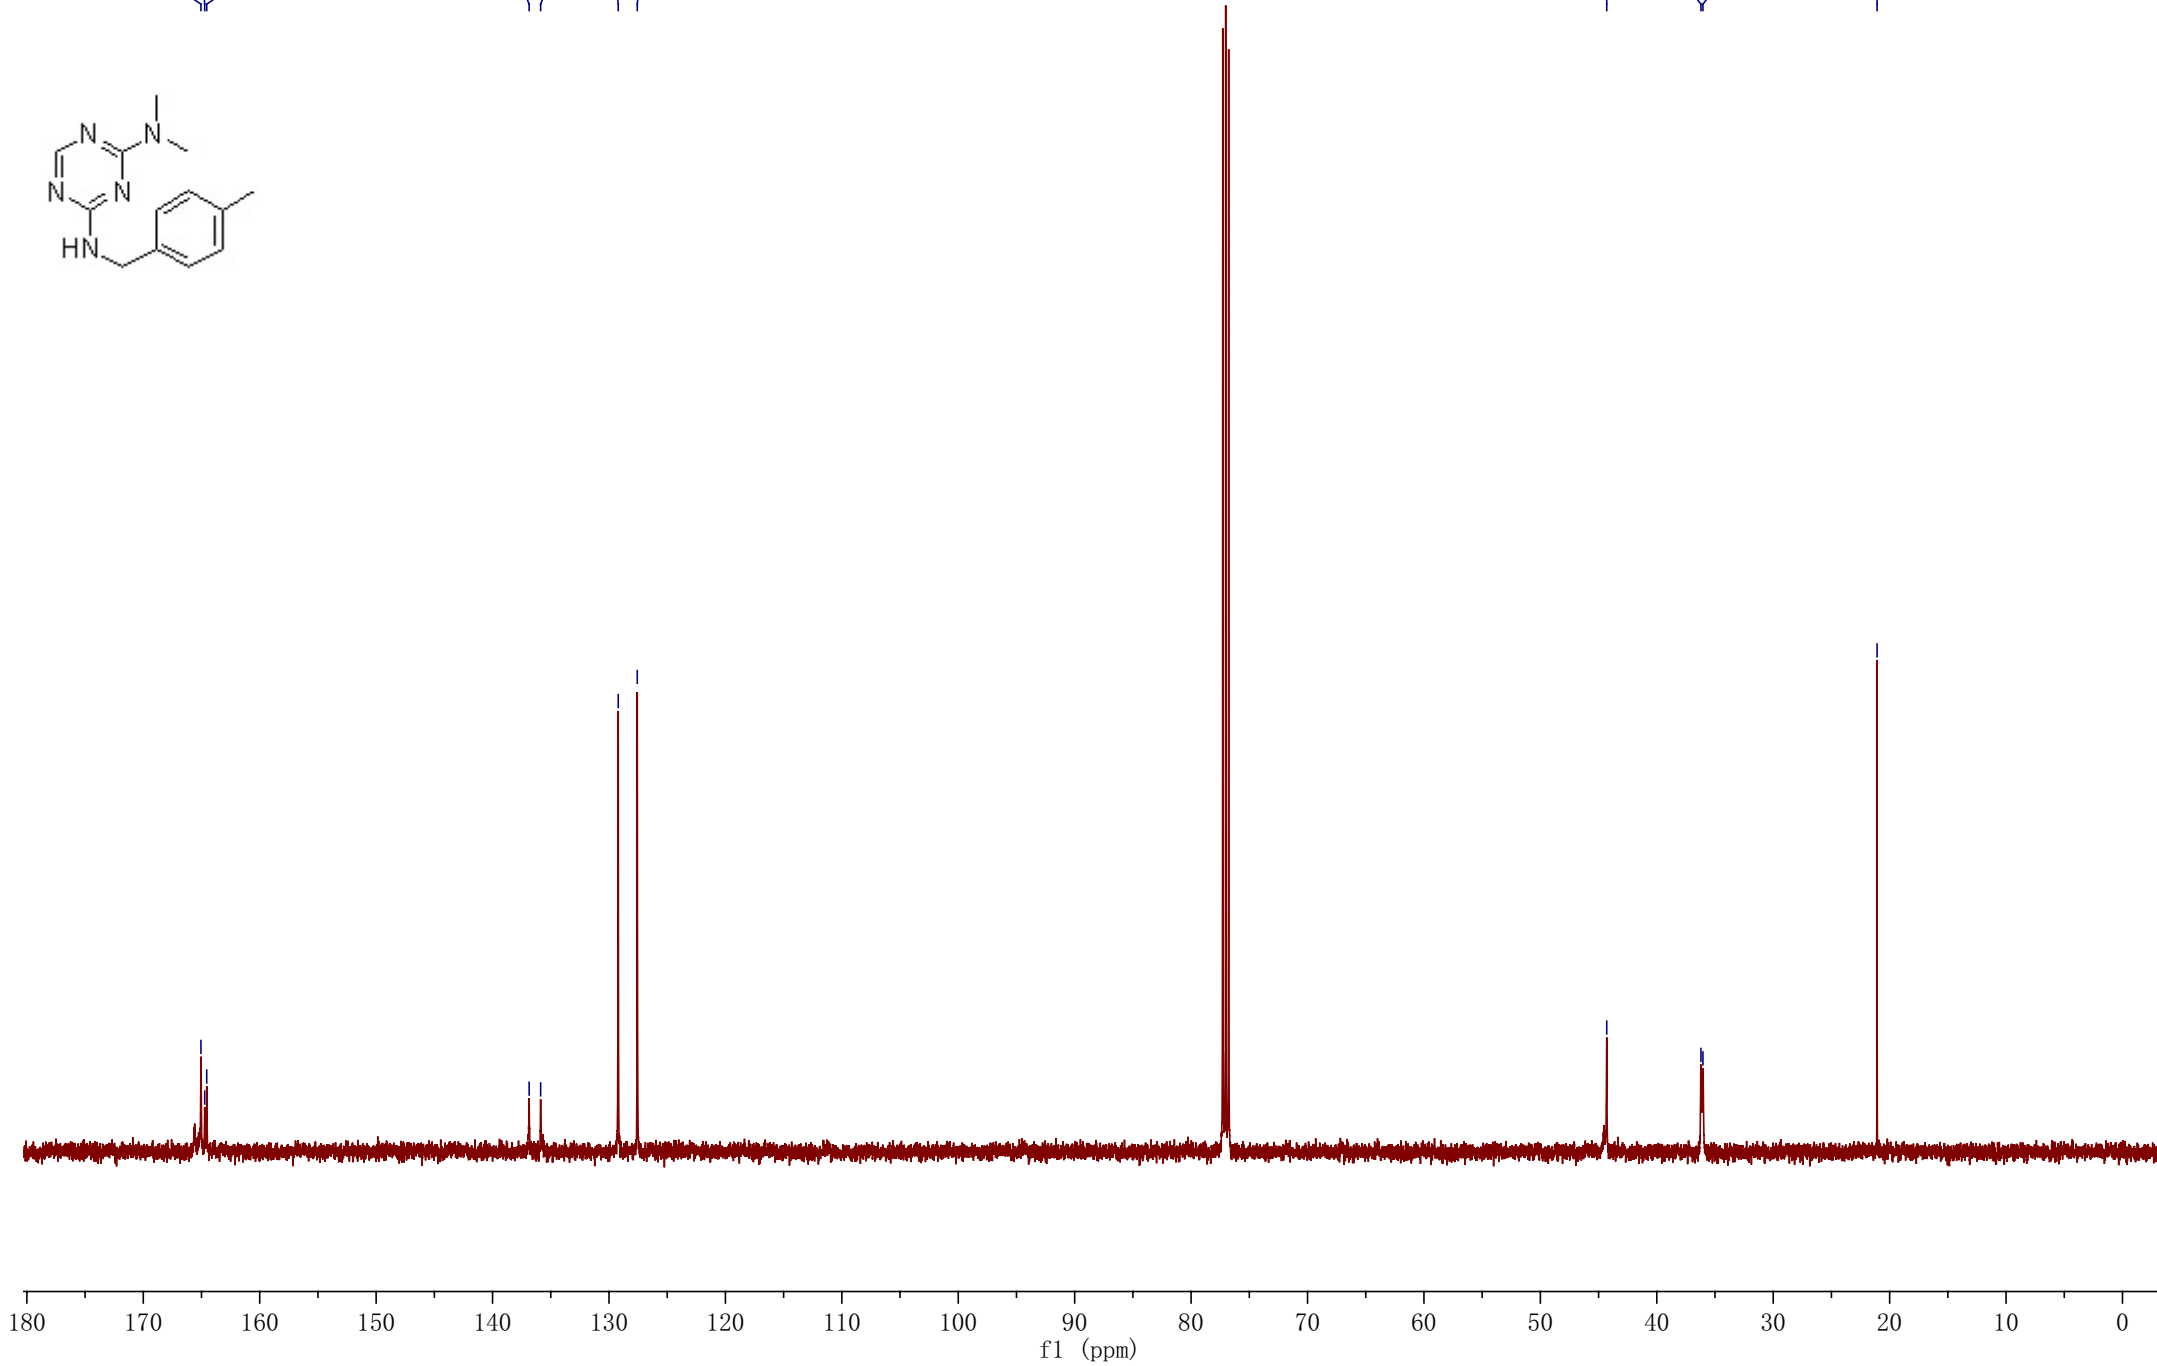

190107  
xzp181122-158 CDC13

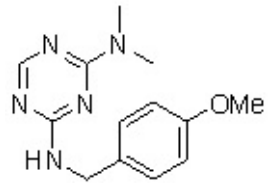

7.9503  
7.9107

7.2763  
7.2675  
7.2506

6.8728  
6.8688  
6.8594  
6.8555

6.1557

4.5286  
4.5177

3.8017

3.1441

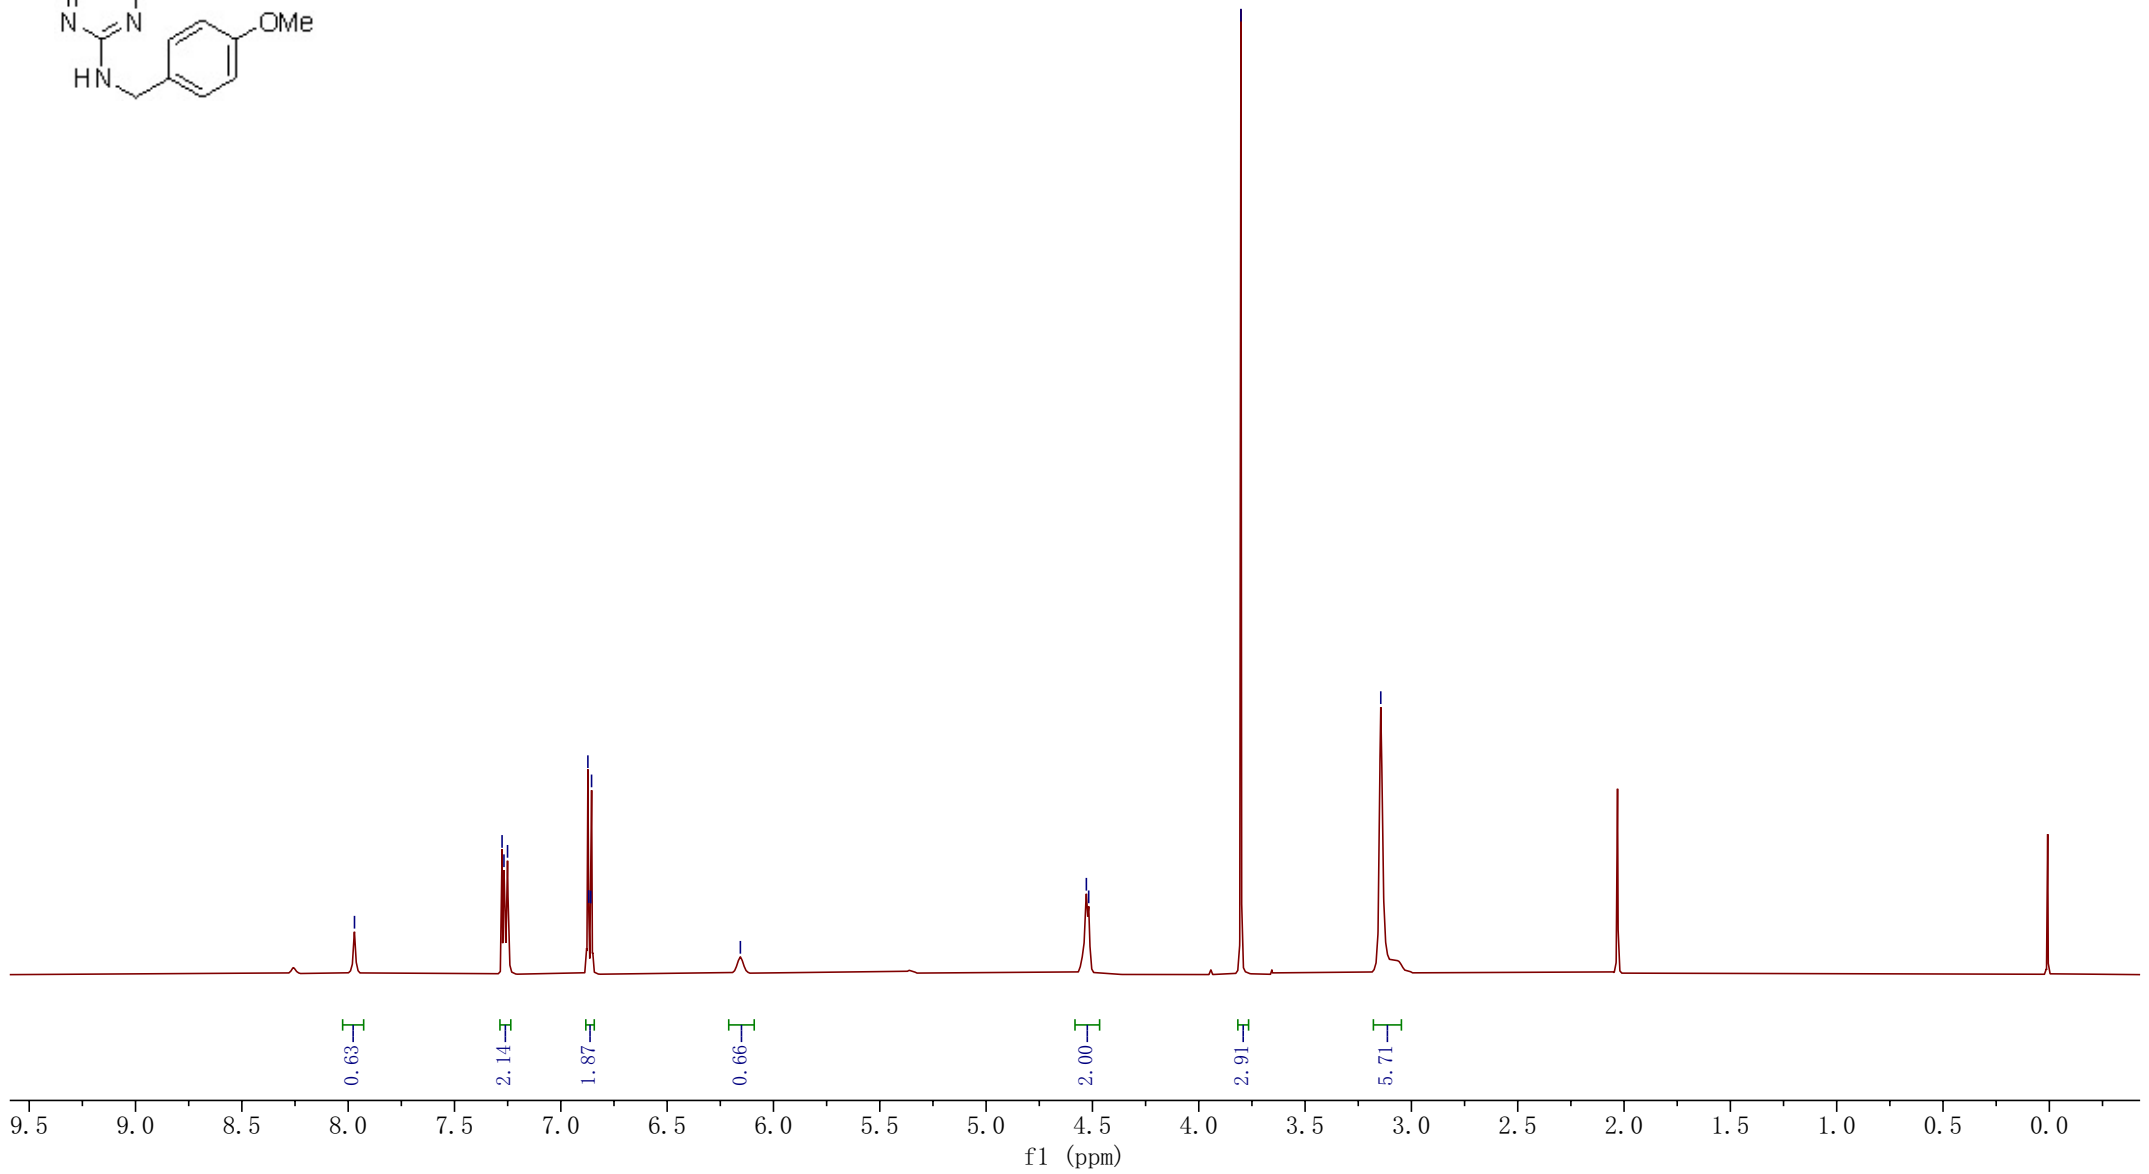

190121  
xzp181122 CDC13 0121

164.9731  
164.6387  
164.5214

158.8117

131.0012  
128.8916

113.9046

55.2396

43.9918

36.1969  
36.0150

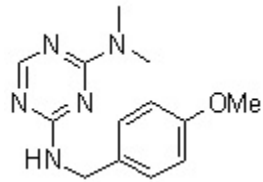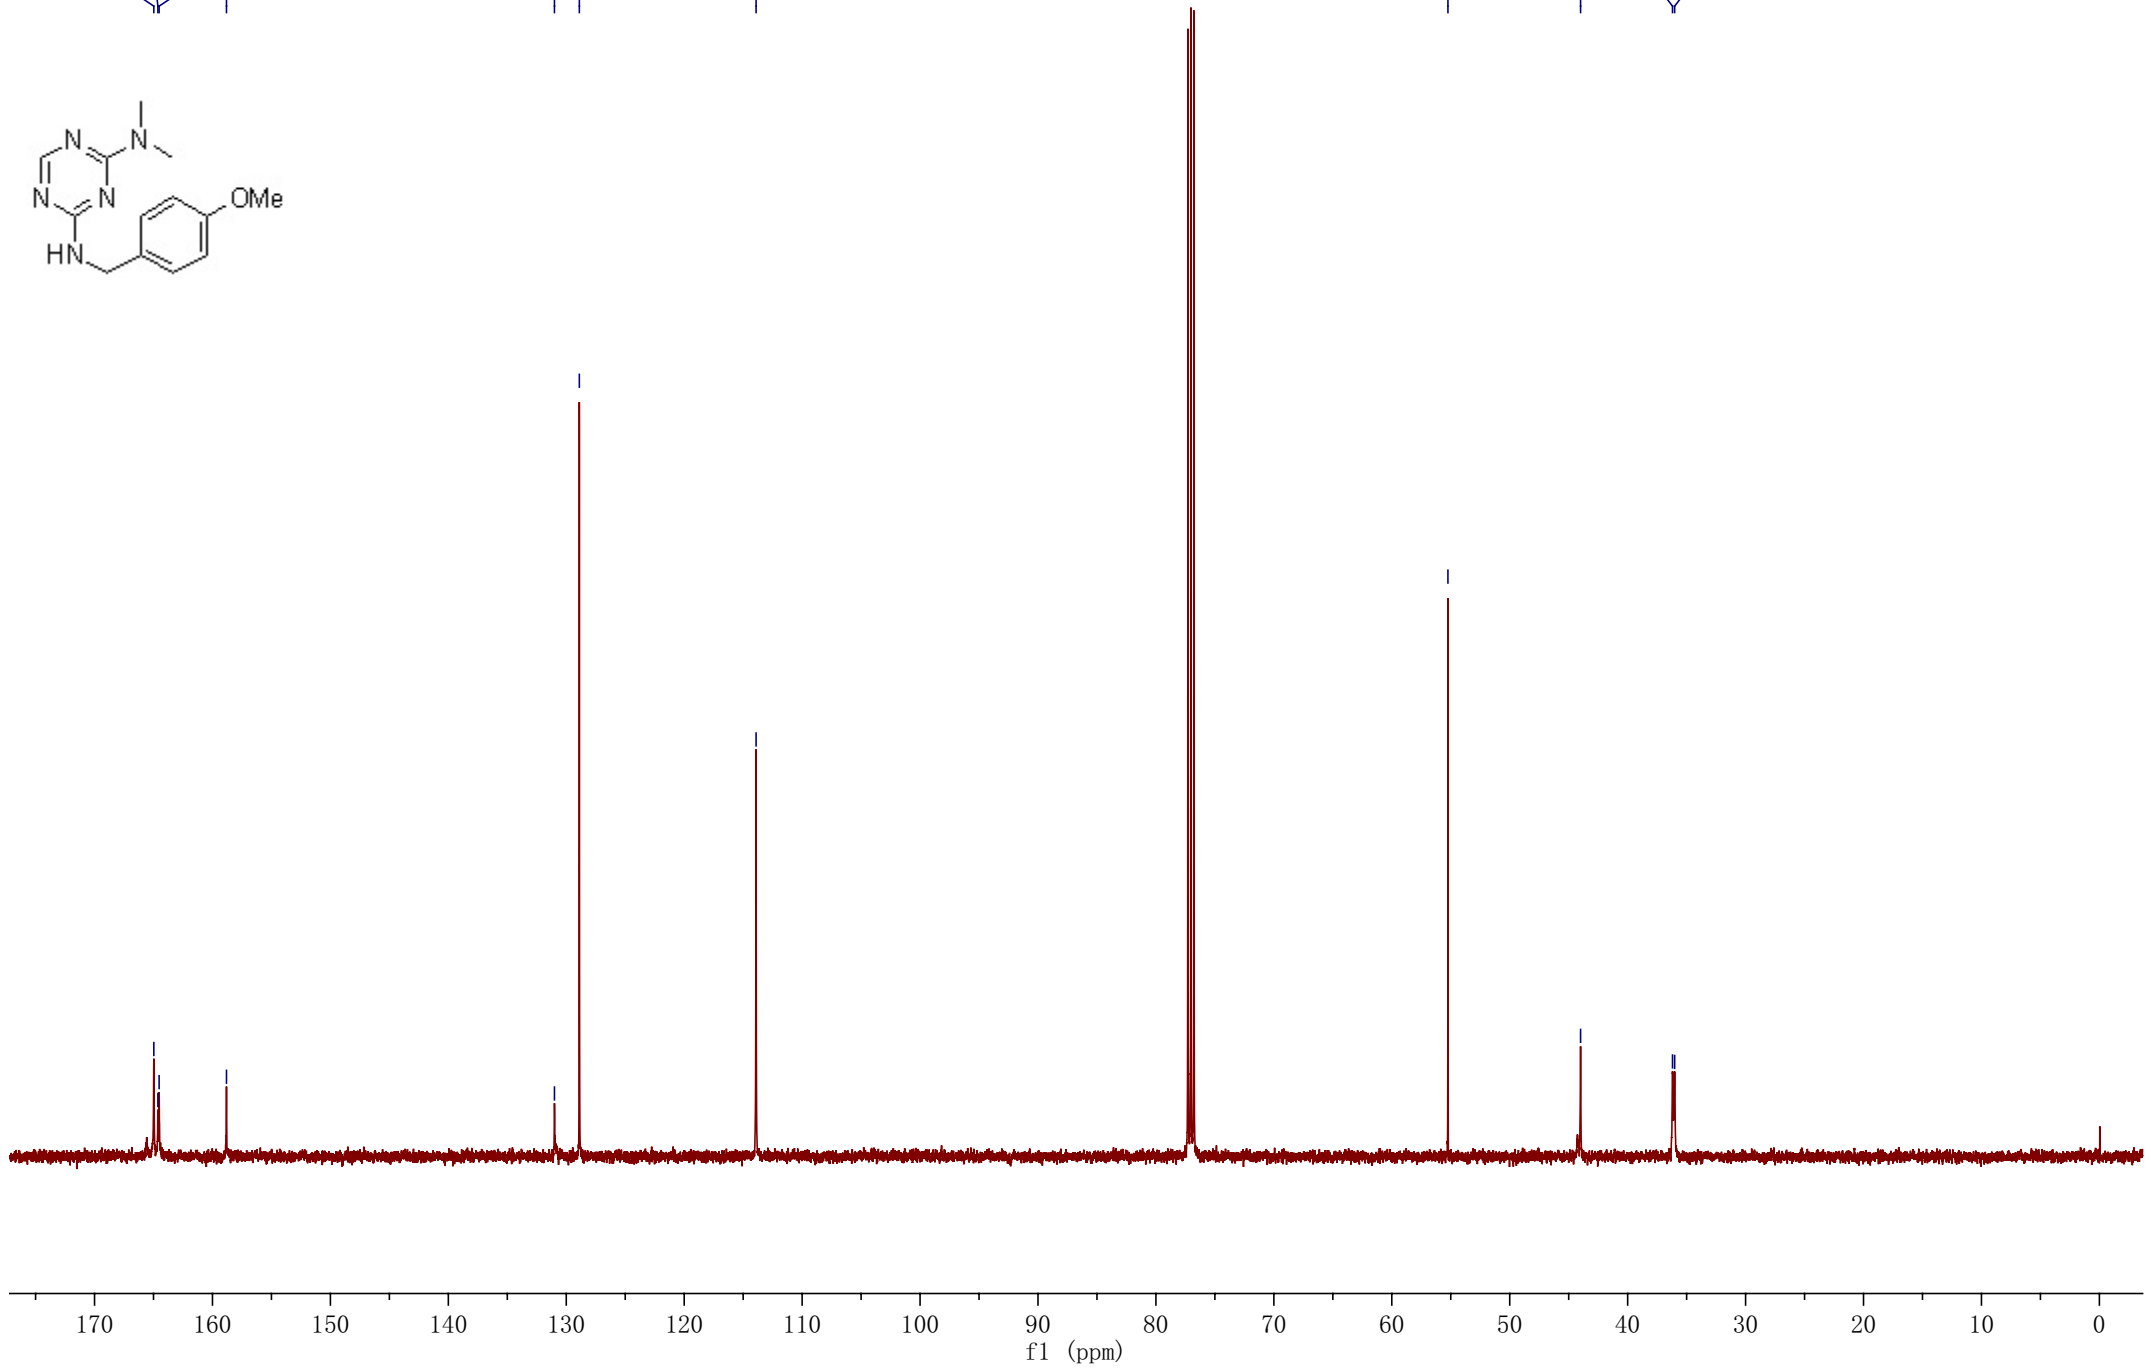

190107  
xzp181122-160

8.6882  
7.9860  
CDC13

7.3000  
7.2956  
7.2873  
7.2827  
7.2679  
7.2508

6.3676

4.5623  
4.5513

3.1433  
3.0902

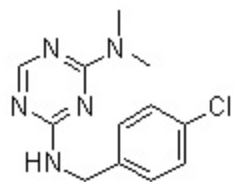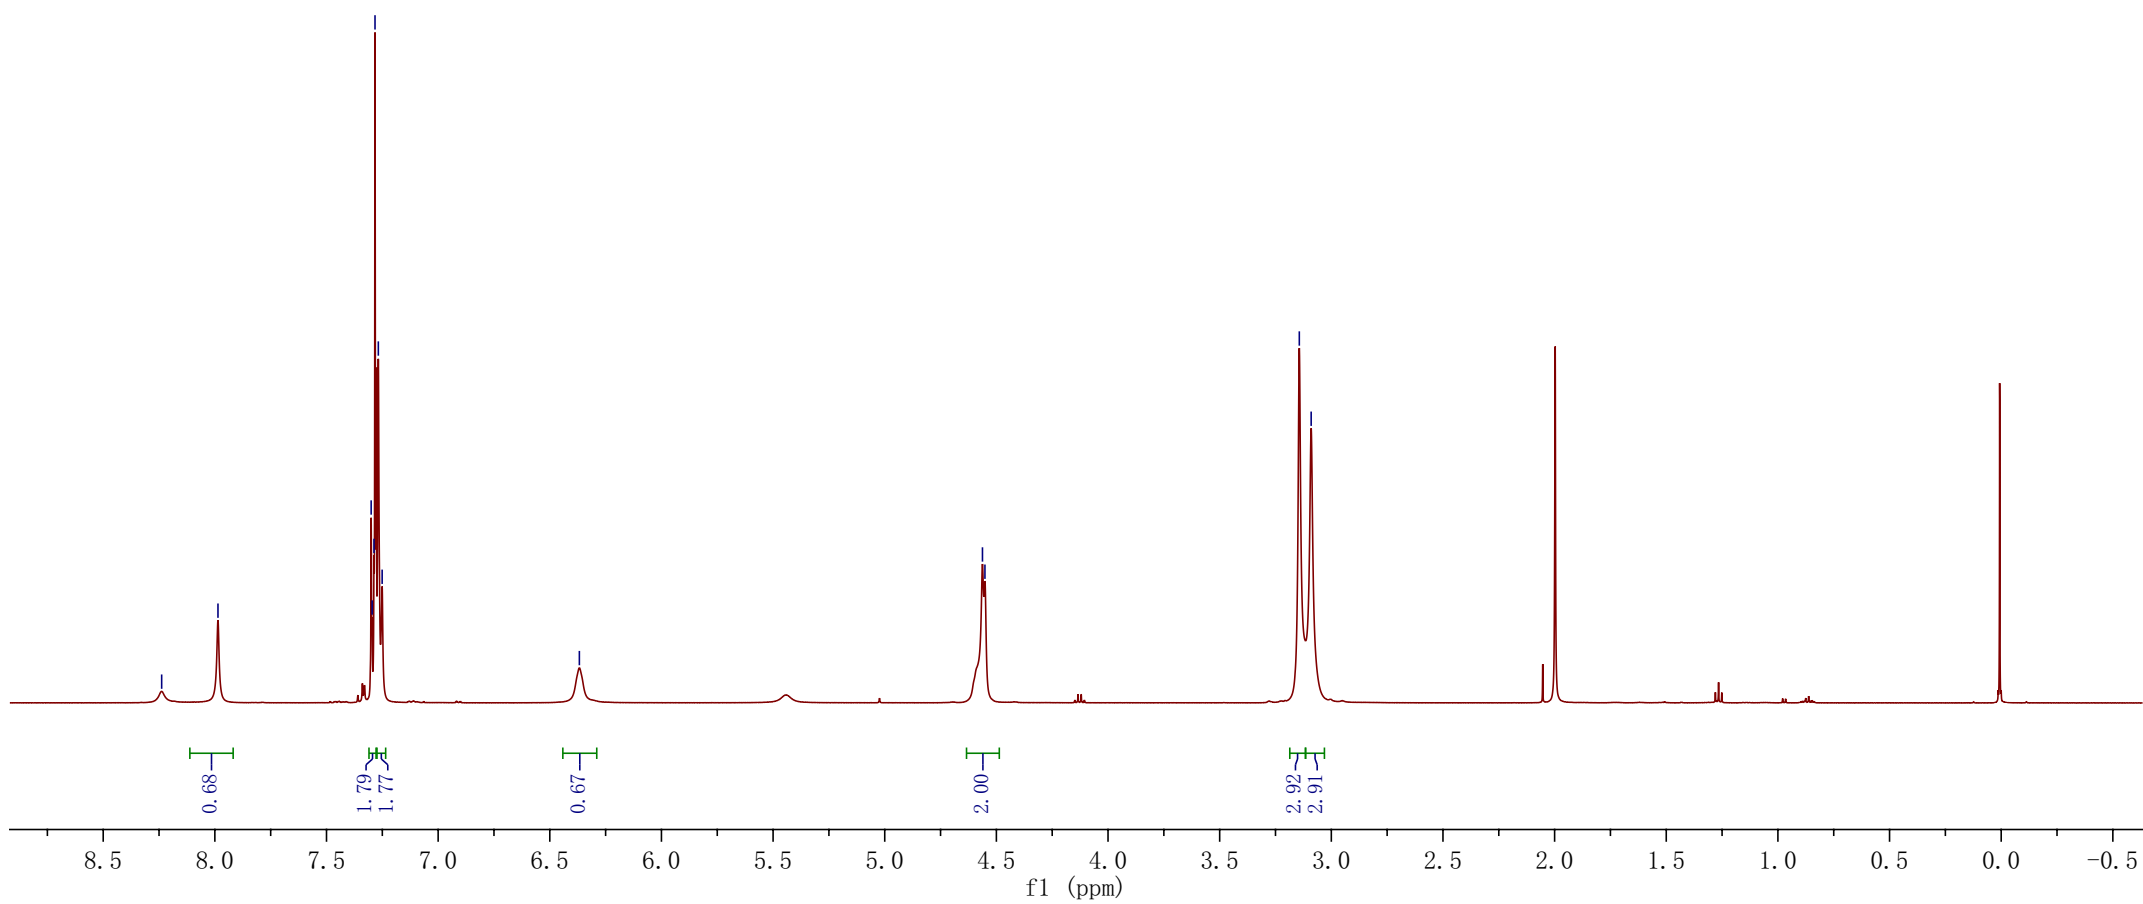



190115  
xzp181122-160 0115

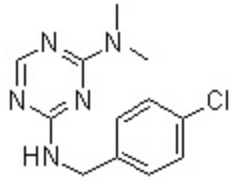

165.0035  
164.9993  
164.9613

137.5666

132.9045

128.8221  
128.6279

43.8687

36.2670  
36.0488

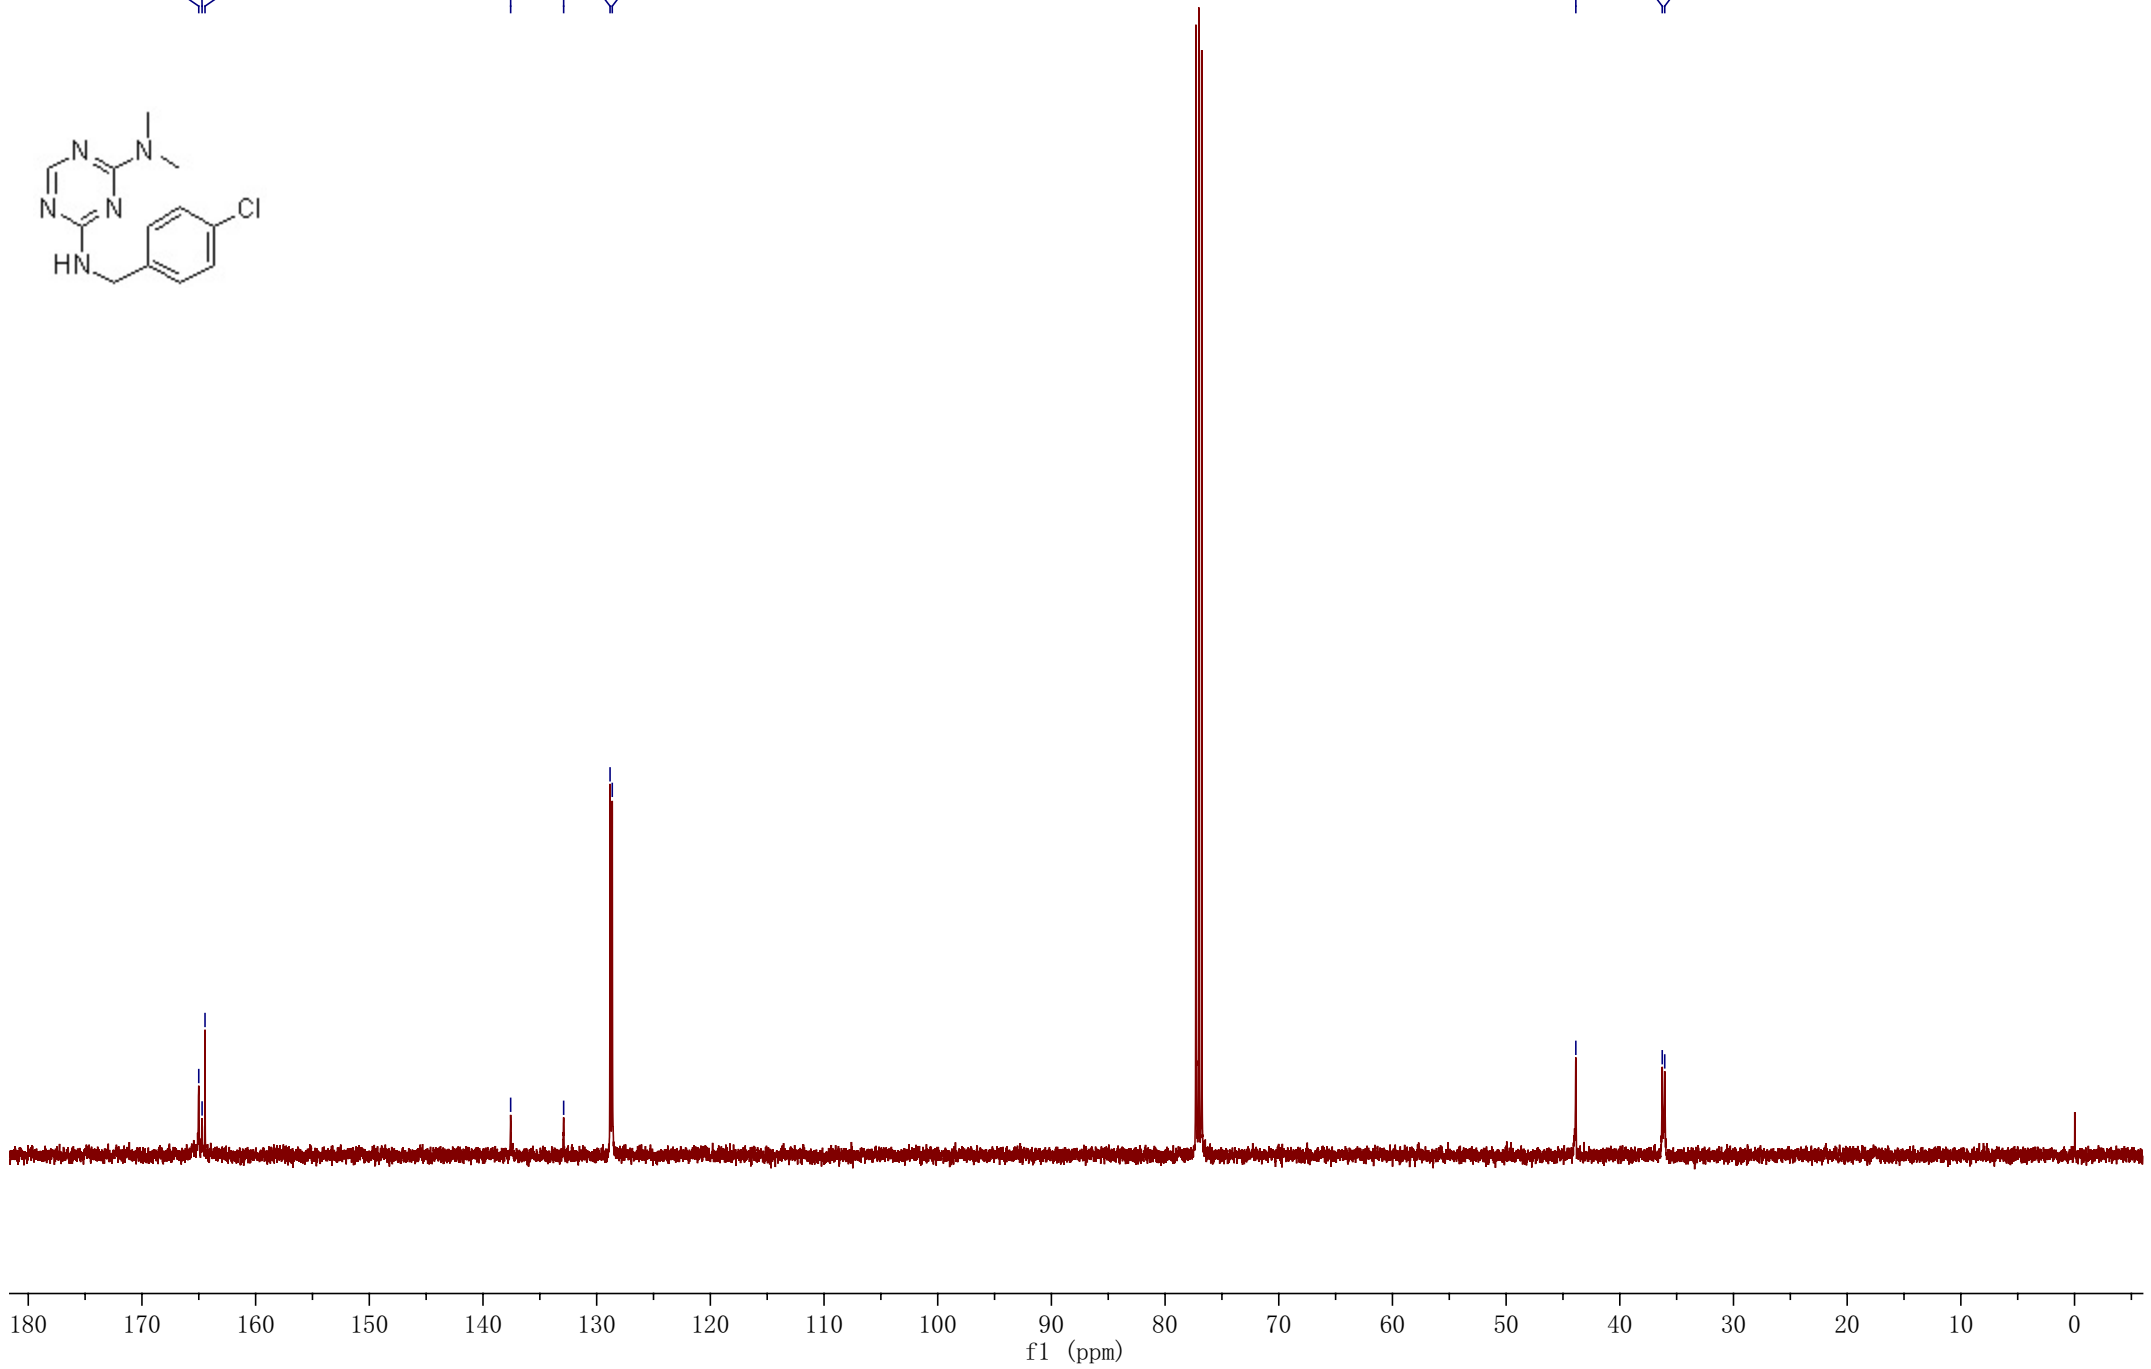

190107  
xzp181130-165

CDC  
7.8274  
7.3093  
7.2934  
7.2822  
7.2765  
7.2688  
7.2330  
7.0189  
7.0093  
7.0056  
7.0018  
6.9923  
6.9883  
6.9824  
6.5542

4.5568  
4.5461

3.1422  
3.1077

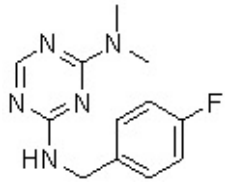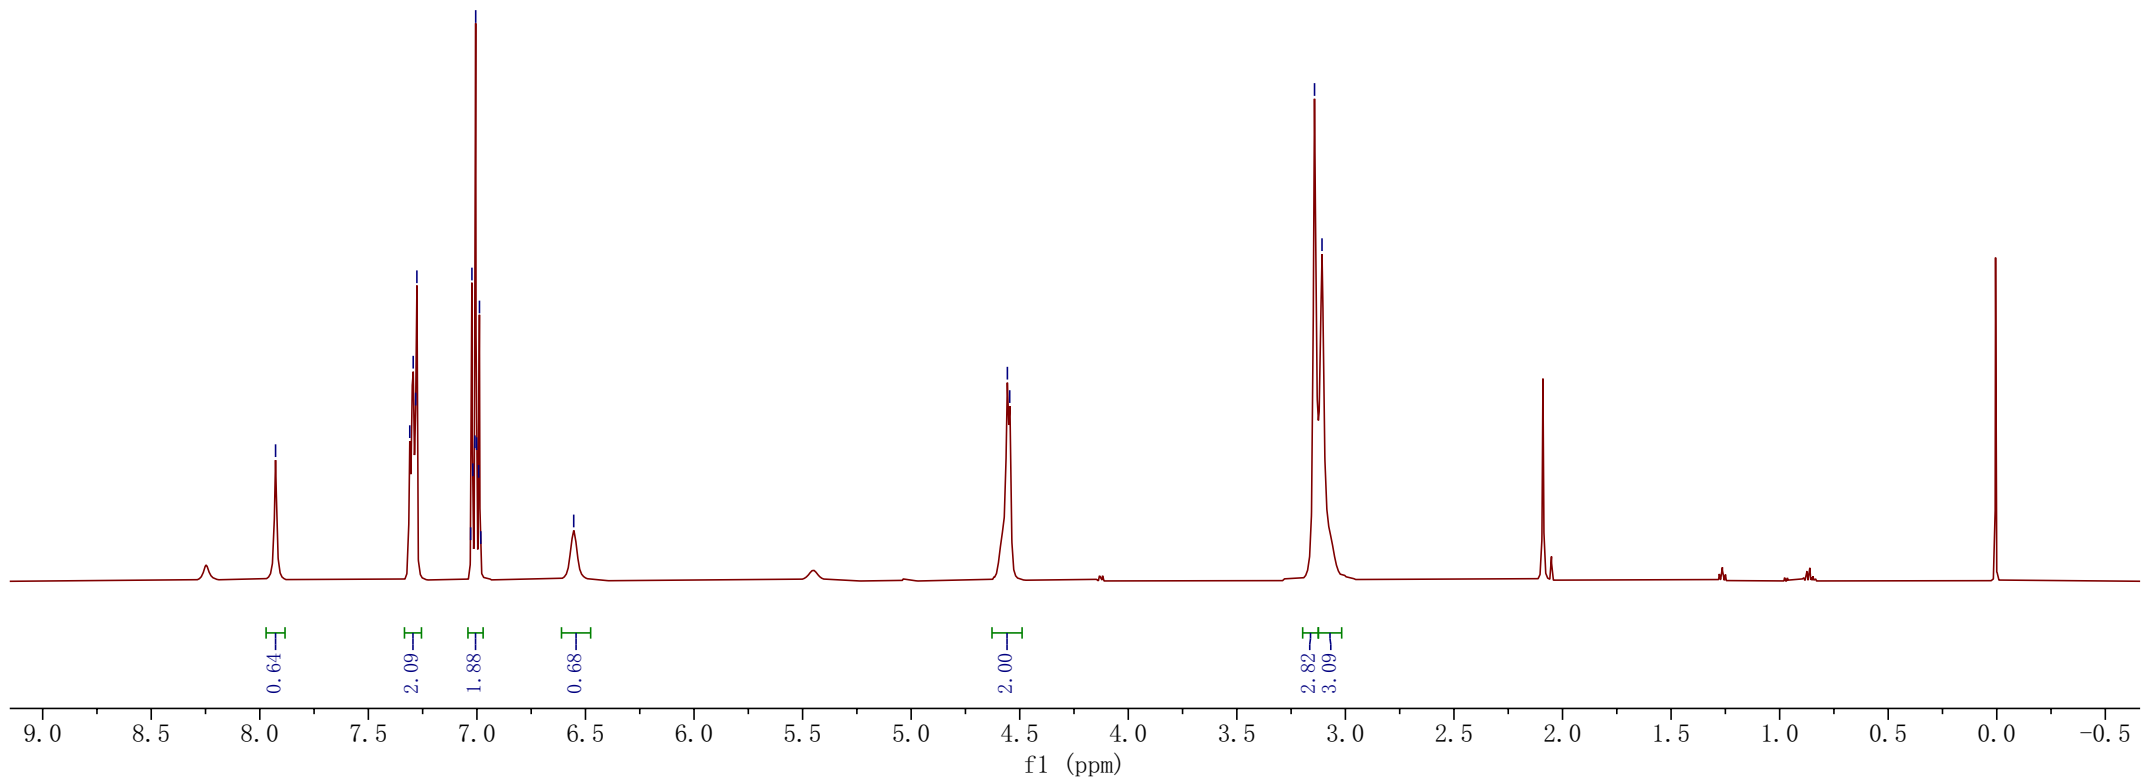

190115  
xzp181130-16

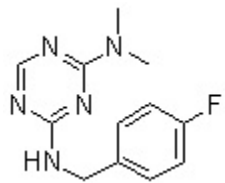

164.9870  
164.6785  
164.6656  
162.3877  
161.0411

134.7635  
129.1992  
129.1368  
115.4143  
115.2446

43.8435  
36.2355  
36.0105

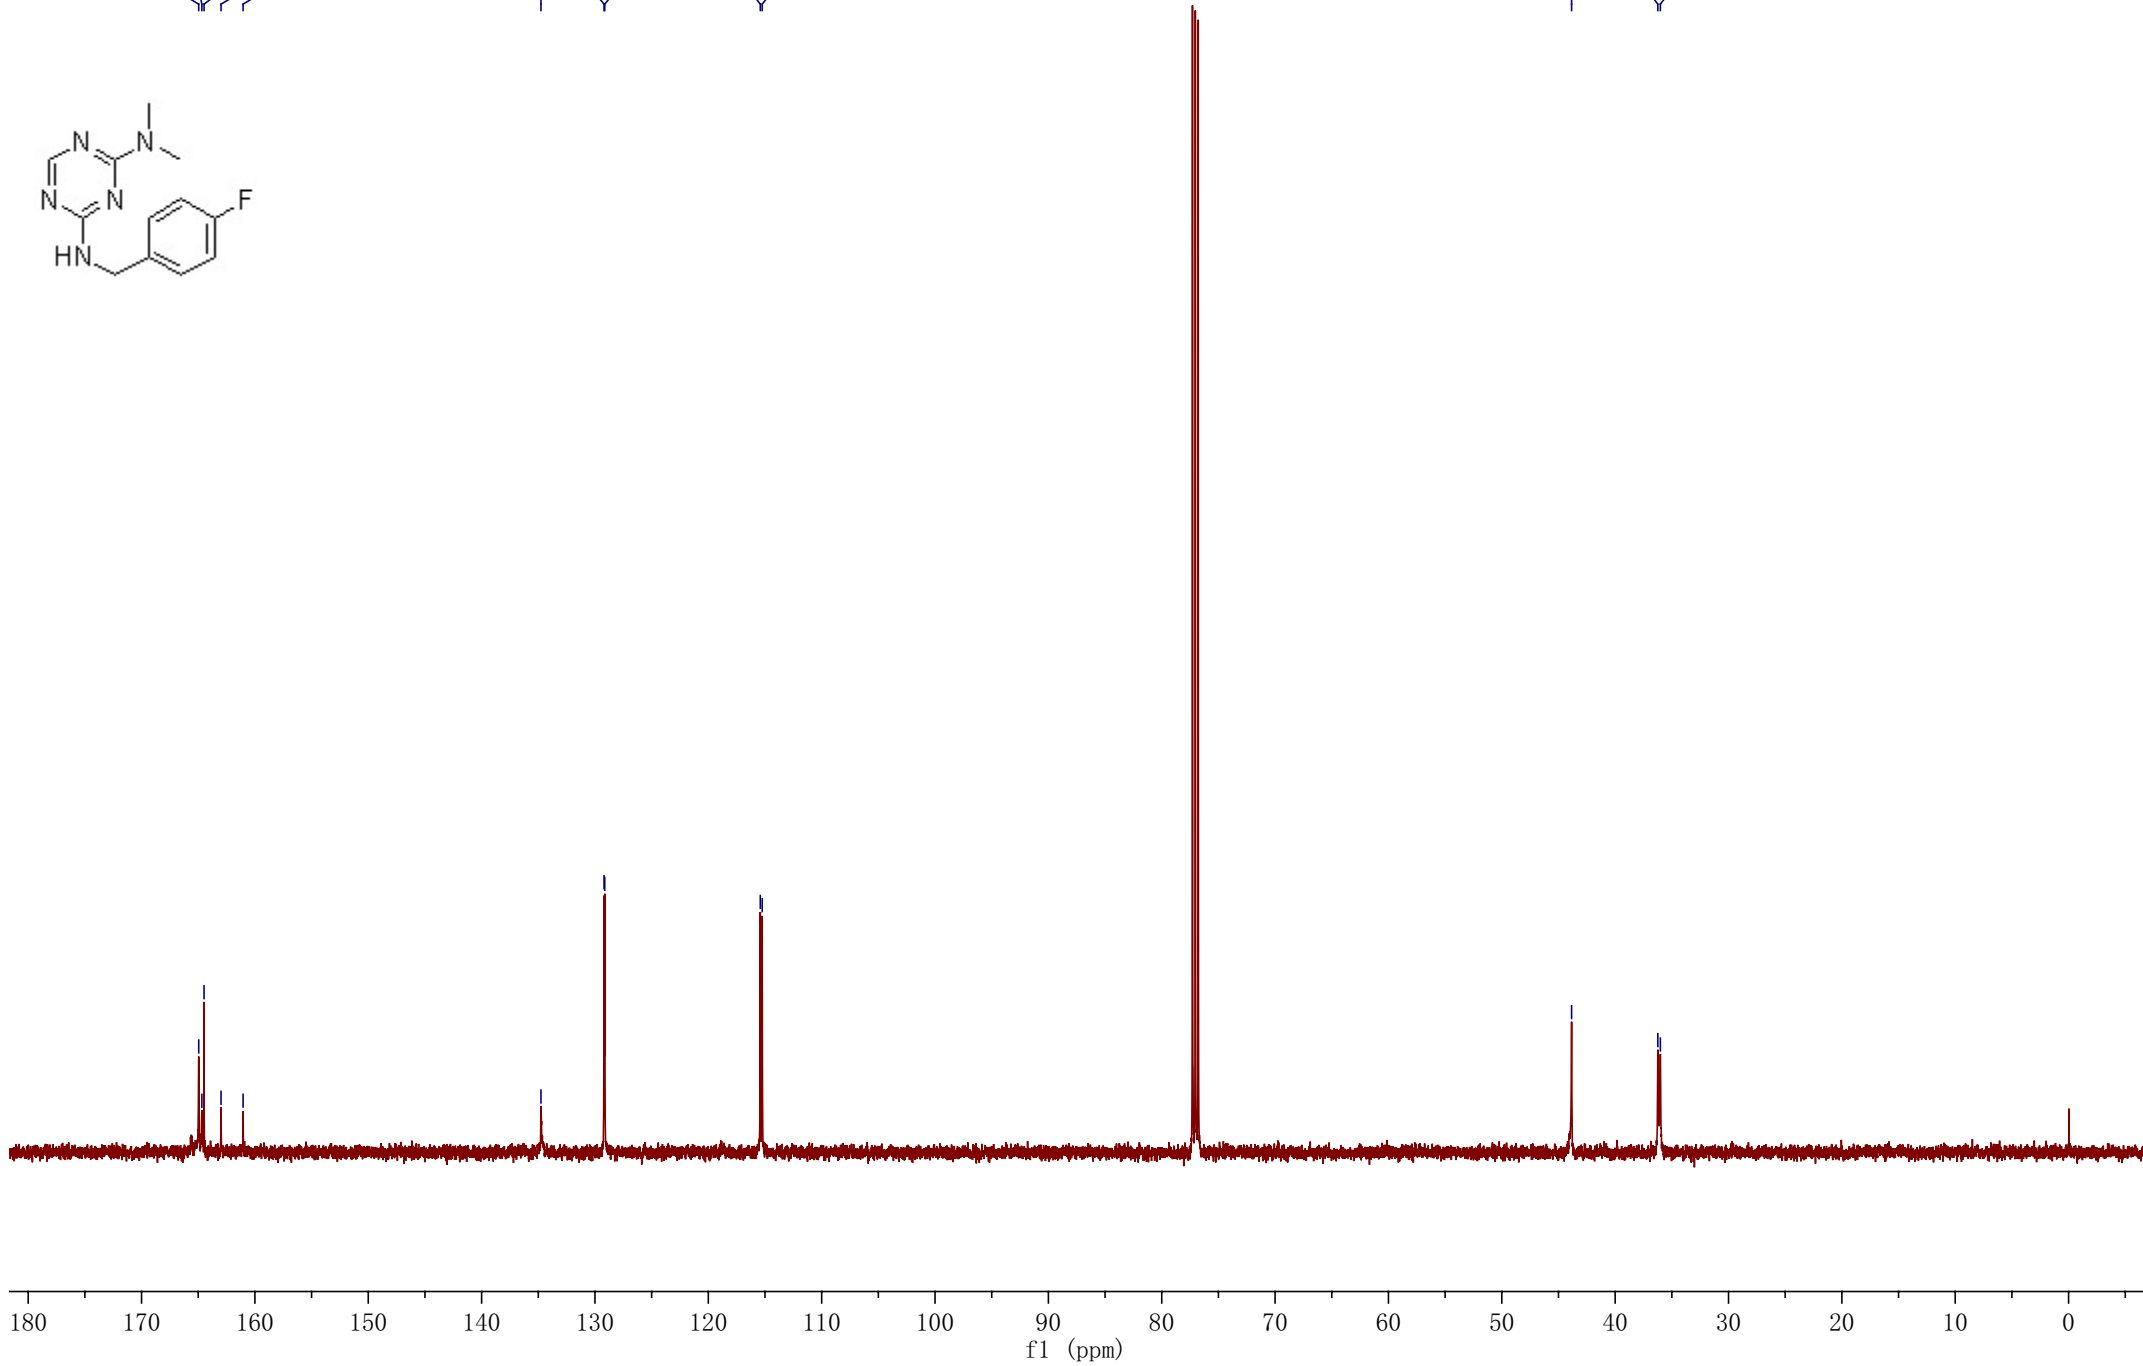

190423

xzpl90321-15

8.3885  
7.4233  
7.6100  
7.5289  
7.5136  
7.4514  
7.4361  
7.4207

6.6296

4.6401

3.1379  
3.0778

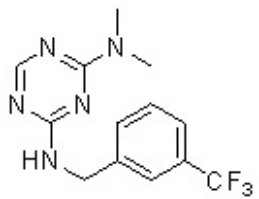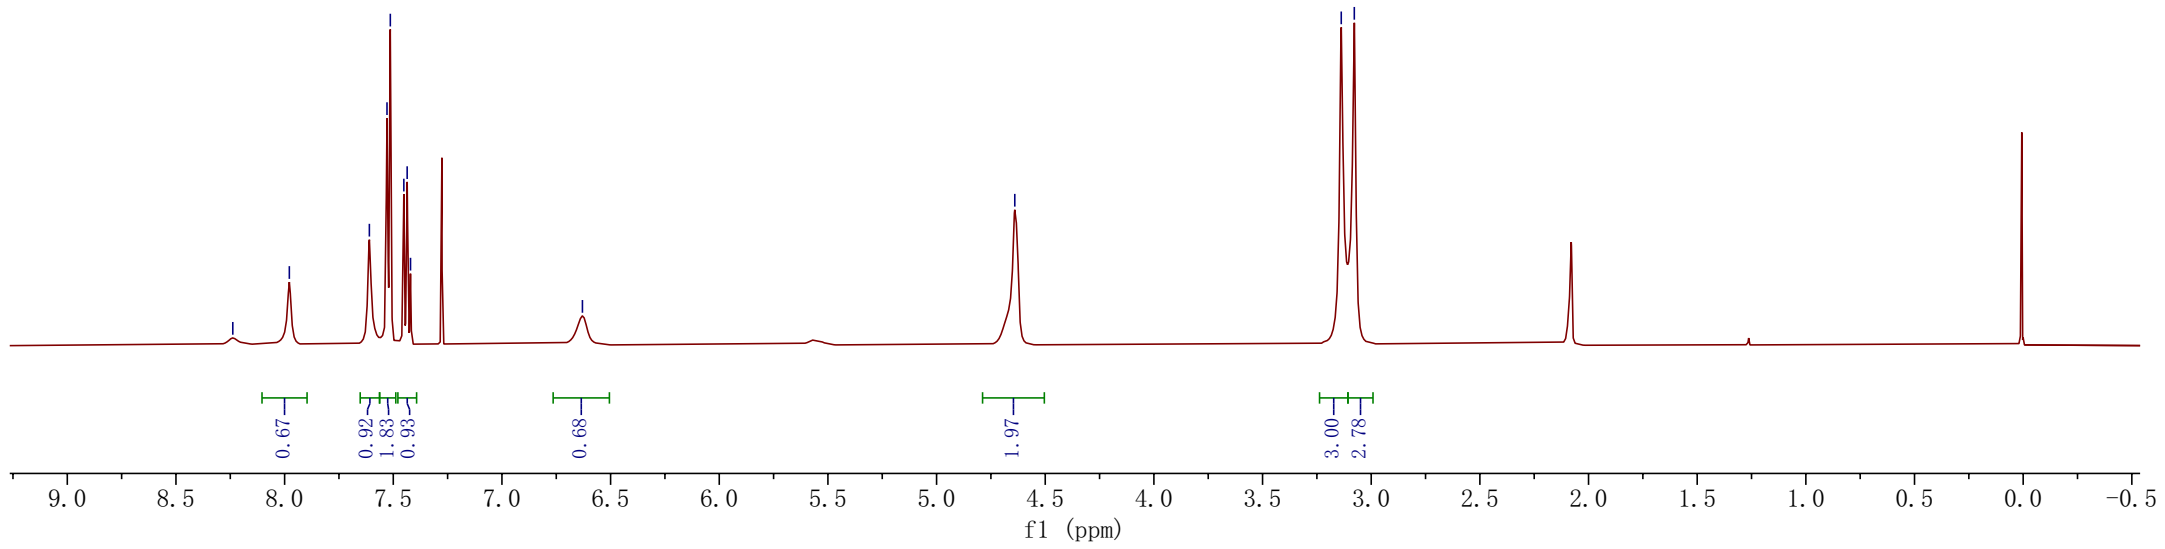

190522  
xzp19043

CDC13

140.891

130.7959  
129.0075  
125.1882  
124.4307  
124.0760  
123.0239

44.2572

36.2797  
36.0233

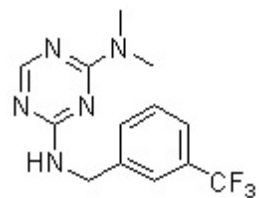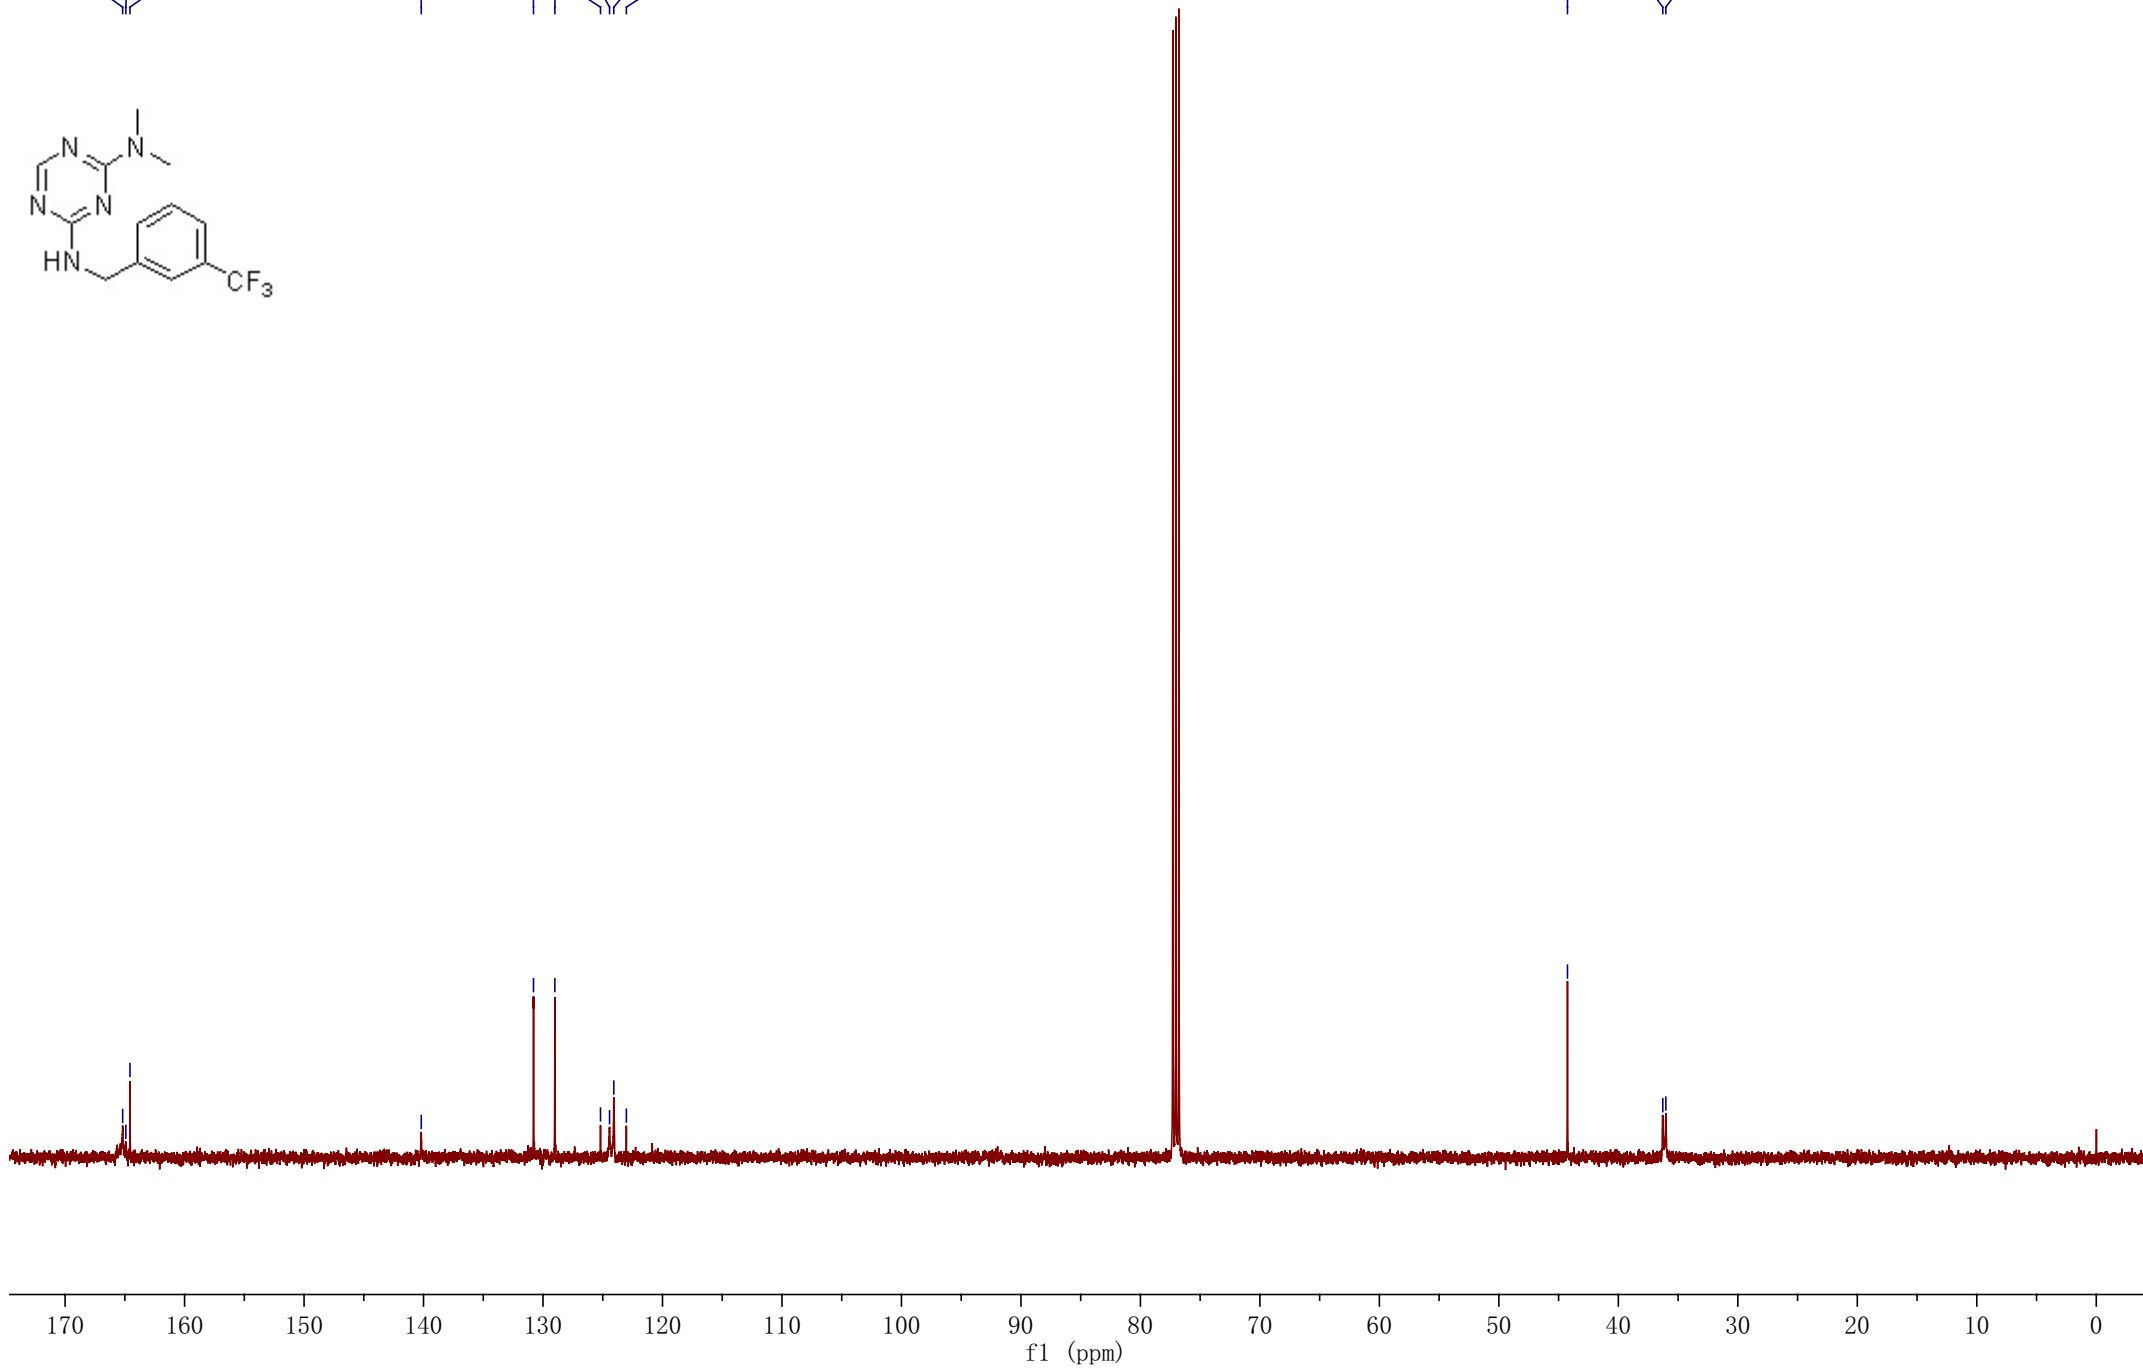

190102  
xzp181101-139 CDC13 0108

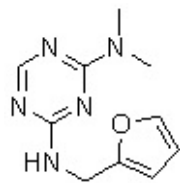

7.0961

7.4779  
7.3558

6.5254  
6.3237  
6.3198  
6.3176  
6.3139  
6.2408  
6.2349

4.5928  
4.5829

3.1533

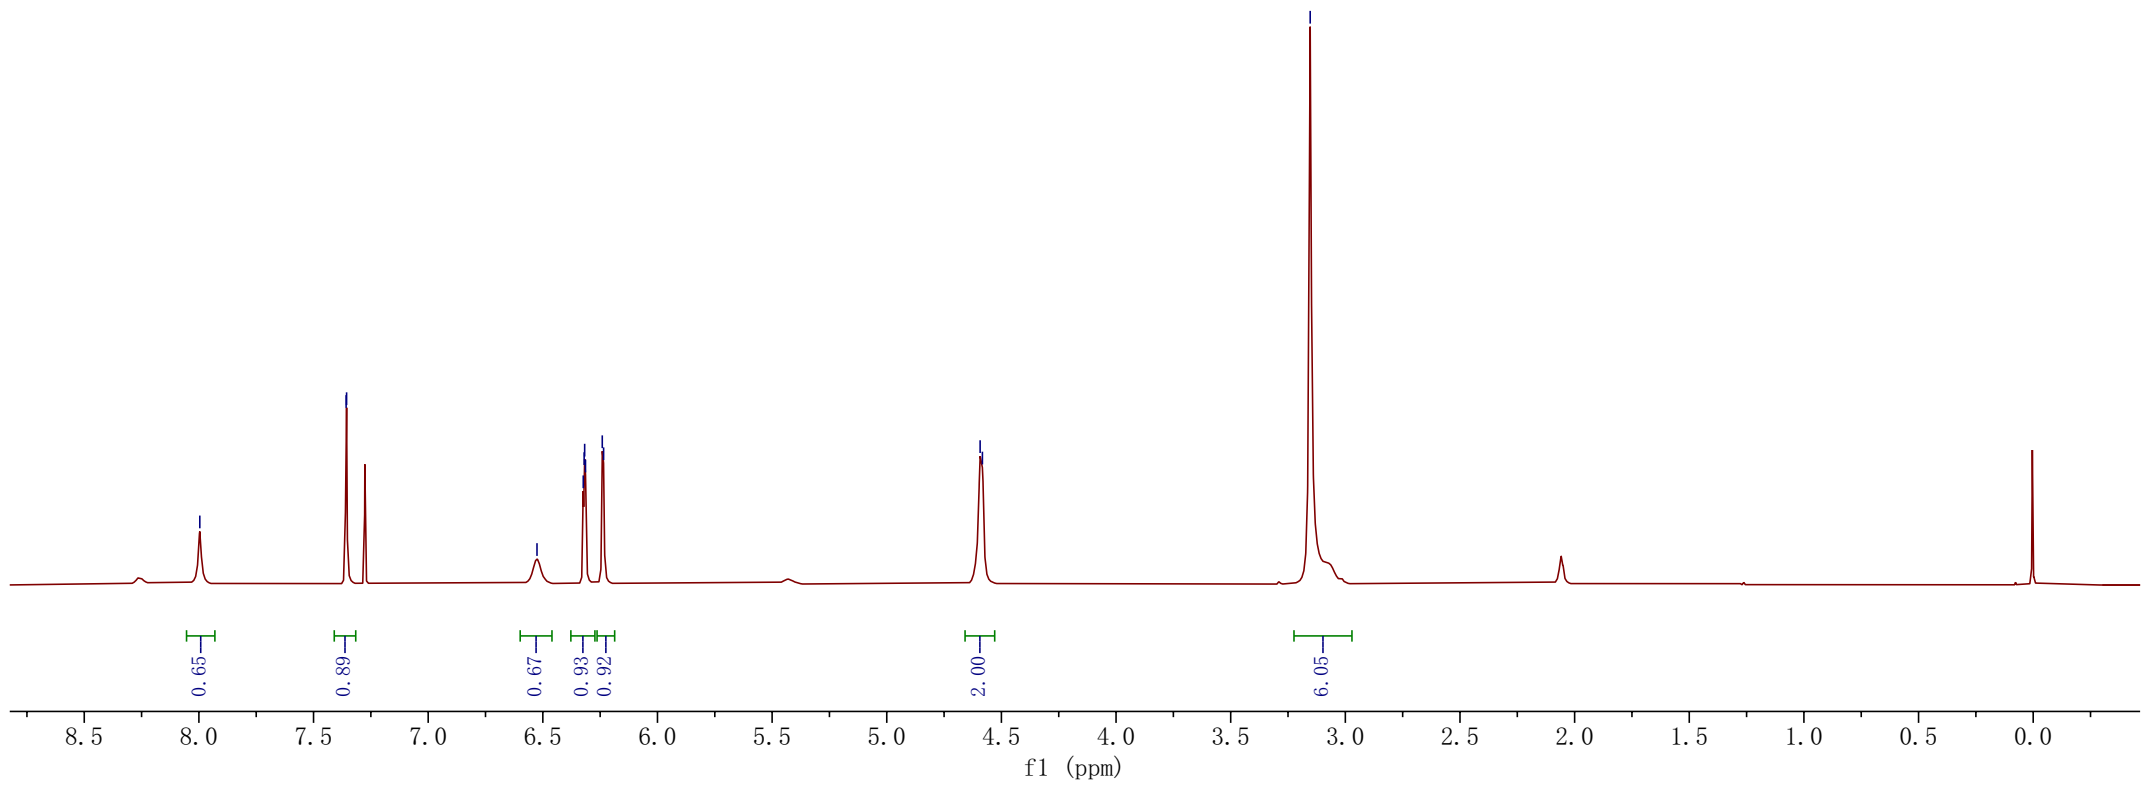

190115

xzpl81101-139

165.5181  
165.0907  
164.8893

152.0572

142.0122

110.3280

107.0488

37.5845  
36.2301  
36.0238

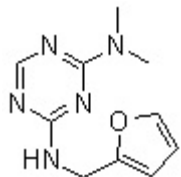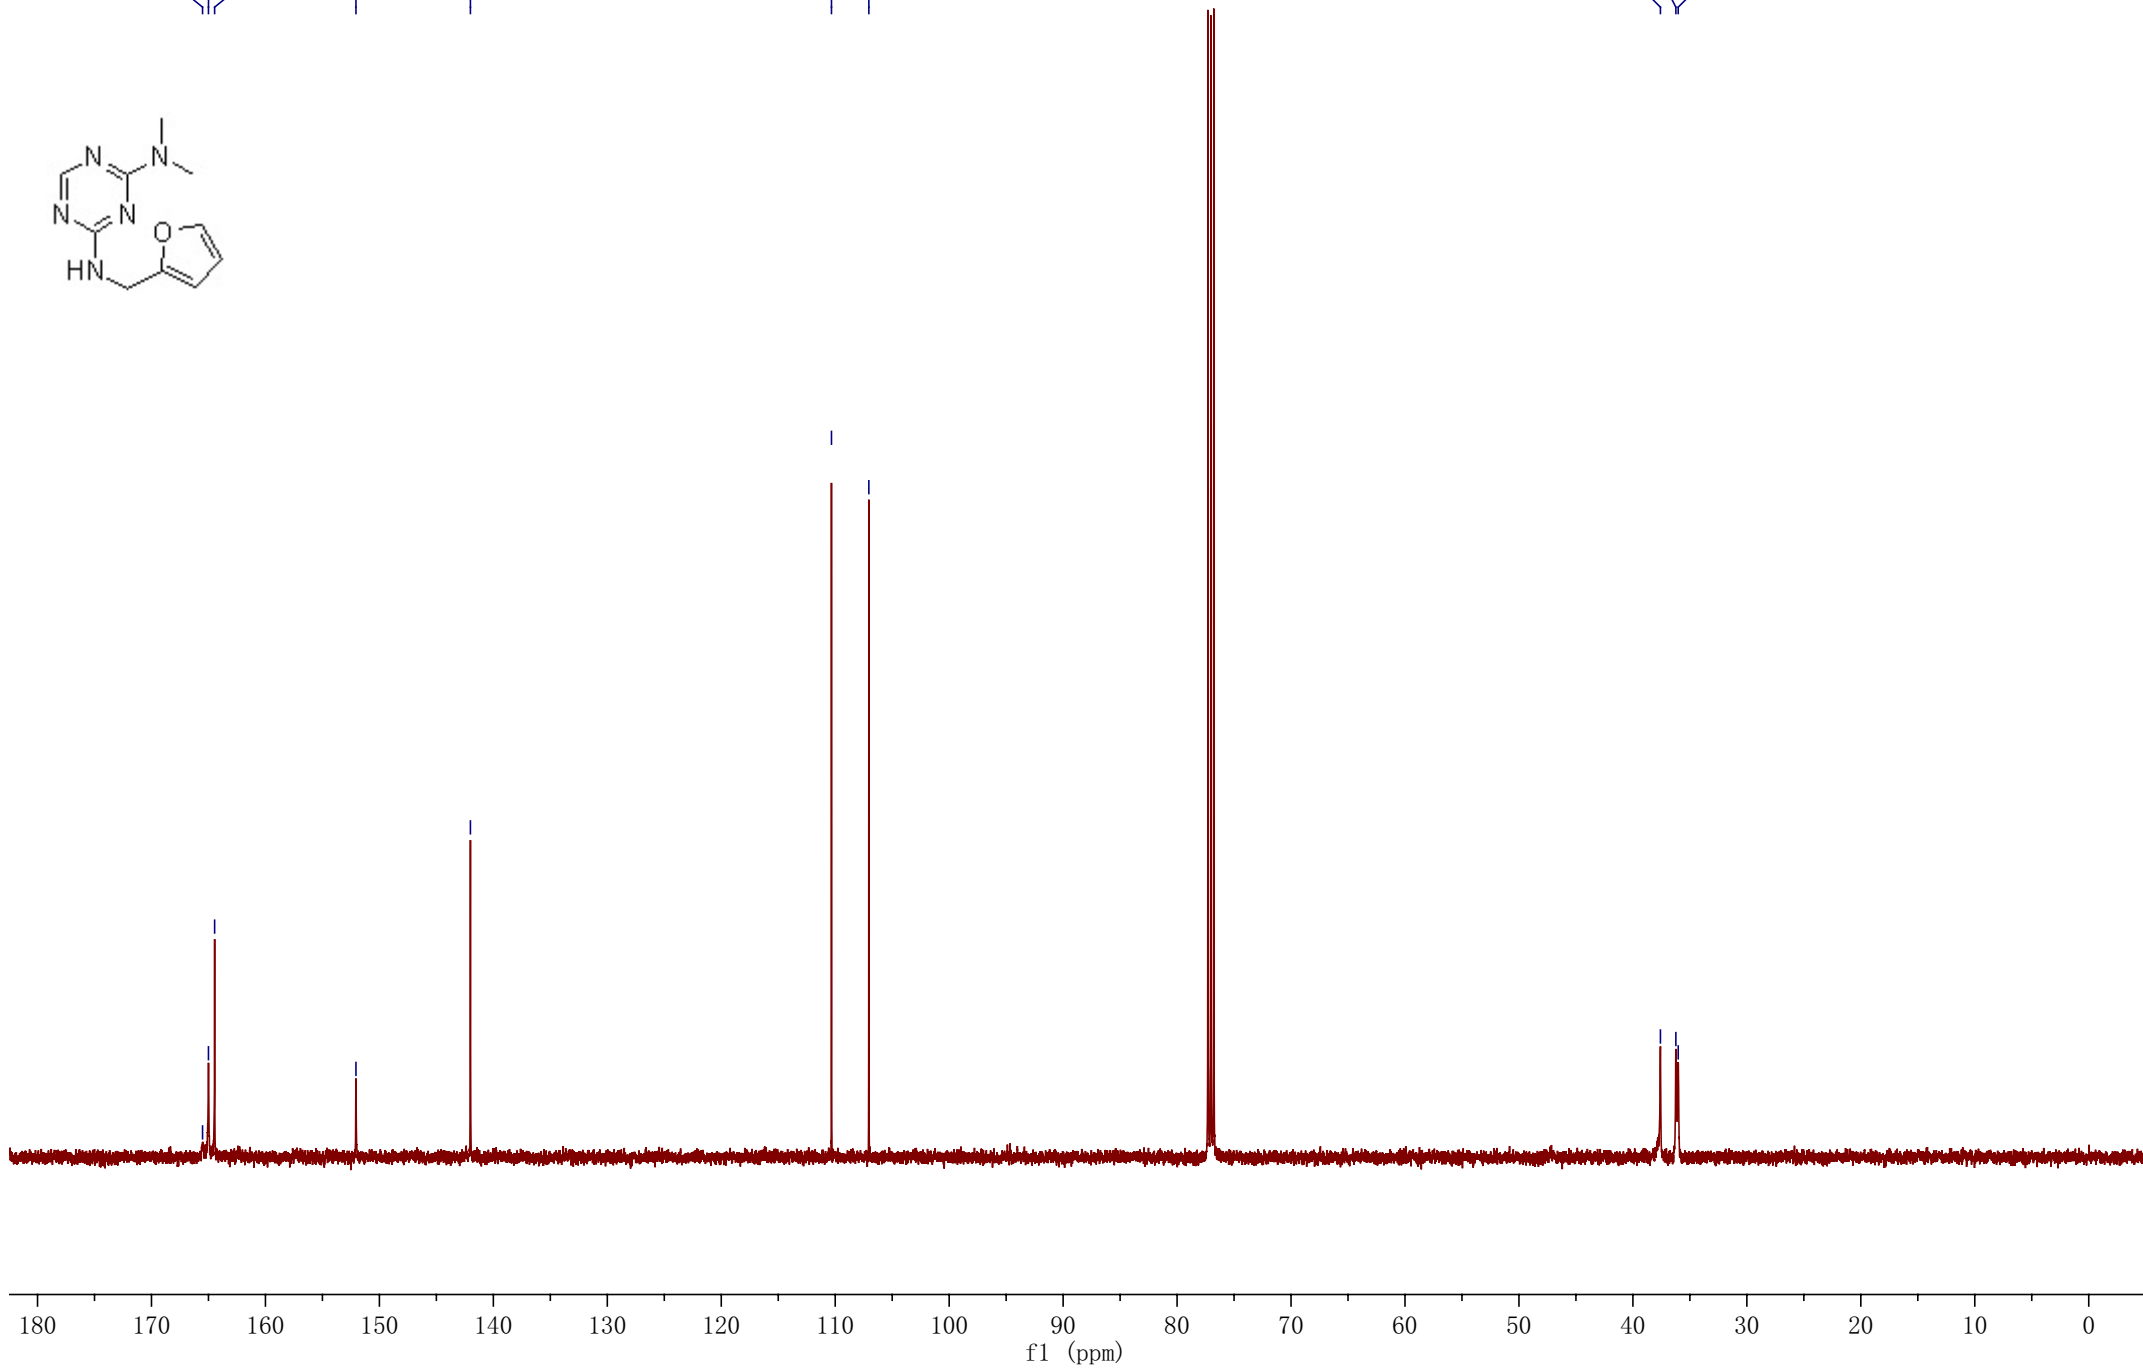

190102  
xzp181106-142

7.8425  
7.7330  
7.7107  
7.2028  
7.1905  
7.1910  
6.9991  
6.9942  
6.9924  
6.9560  
6.9491  
6.9459  
6.9389  
6.6549

4.7563  
4.7454

3.1641  
3.0692

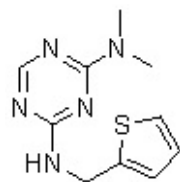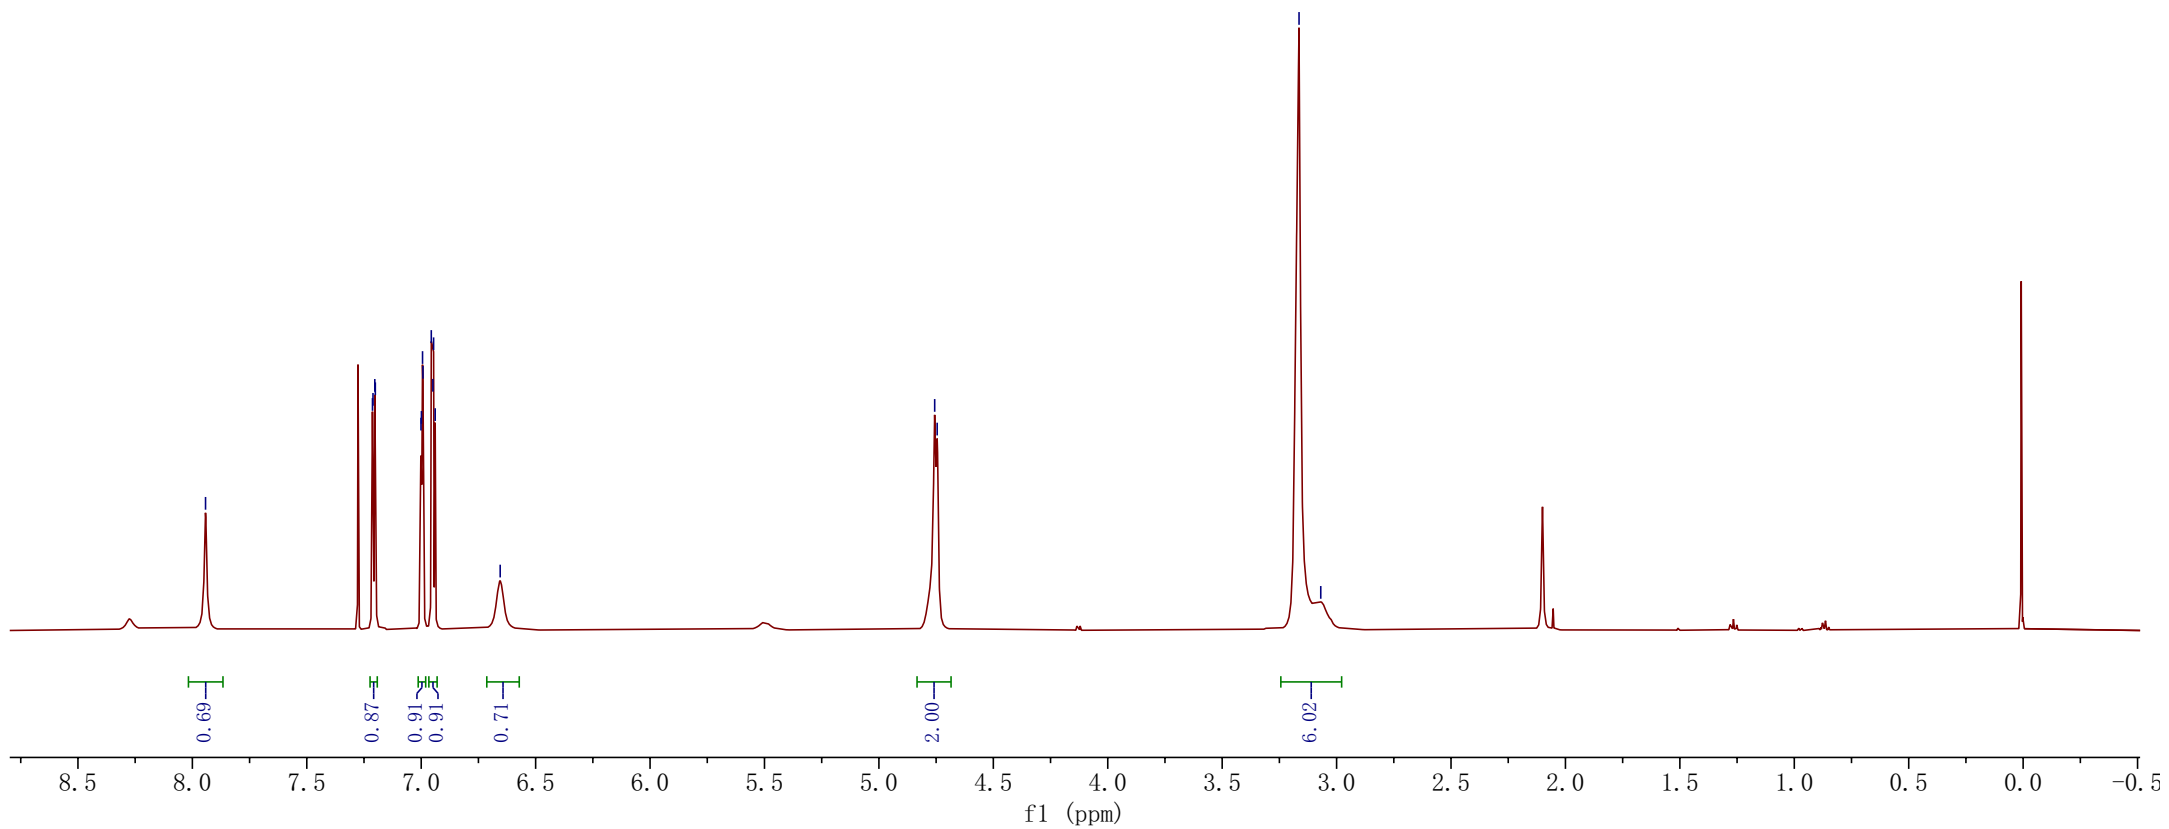



190121  
xzp1811

CDC13 0121

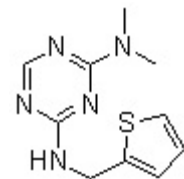

165.8449  
164.8894  
164.4362

141.8238

126.6701  
125.6403  
124.9430

39.3729  
36.2755  
36.1340

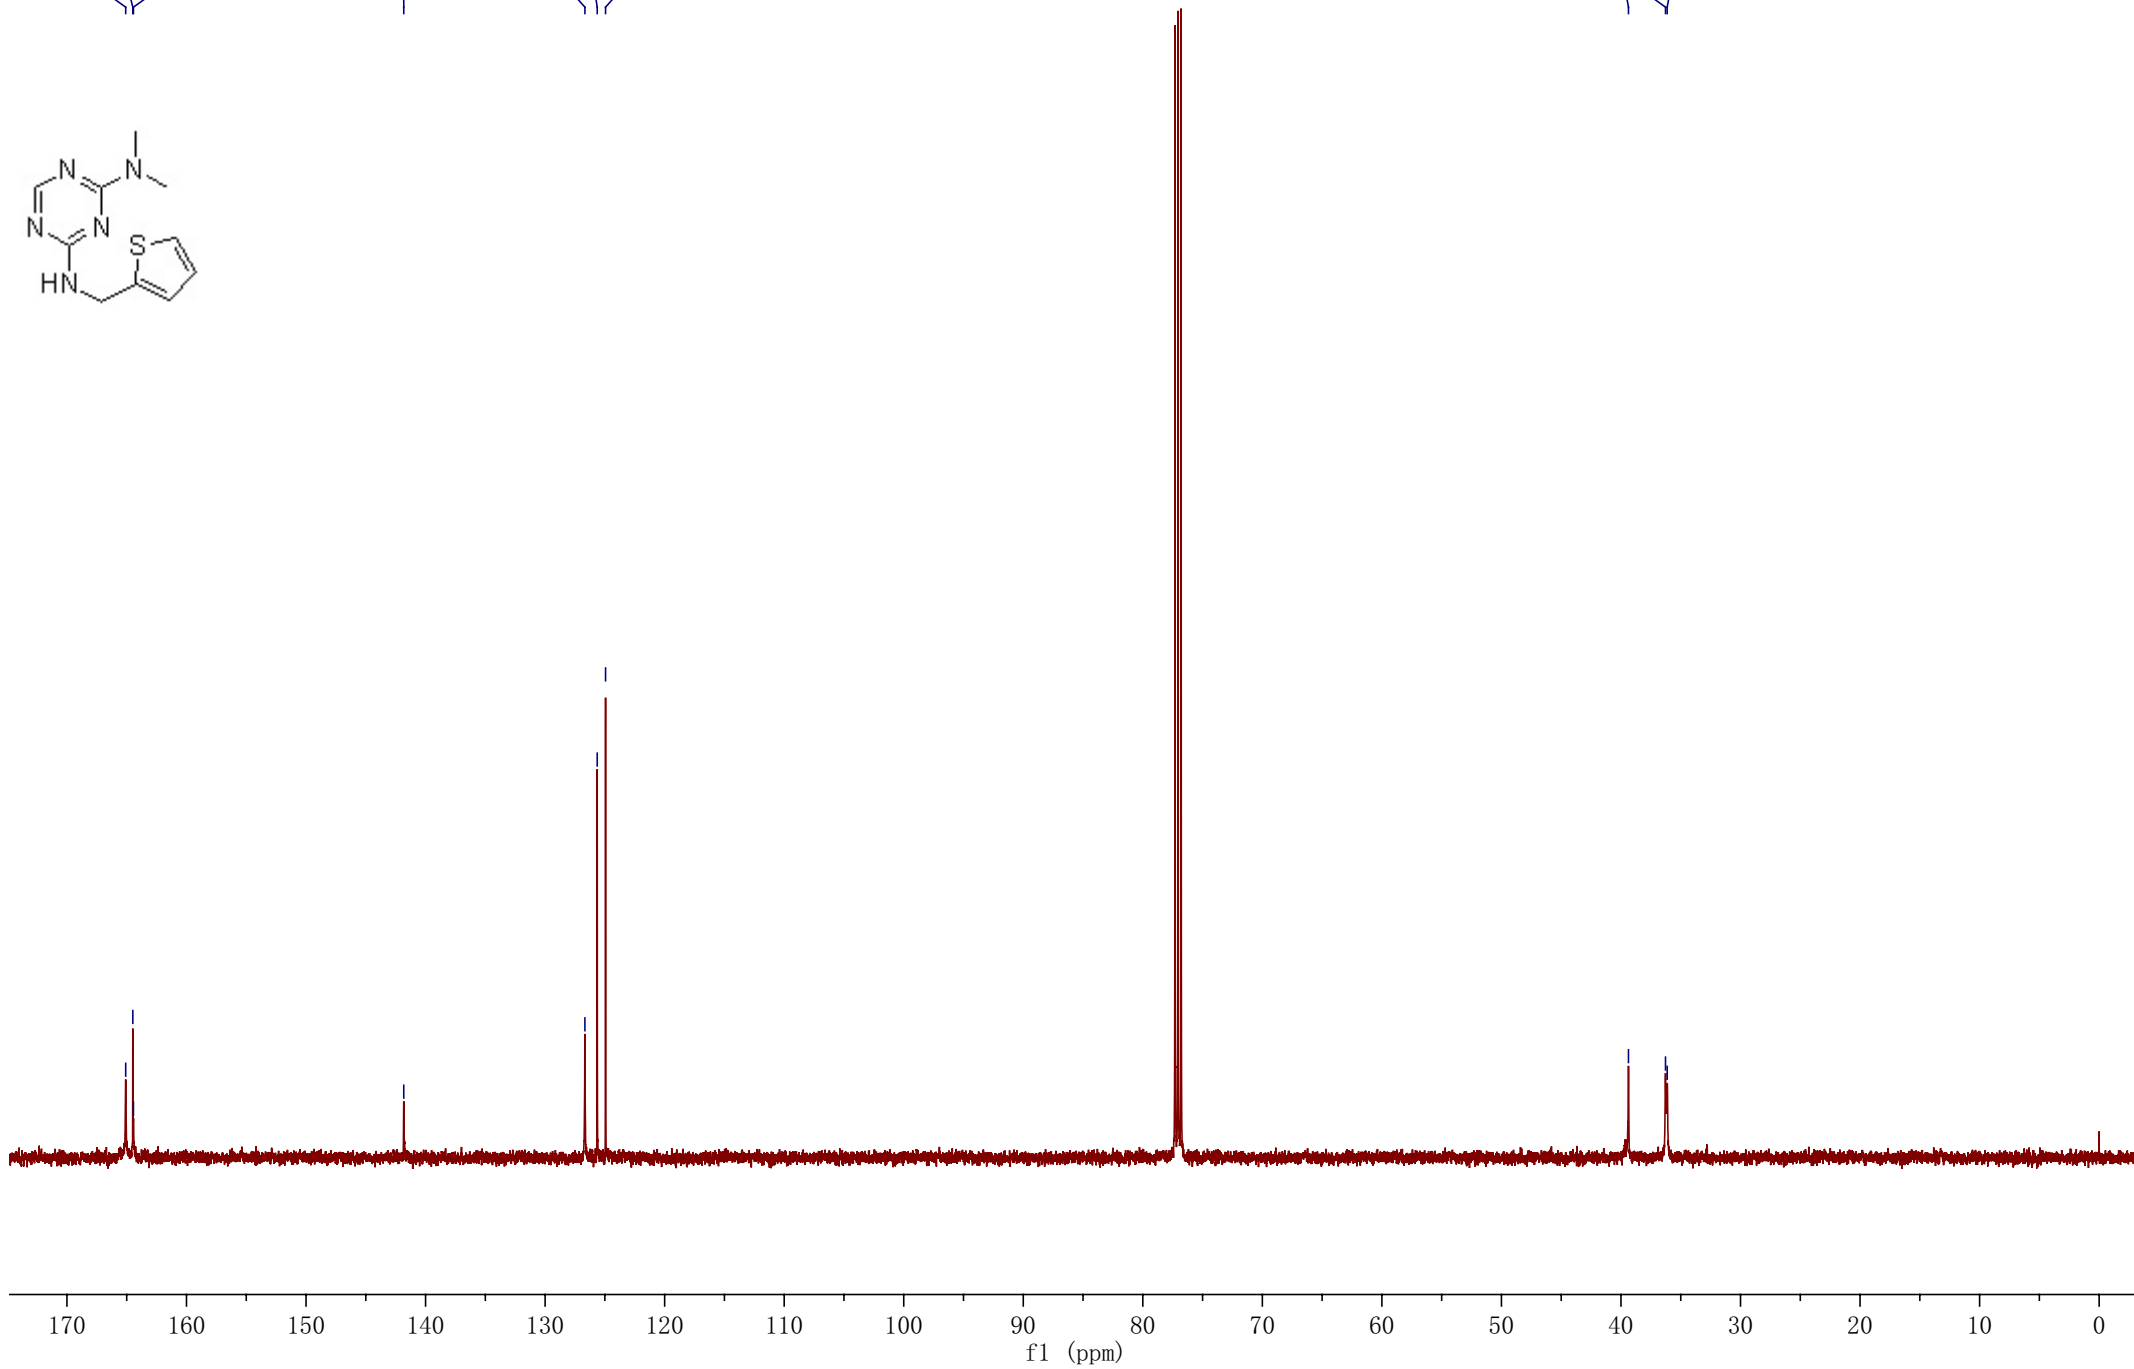

191031

xzpz191025-103

8.3984  
8.5076  
8.6951  
8.8381  
8.8956

1033  
7.8819

7.6572  
7.6415

7.2479  
7.2383  
7.2324  
7.2228

6.7640

4.5900

3.1259  
3.0723

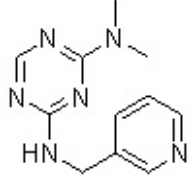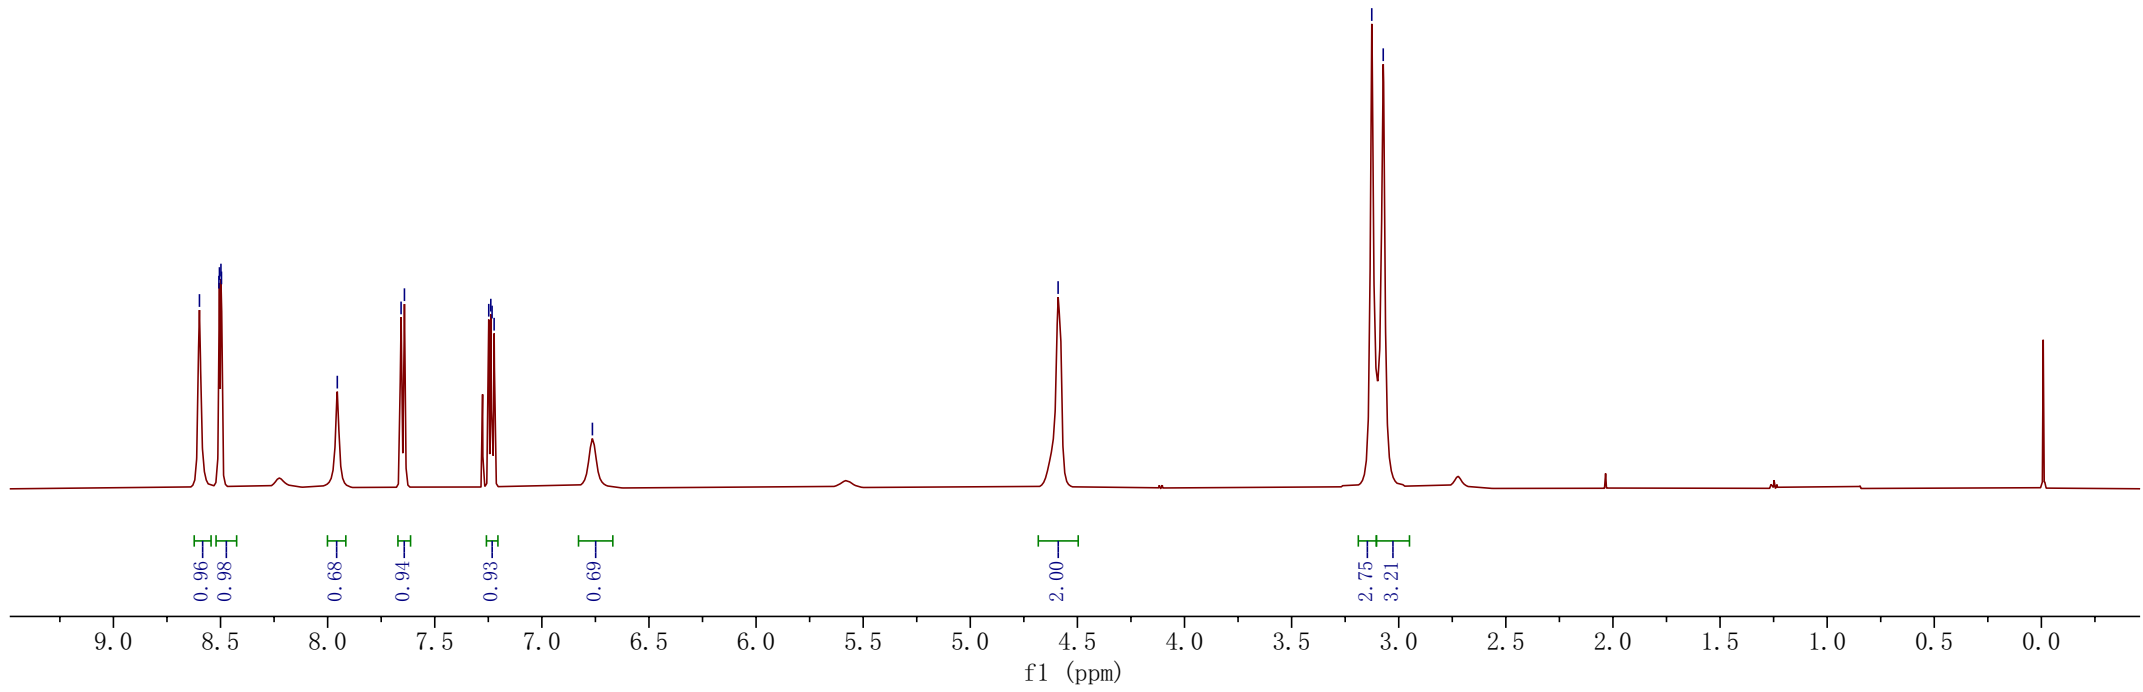

191105  
xzp191025-103-DC13 1105

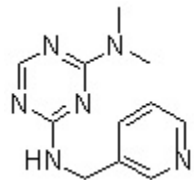

164.8855  
164.6822  
164.6135

149.2379  
148.6251

135.1400  
134.5951

123.4067

77.2891  
77.0350  
76.7805

42.1074

36.2500  
36.0392

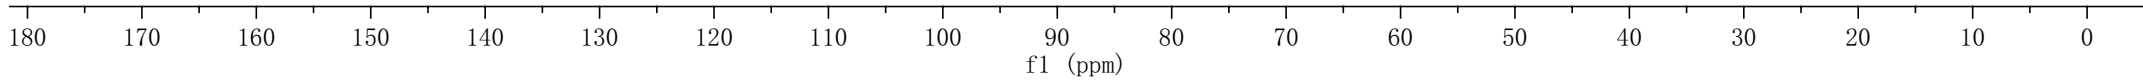

200529

xzp181113-149 CDC13 0529

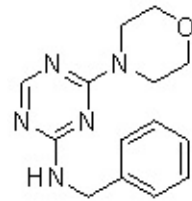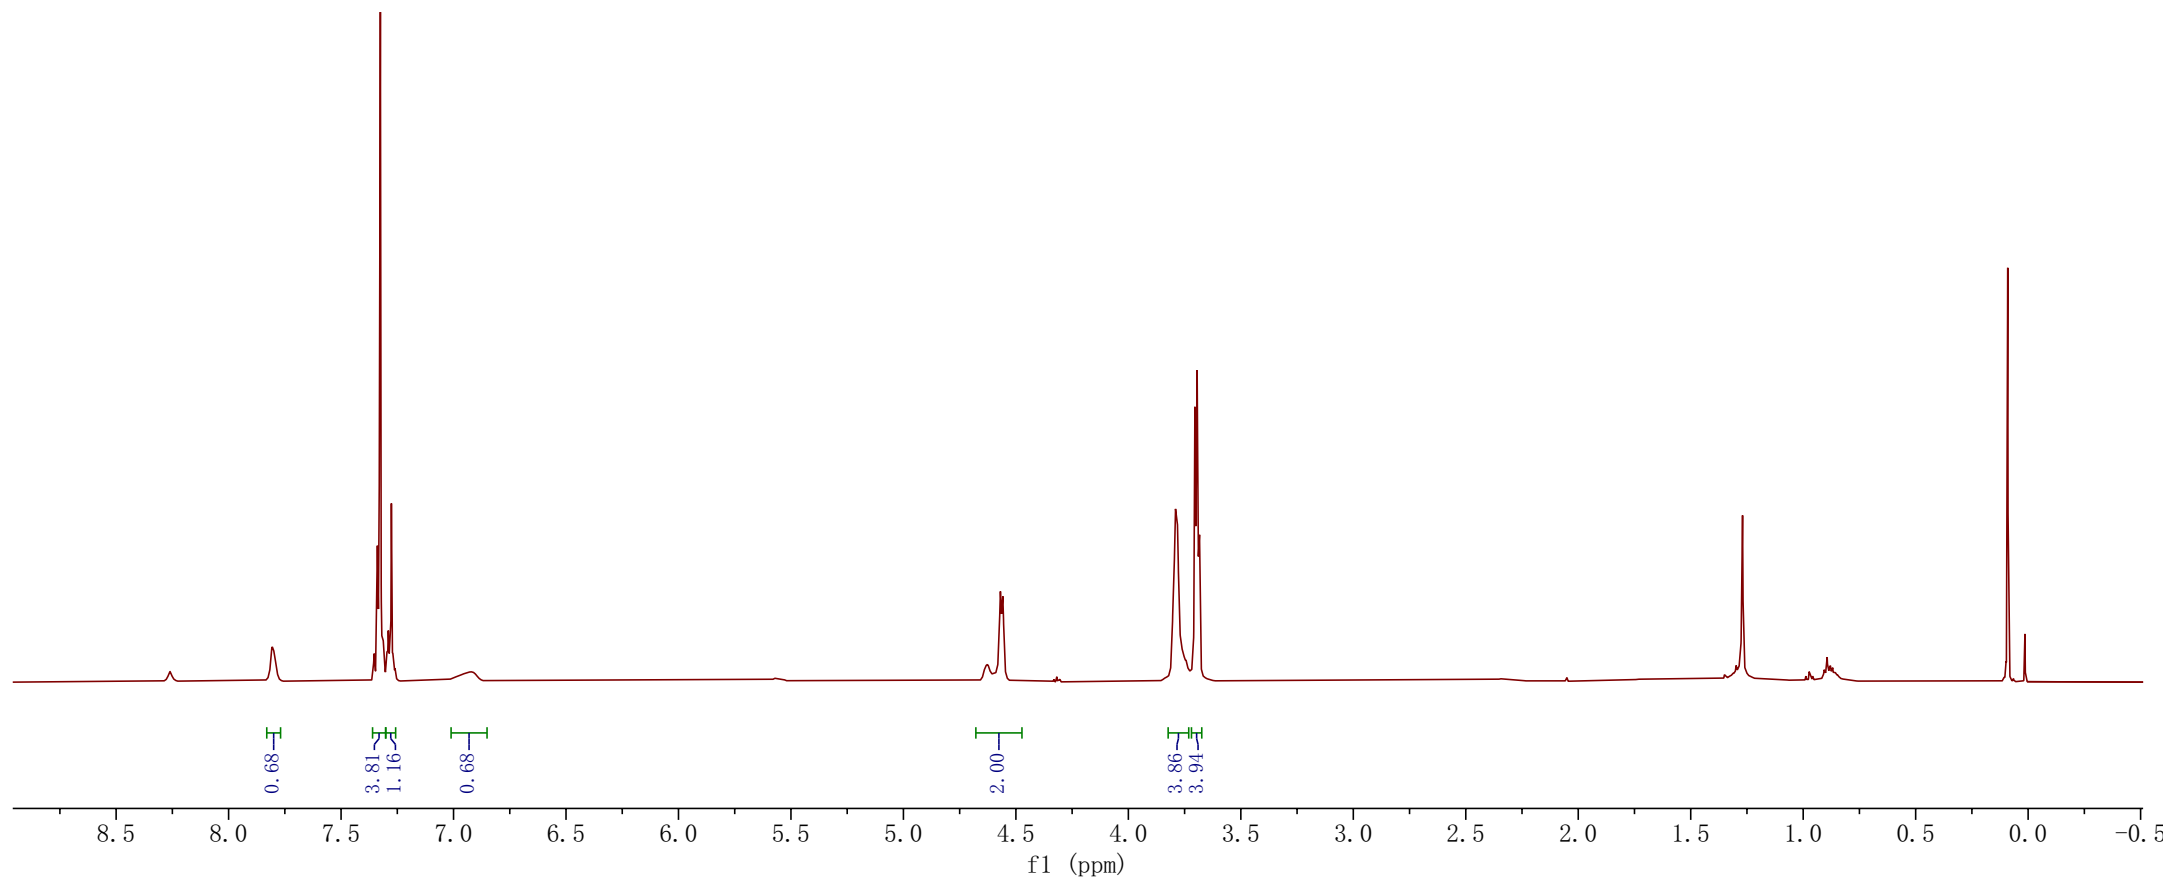

181205  
xzp181114-140 DC13 1205

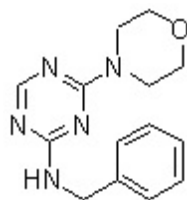

165.9111  
164.9420  
164.0987

138.5987

128.6003  
127.5590  
127.3633

66.6680

44.6374  
43.3783

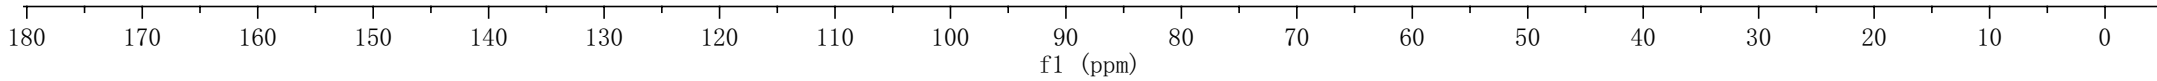

190107  
xzp181122-172

CDC13  
7.3541  
7.3499  
7.3366  
7.3229  
7.2770  
7.2762  
7.2735  
7.2658  
7.2600  
7.2512  
7.2471  
7.2431

5.6755

4.6300  
4.6189

3.1603  
3.1159

2.4490

1.7737  
1.7602  
1.7460  
1.7323

0.9892  
0.9745  
0.9597

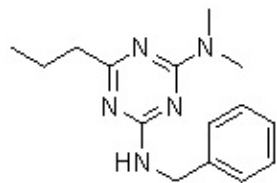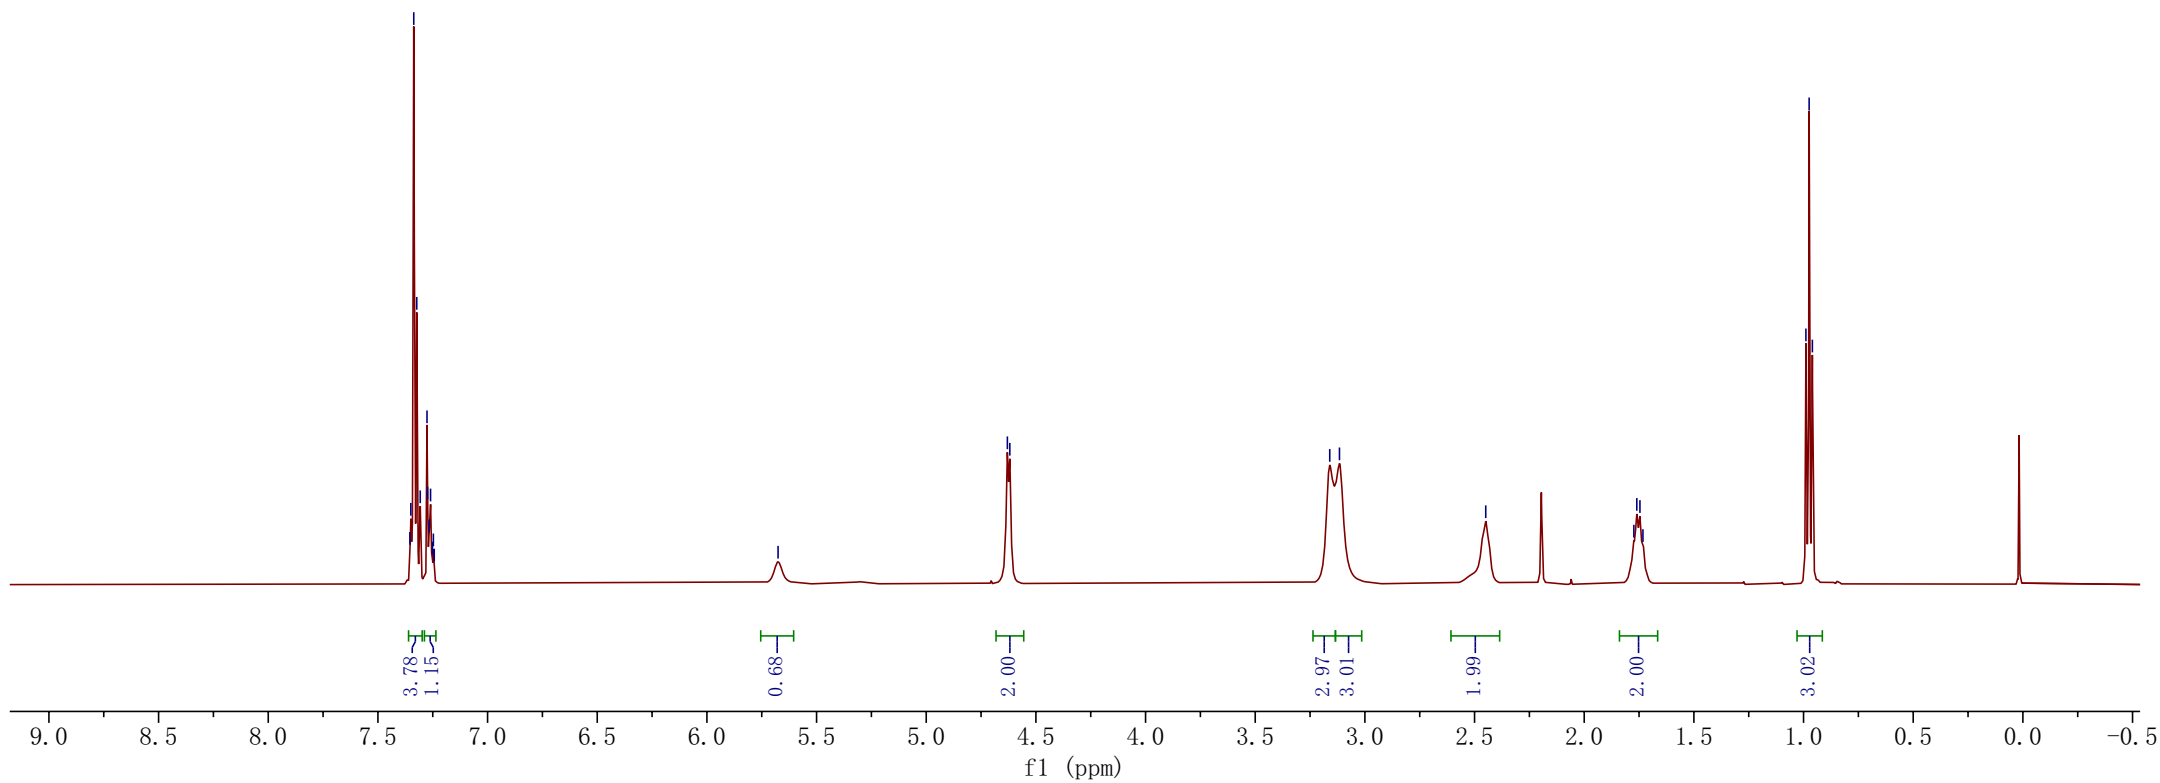

190145  
xzpl81211-172-013 0115

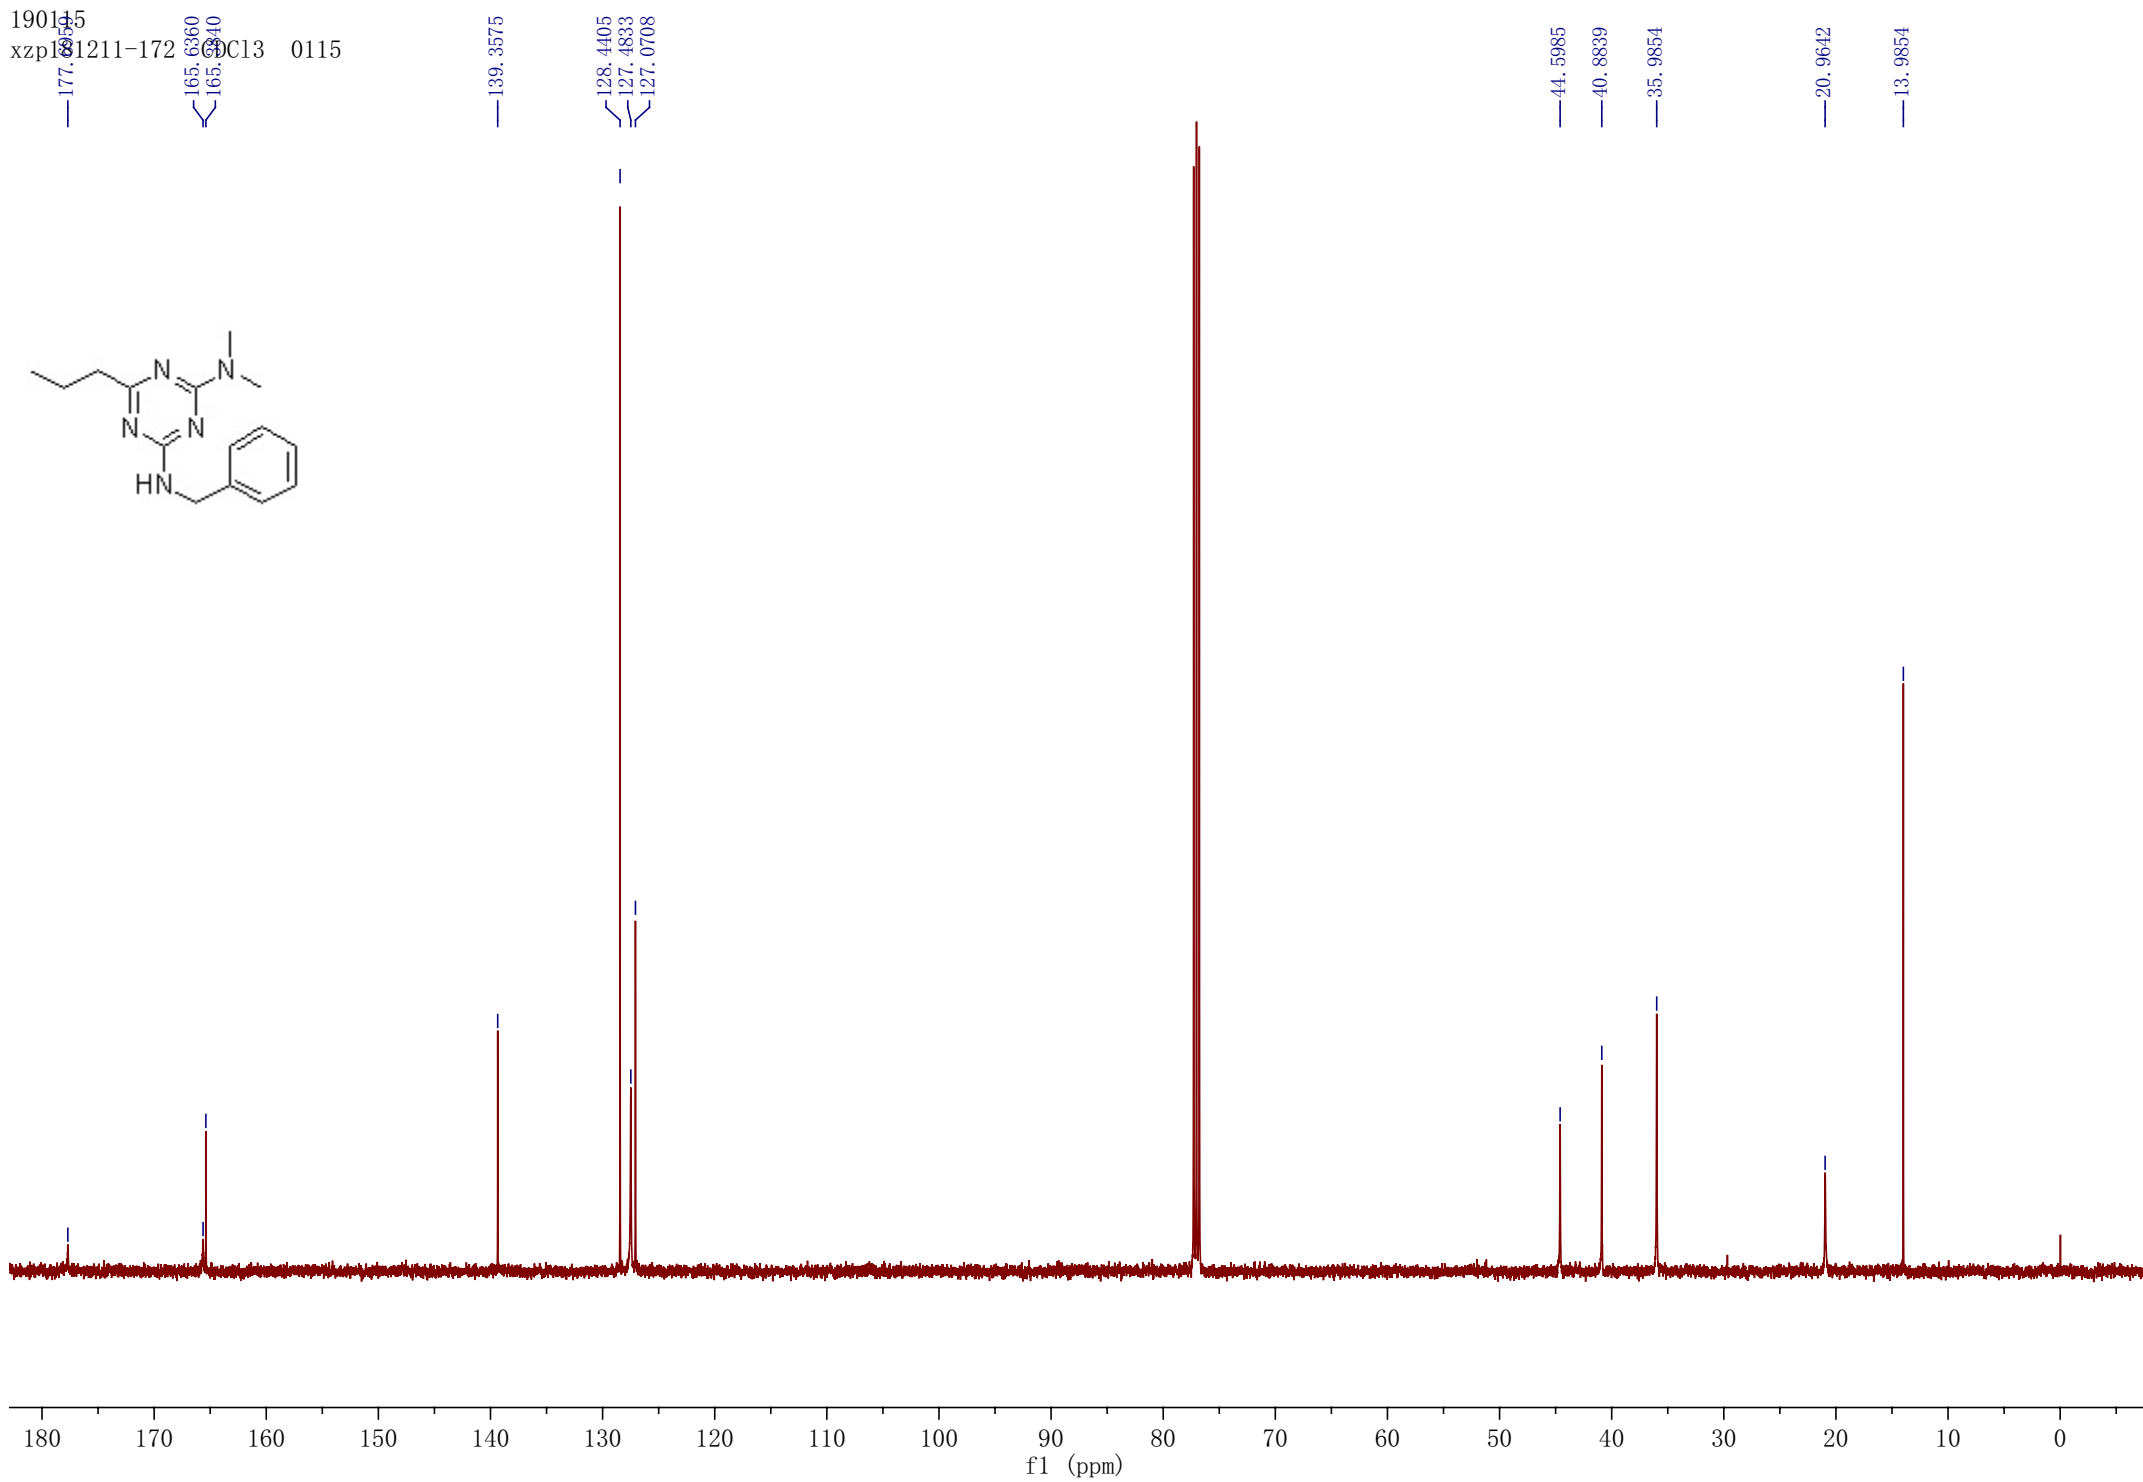

190102  
xzp181116-153 CDC13 0102

8.4643  
8.3854  
7.5095  
7.4952  
7.4813  
7.4661  
7.4510  
7.4372  
7.3755  
7.3573  
7.3428  
7.3275  
7.2944  
7.2845  
7.2800  
7.2658

5.7079  
5.4373

4.7957  
4.6770

3.3120  
3.1906

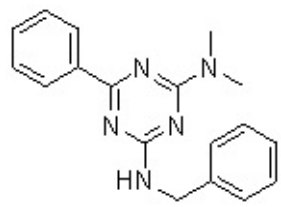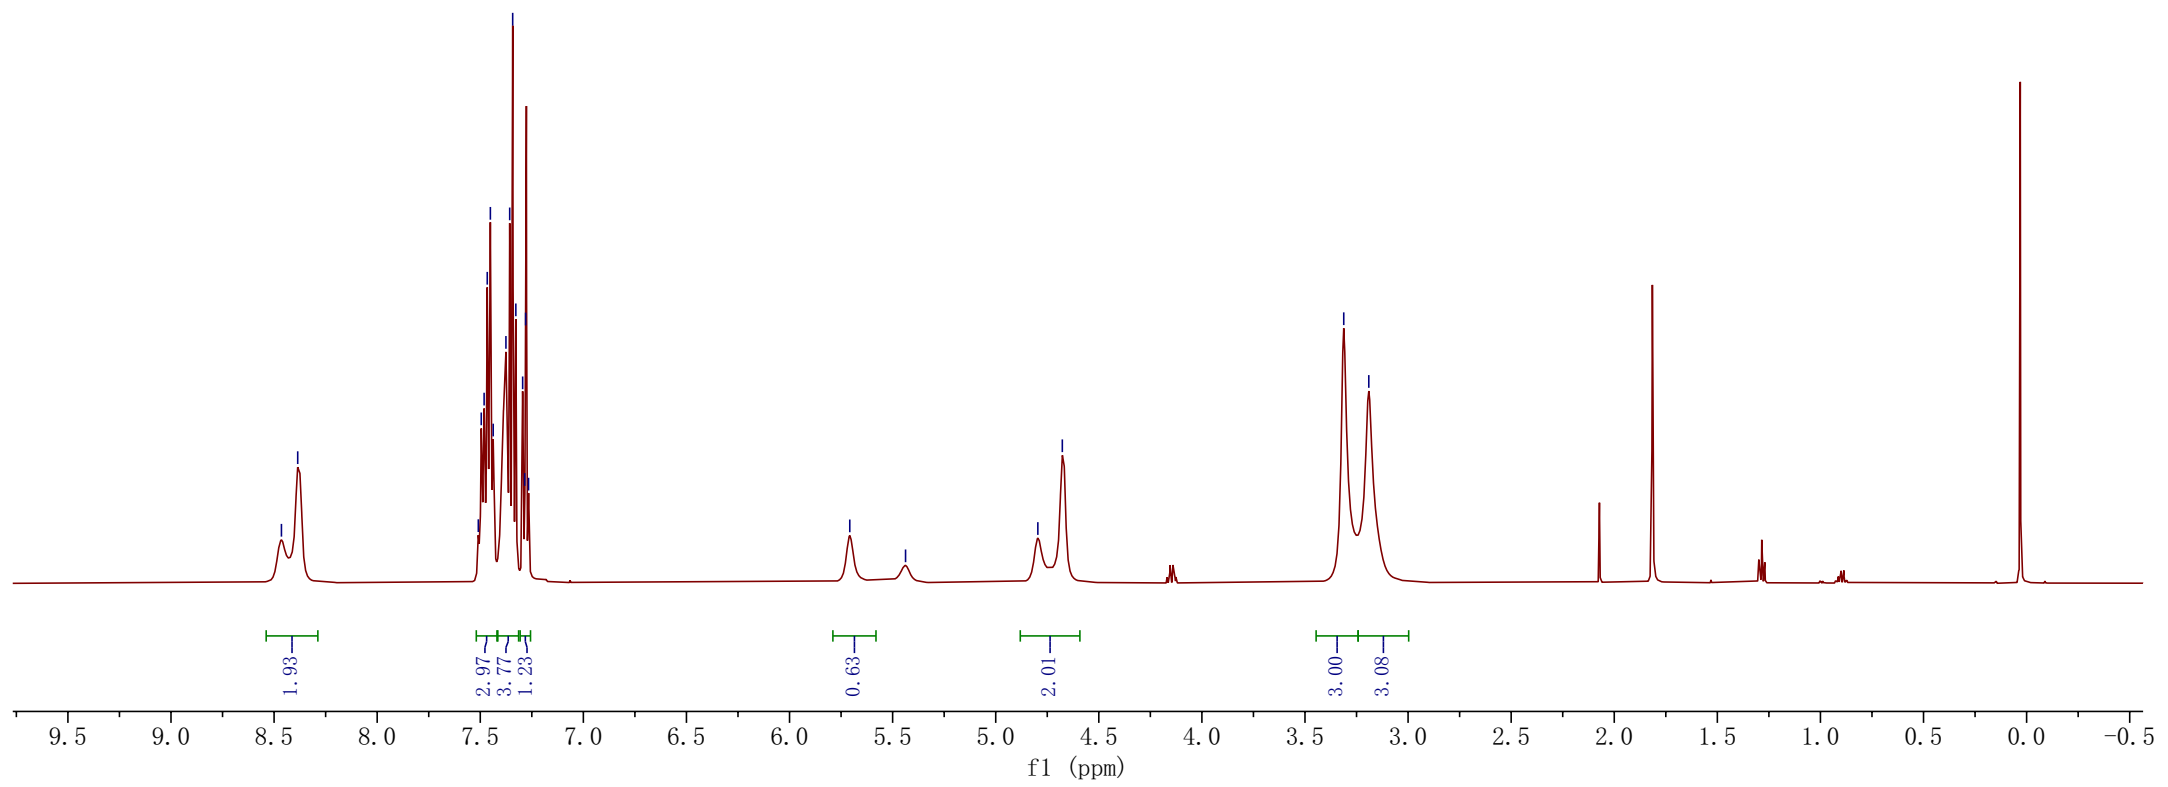



190115  
xzp181116-133 DC13 0115

170.3008  
166.1761  
165.9338  
139.3293  
137.4637  
131.0426  
128.4853  
128.1667  
128.1011  
127.6297  
127.1329

44.8021  
36.1218

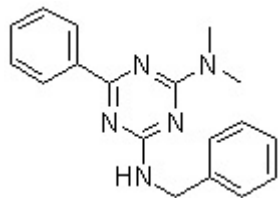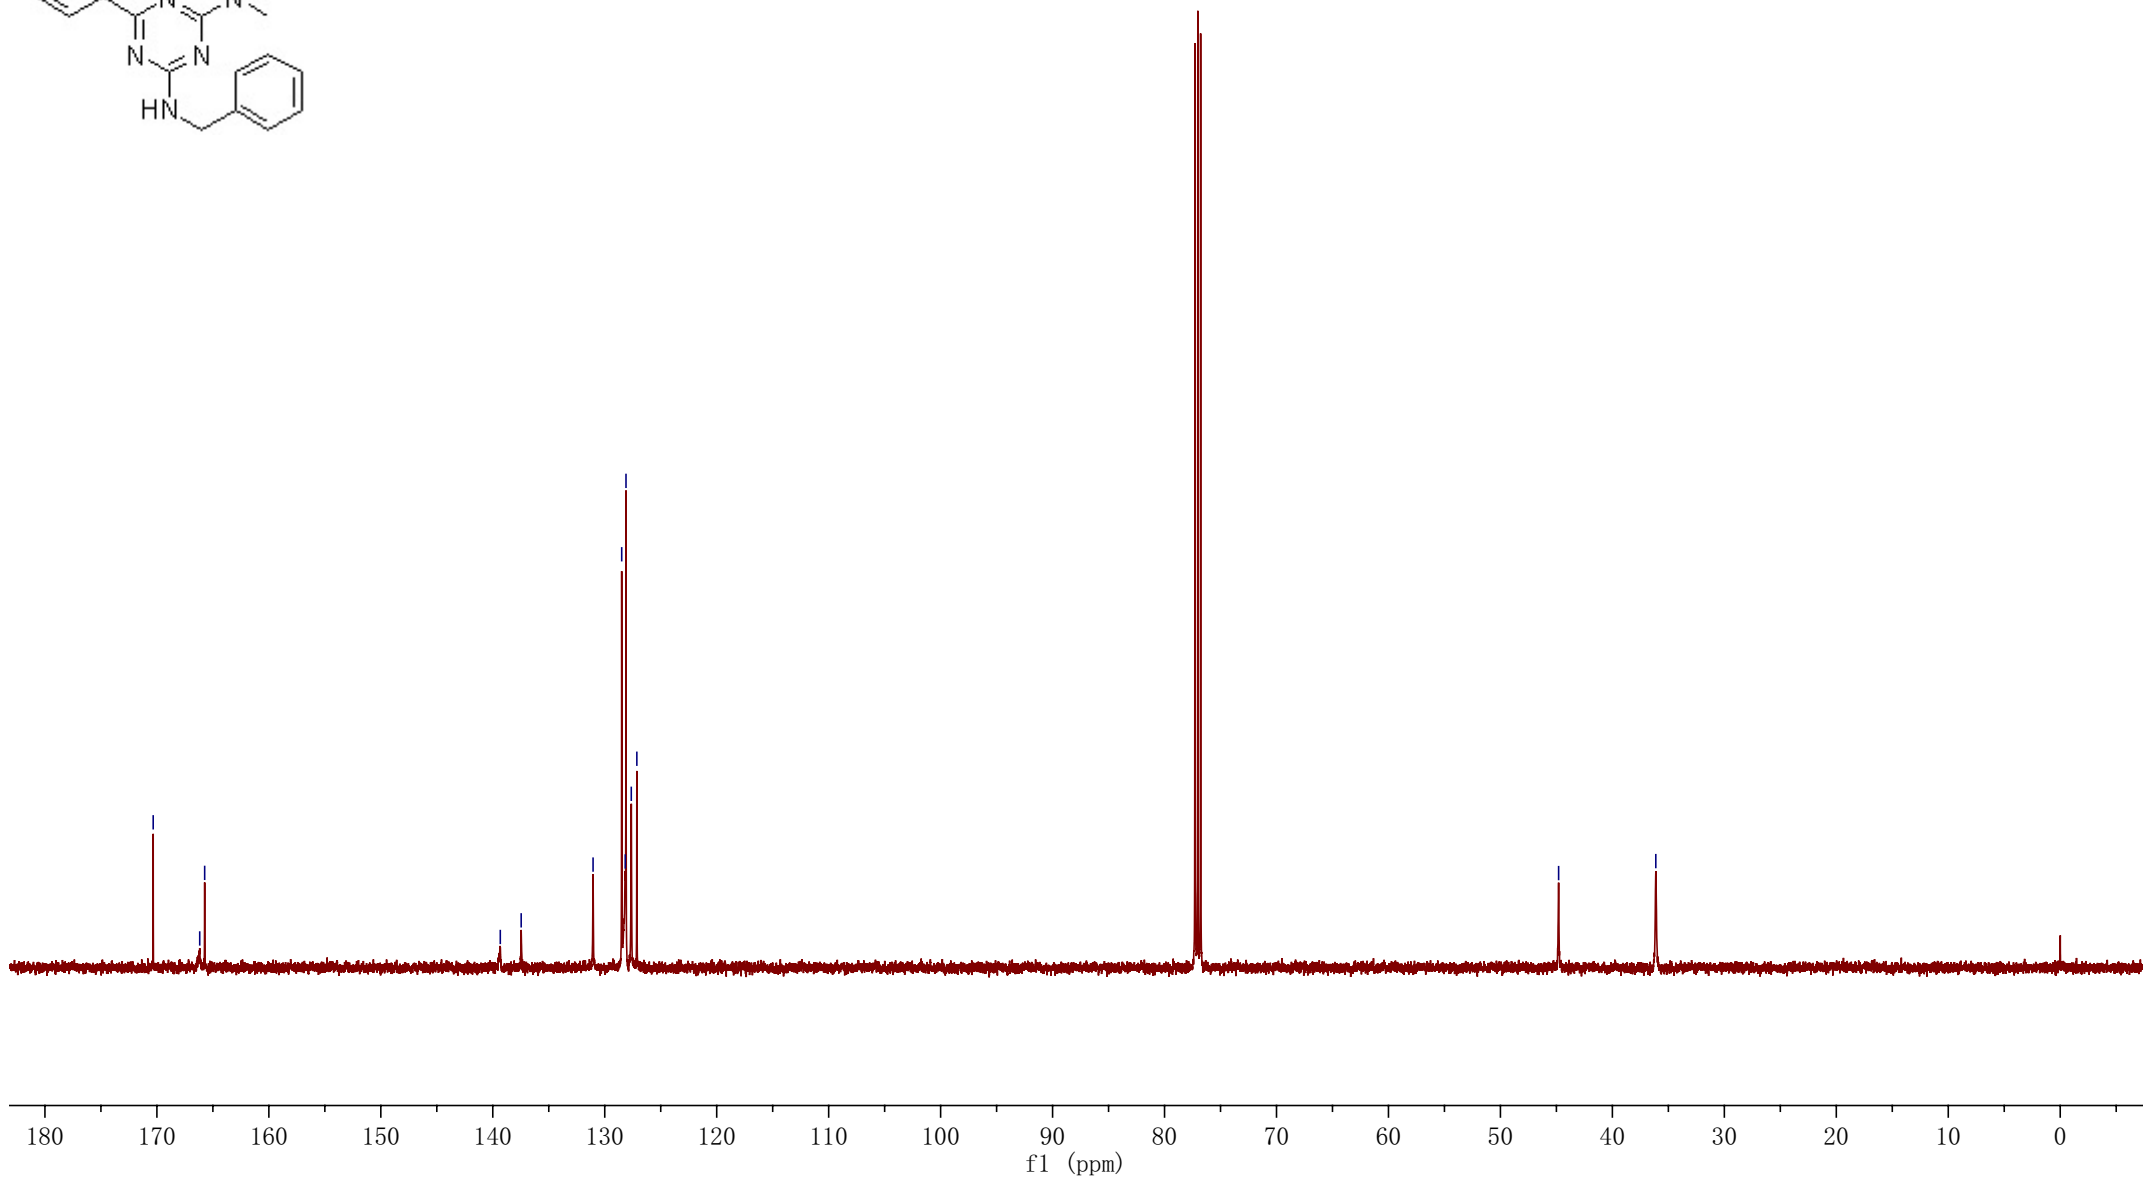

181126

xzq181114-150

CDC13

1126  
7.817  
7.9404  
7.3960  
7.3818  
7.3580  
7.3425  
7.3272  
7.2923  
7.2637  
7.0523  
7.0476  
7.0361  
7.0315

5.5842

4.7787  
4.6830

3.8886

3.3009  
3.1874

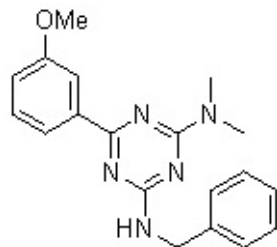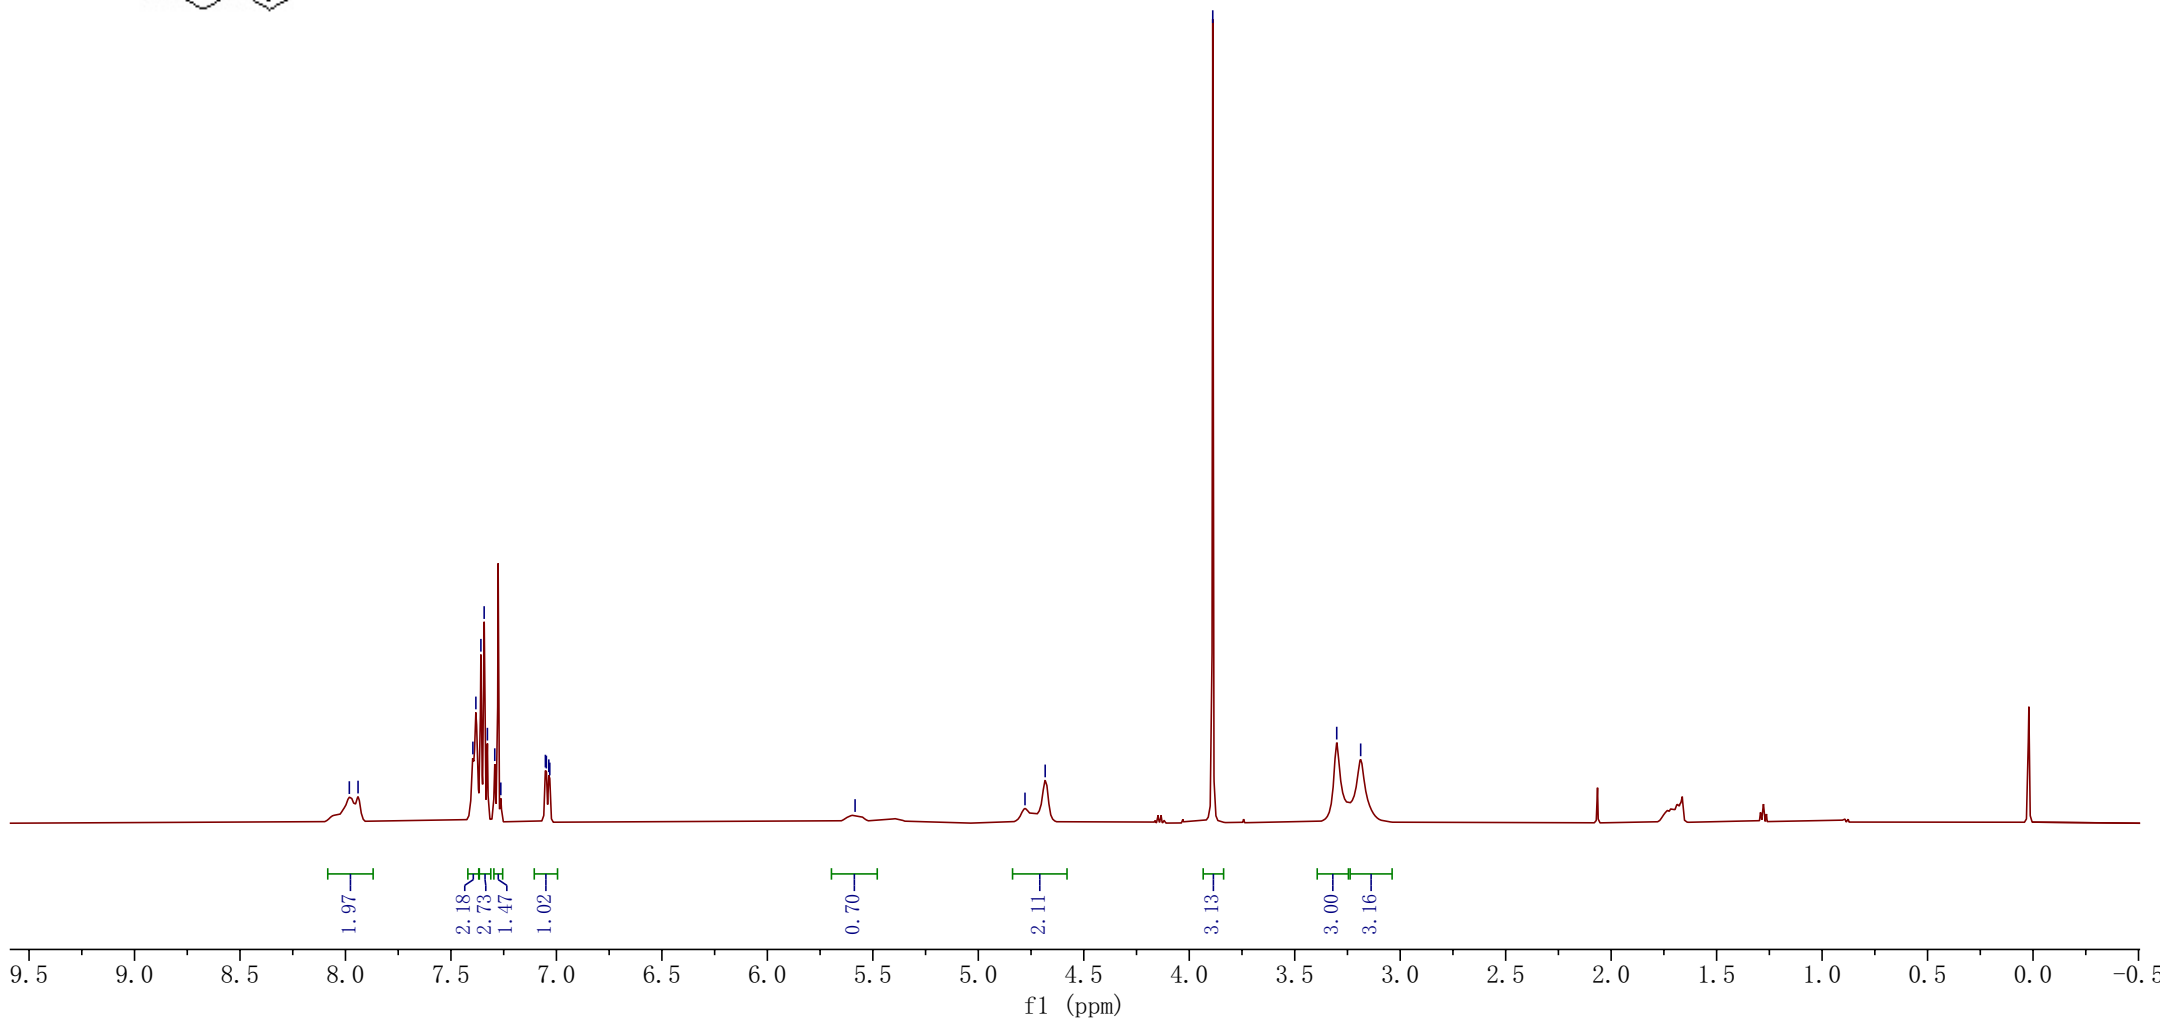

181210  
xzp181114-150

170.6692  
166.5056  
165.7292  
159.1558

139.3494  
138.9592  
129.1215  
128.5251  
127.6618  
127.1865  
120.7227  
117.2853  
112.8724

55.3234  
44.8370  
36.1345

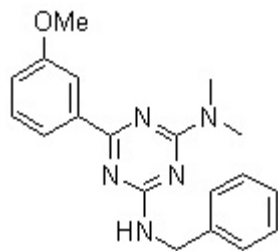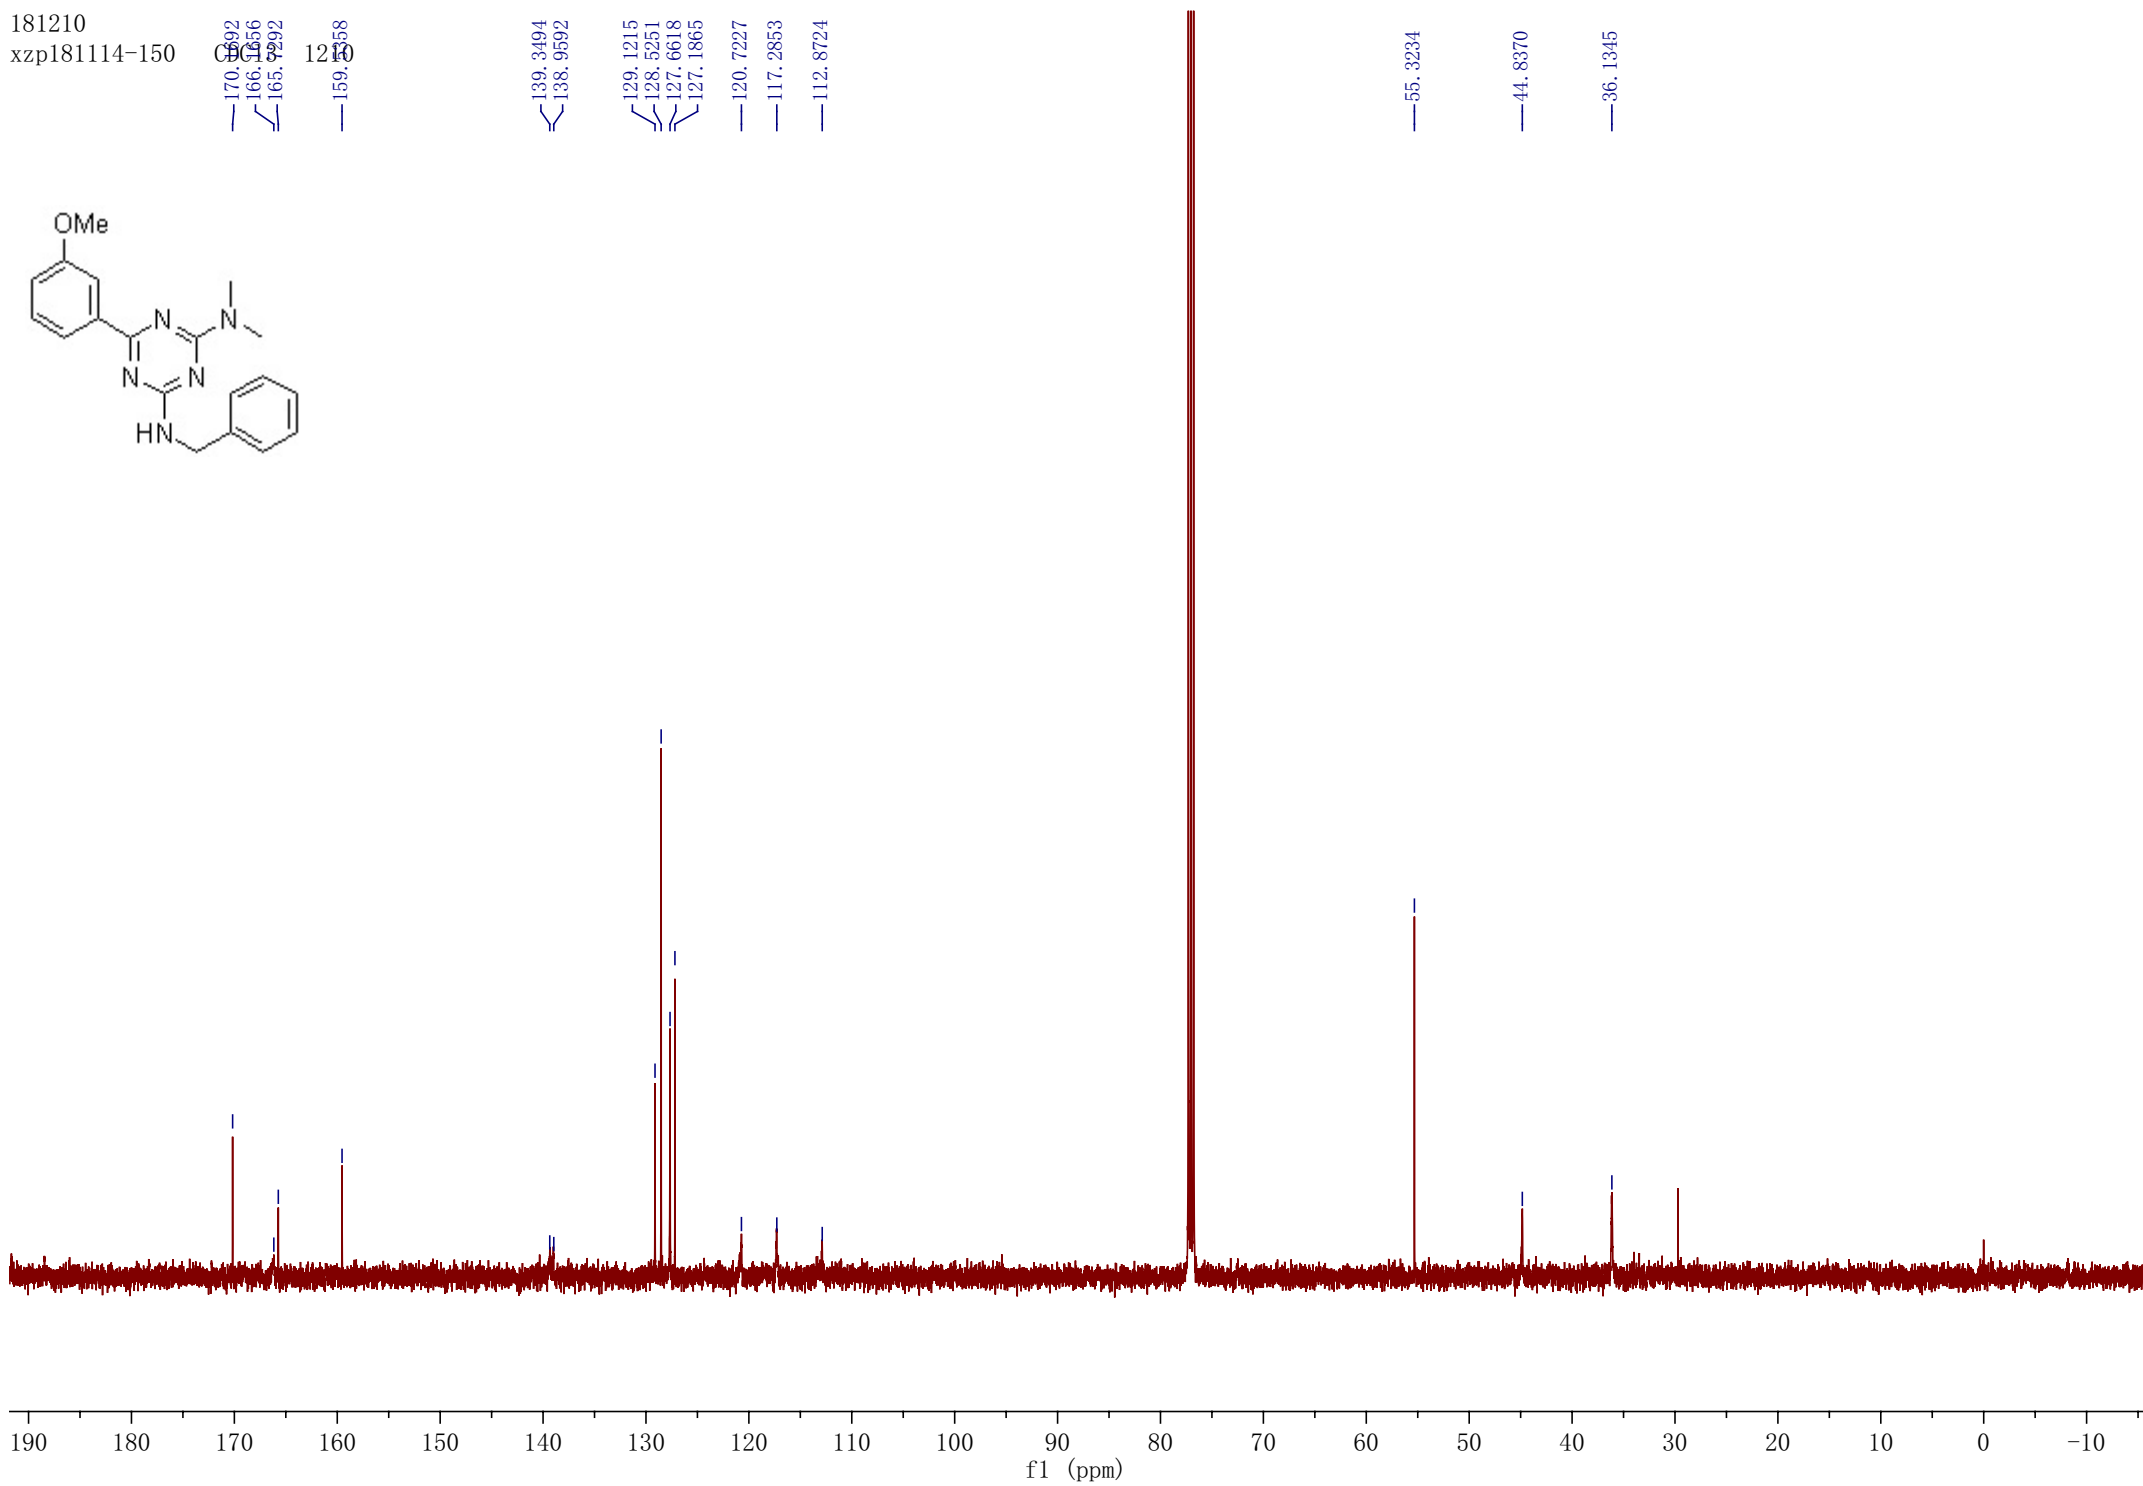

190107

xzpl81119-17

8.768  
8.6624  
8.6047  
8.5901  
8.5896  
7.7379  
7.5699  
7.5552  
7.5413  
7.5270  
7.5226  
7.4146  
7.4004  
7.3794  
7.3757  
7.3652  
7.3625  
7.3500  
7.3239  
7.3143  
7.3097  
7.3047  
7.2978  
7.2953  
6.2194  
6.2077  
6.1959

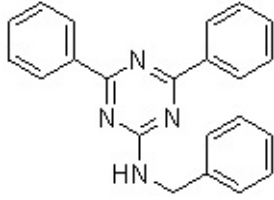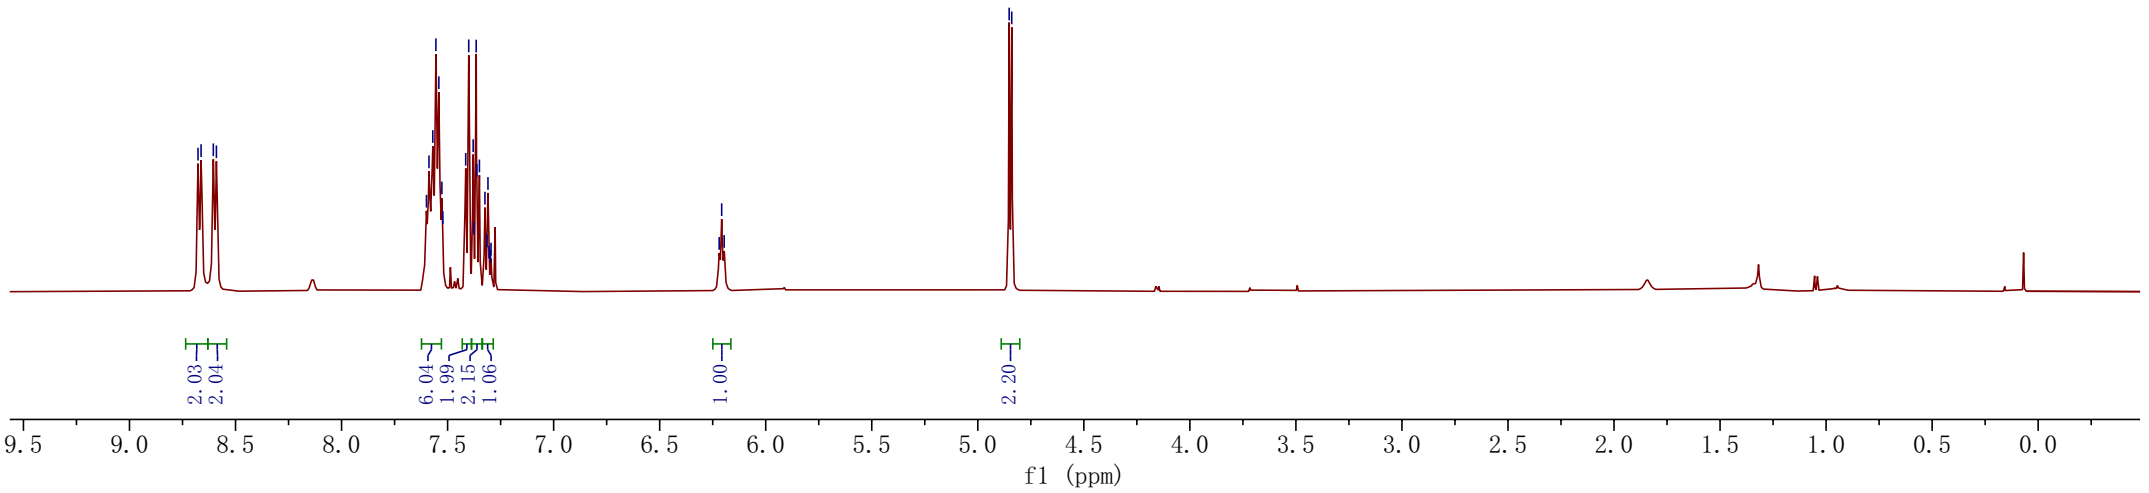

200612

XZP200113-141

171.5701  
171.3277

166.6839

CDCl<sub>3</sub>

0612

138.5553

136.7434

136.5447

131.9473

131.8623

128.7847

128.7199

128.5758

128.3835

127.7317

127.5226

45.0747

29.7095

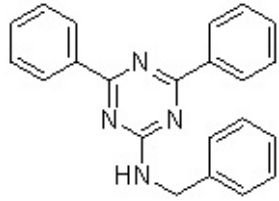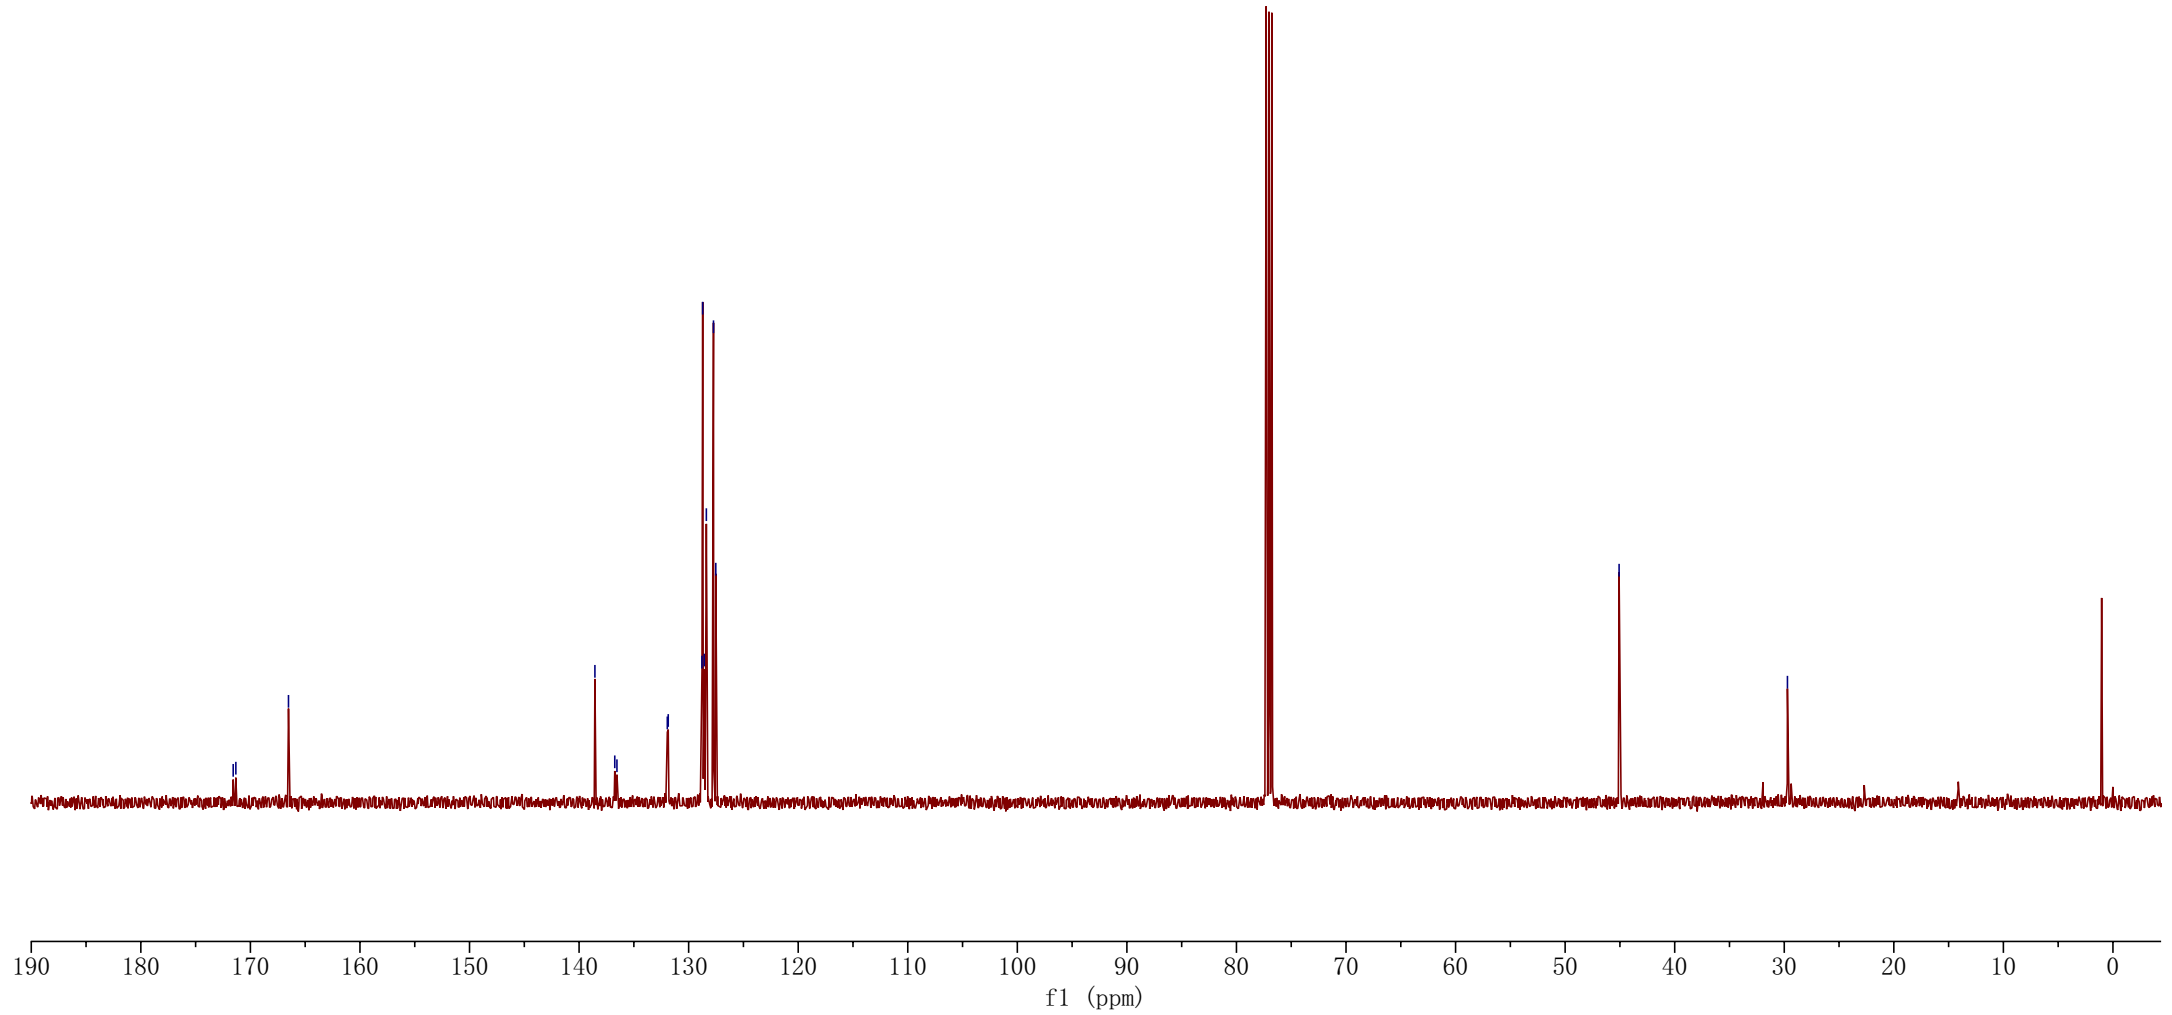

190916

xzpl90711-59

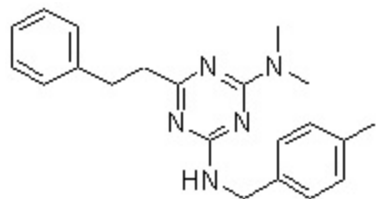

7.3100  
7.2983  
7.2942  
7.2812  
7.2683  
7.2494  
7.2335  
7.2161  
7.2116  
7.2040  
7.1990  
7.1928  
7.1862  
7.1817  
7.1541  
7.1384

5.5505

4.5977  
4.5877

3.1589  
3.0856

2.8221

2.3569

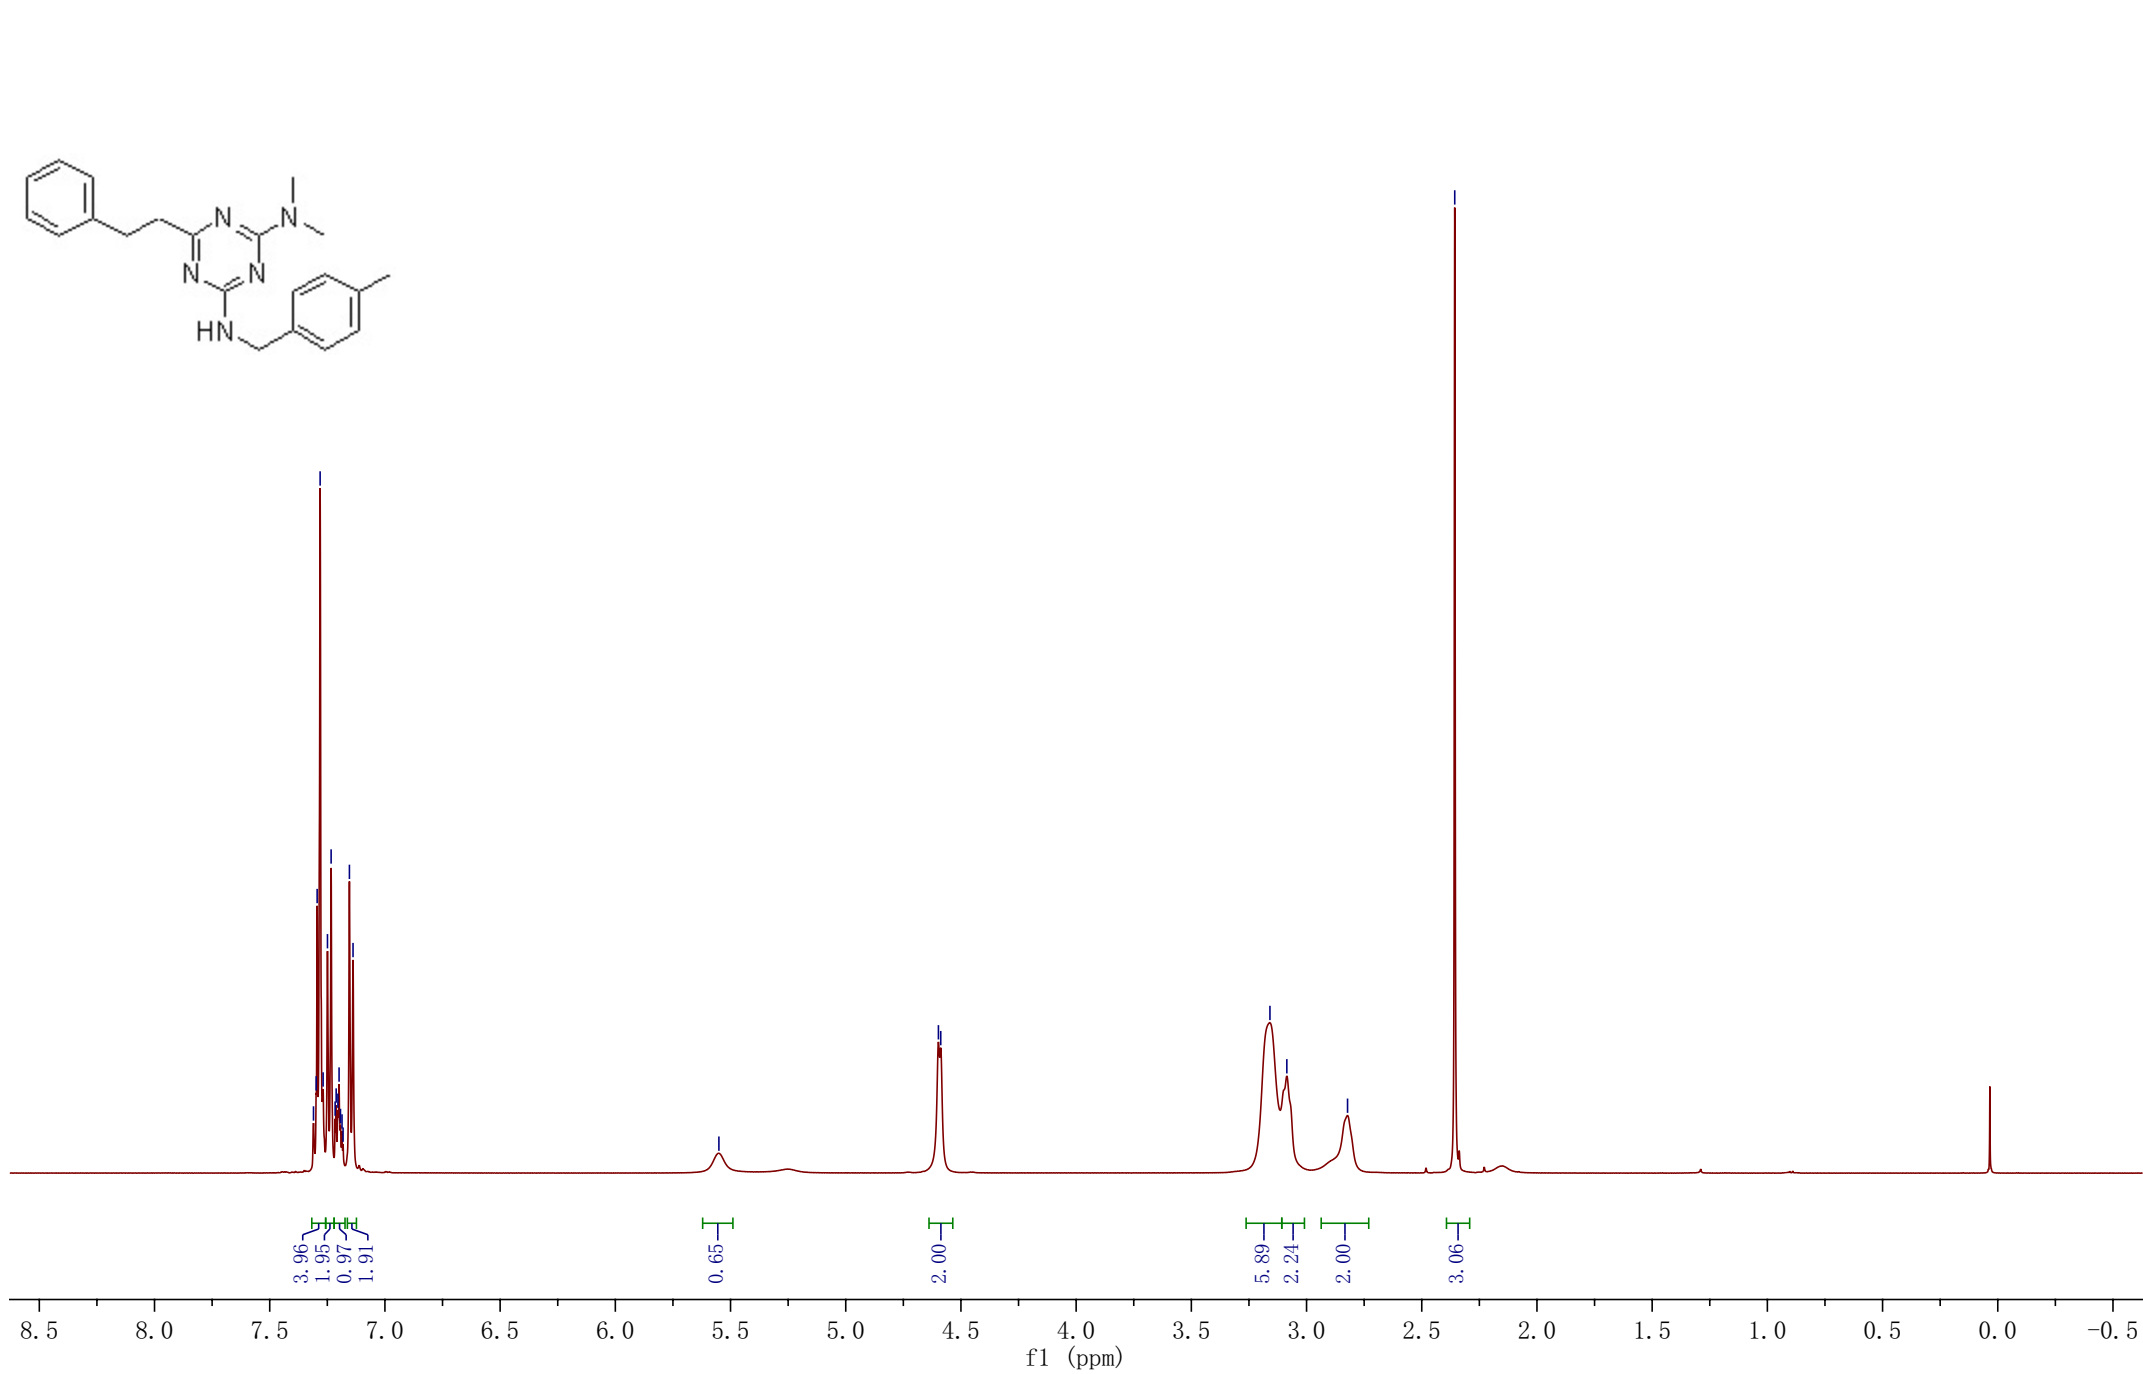

3.96  
1.95  
0.97  
1.91

0.65

2.00

5.89  
2.24  
2.00

3.06

190919  
xzp190911-59  
176.8992  
165.5804  
165.3808 CDC13

0919

141.9807

136.7381  
136.1968

129.1502  
128.4415  
128.2400  
127.5391  
125.7262

44.4106

40.2458

36.0141

33.3359

21.0707

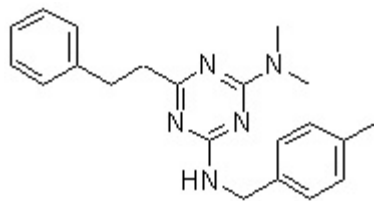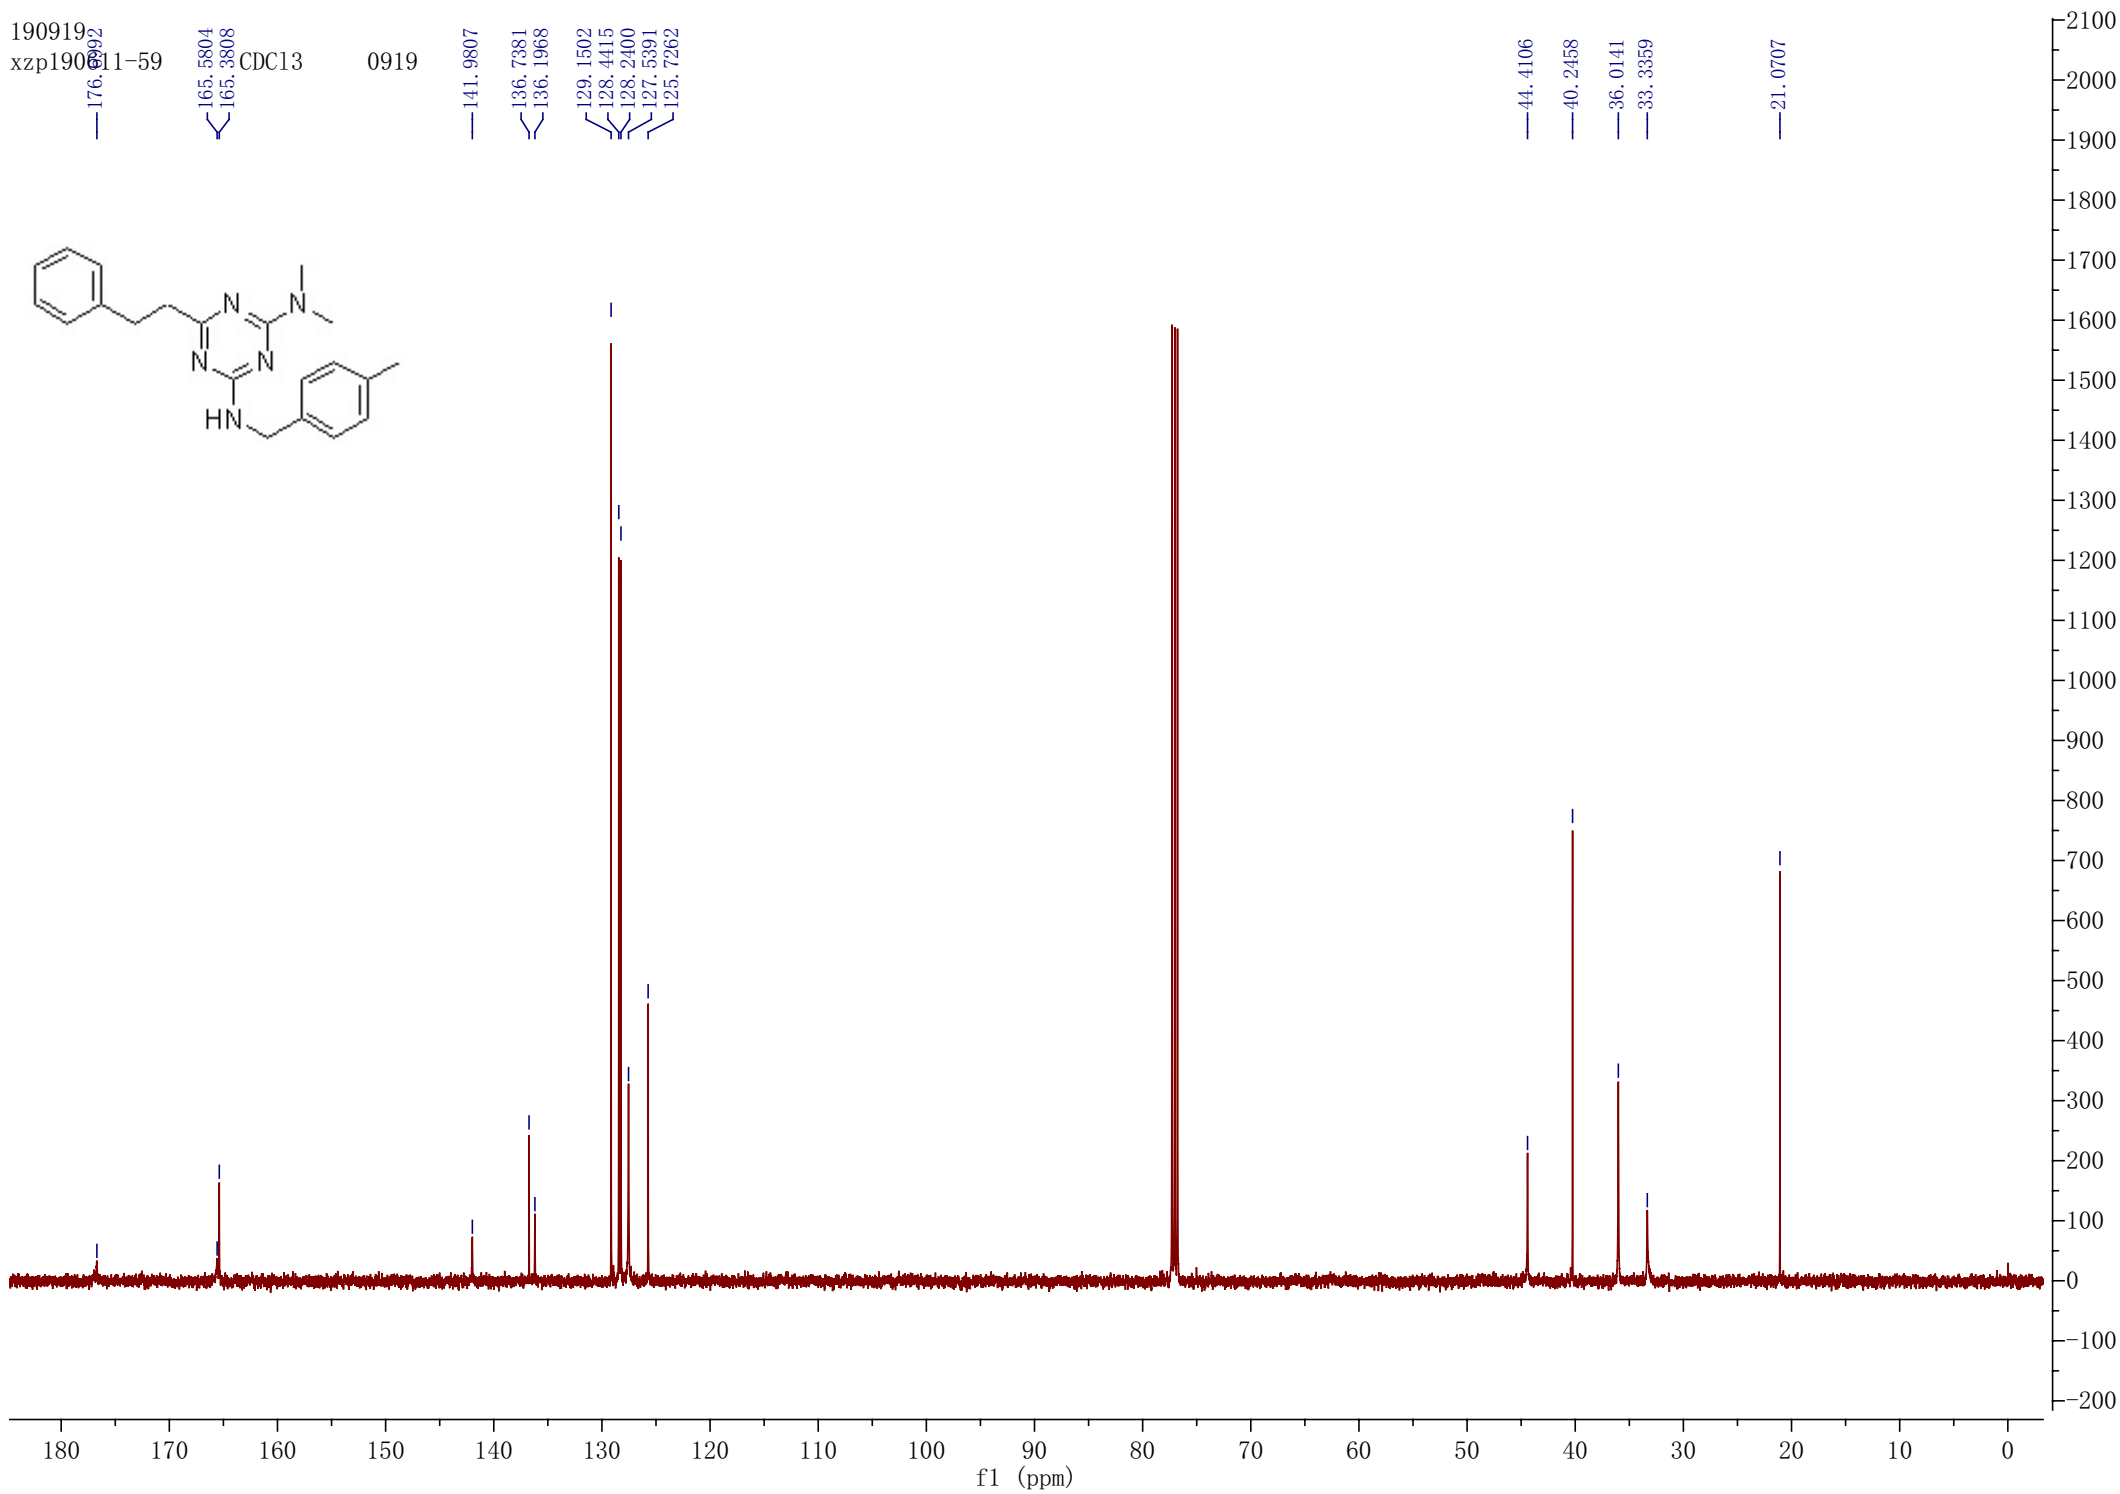

190002  
x 20  
7.2033  
7.19092  
7.1779  
7.1757  
7.1590  
7.1493  
7.2048  
7.1972  
7.1922  
7.0896  
7.0857  
6.8718  
6.8622  
6.8584  
0902

5.4635

4.5594  
4.5494

3.8099

3.1656  
3.0743

2.8114

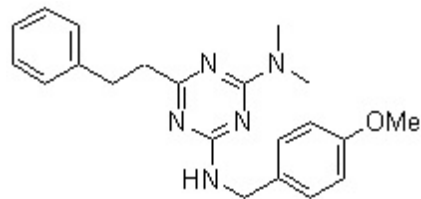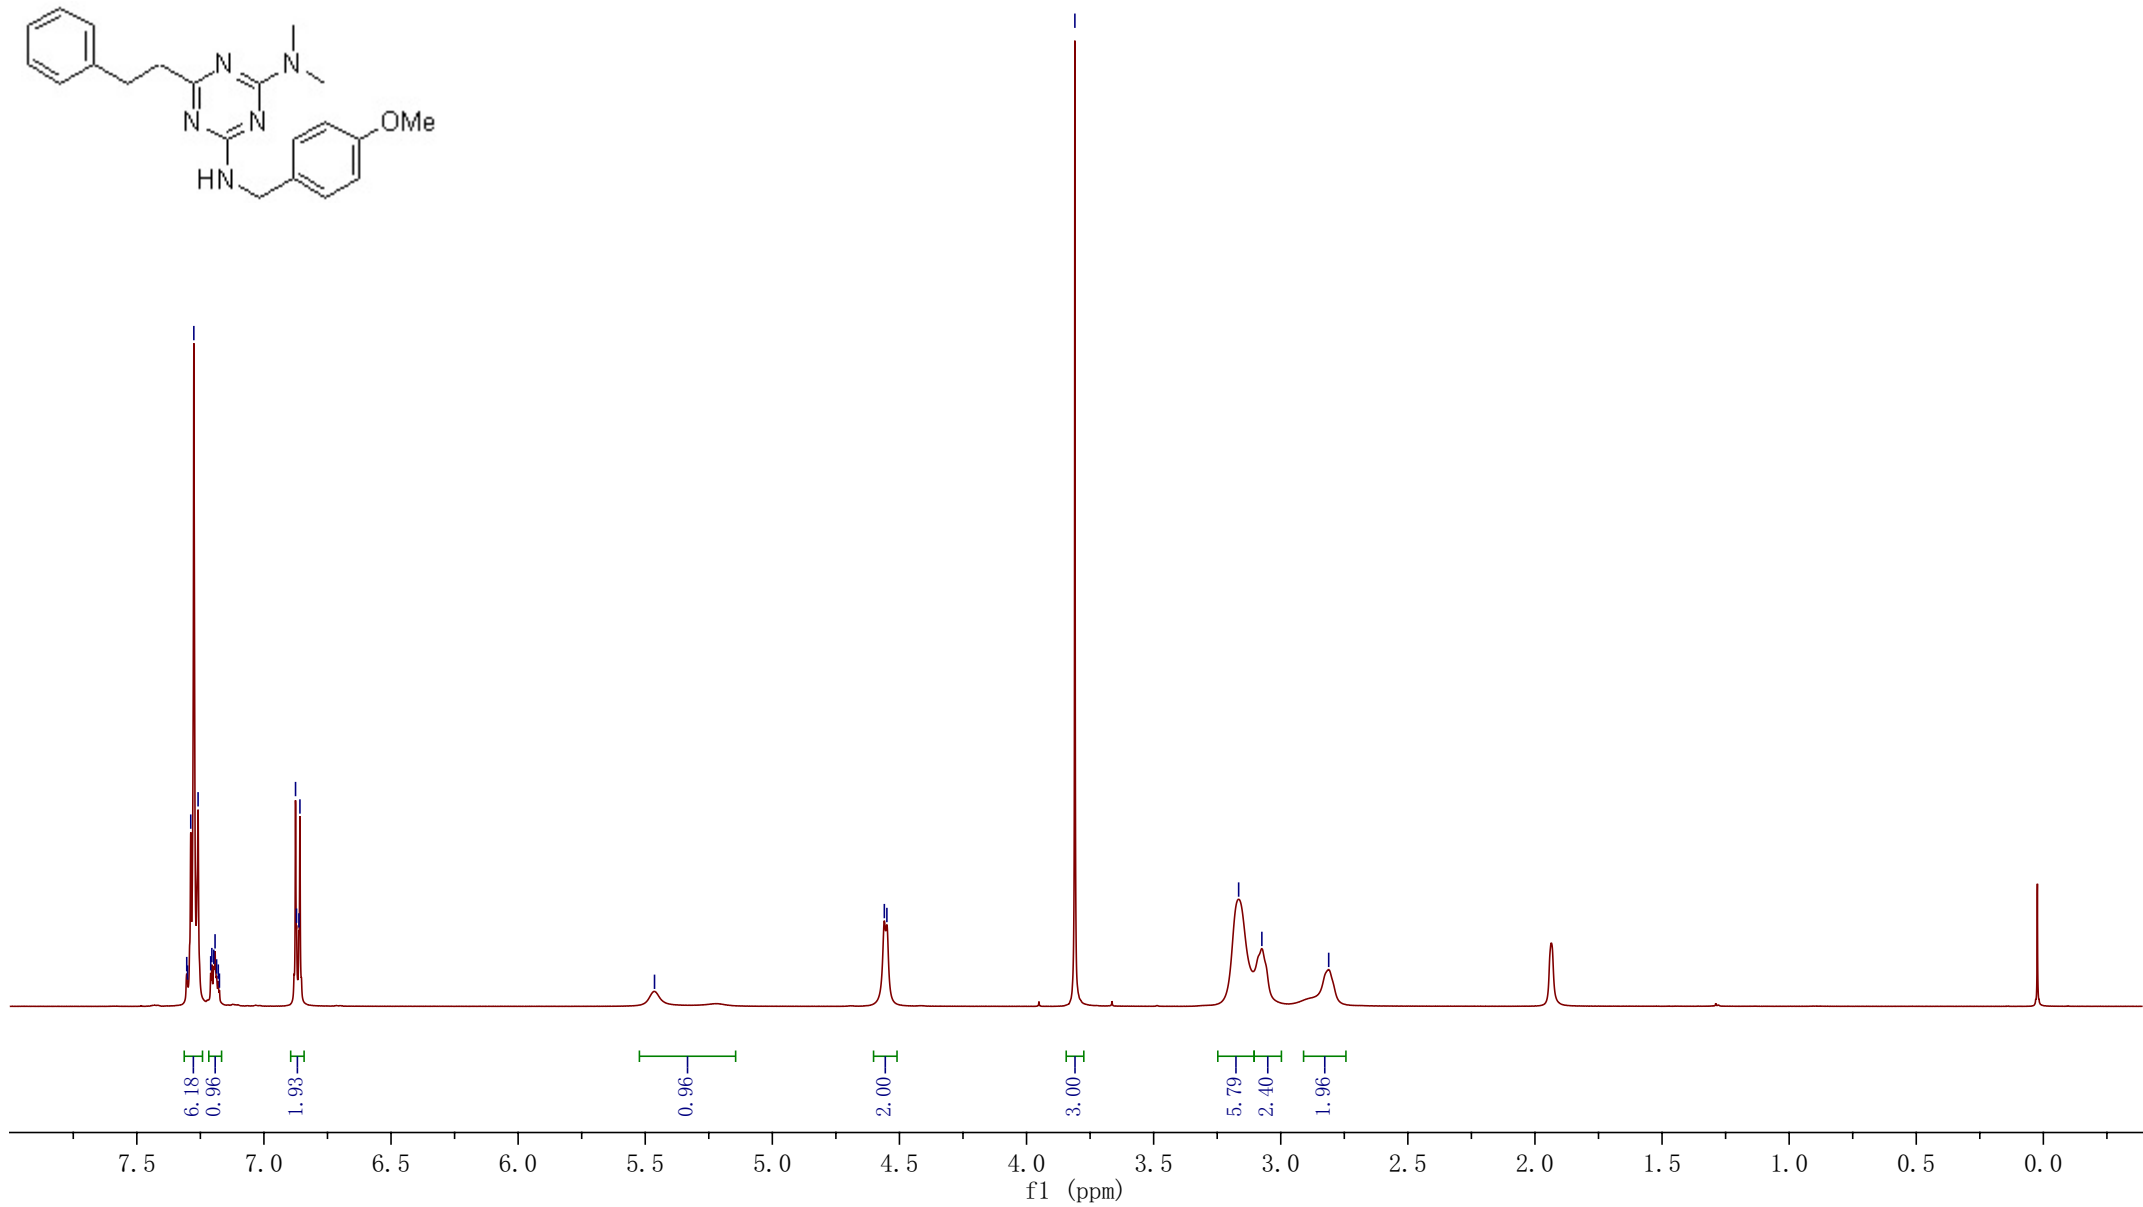



190909

xzp190703-78

0909

165.5676  
165.5529  
165.5919  
158.8238

141.9994

131.3354  
128.8982  
128.4549  
128.2594  
125.7474

113.9094

55.2780

44.1597

40.2712

36.0445

33.3701

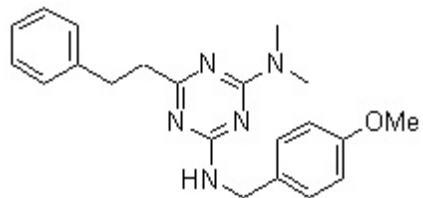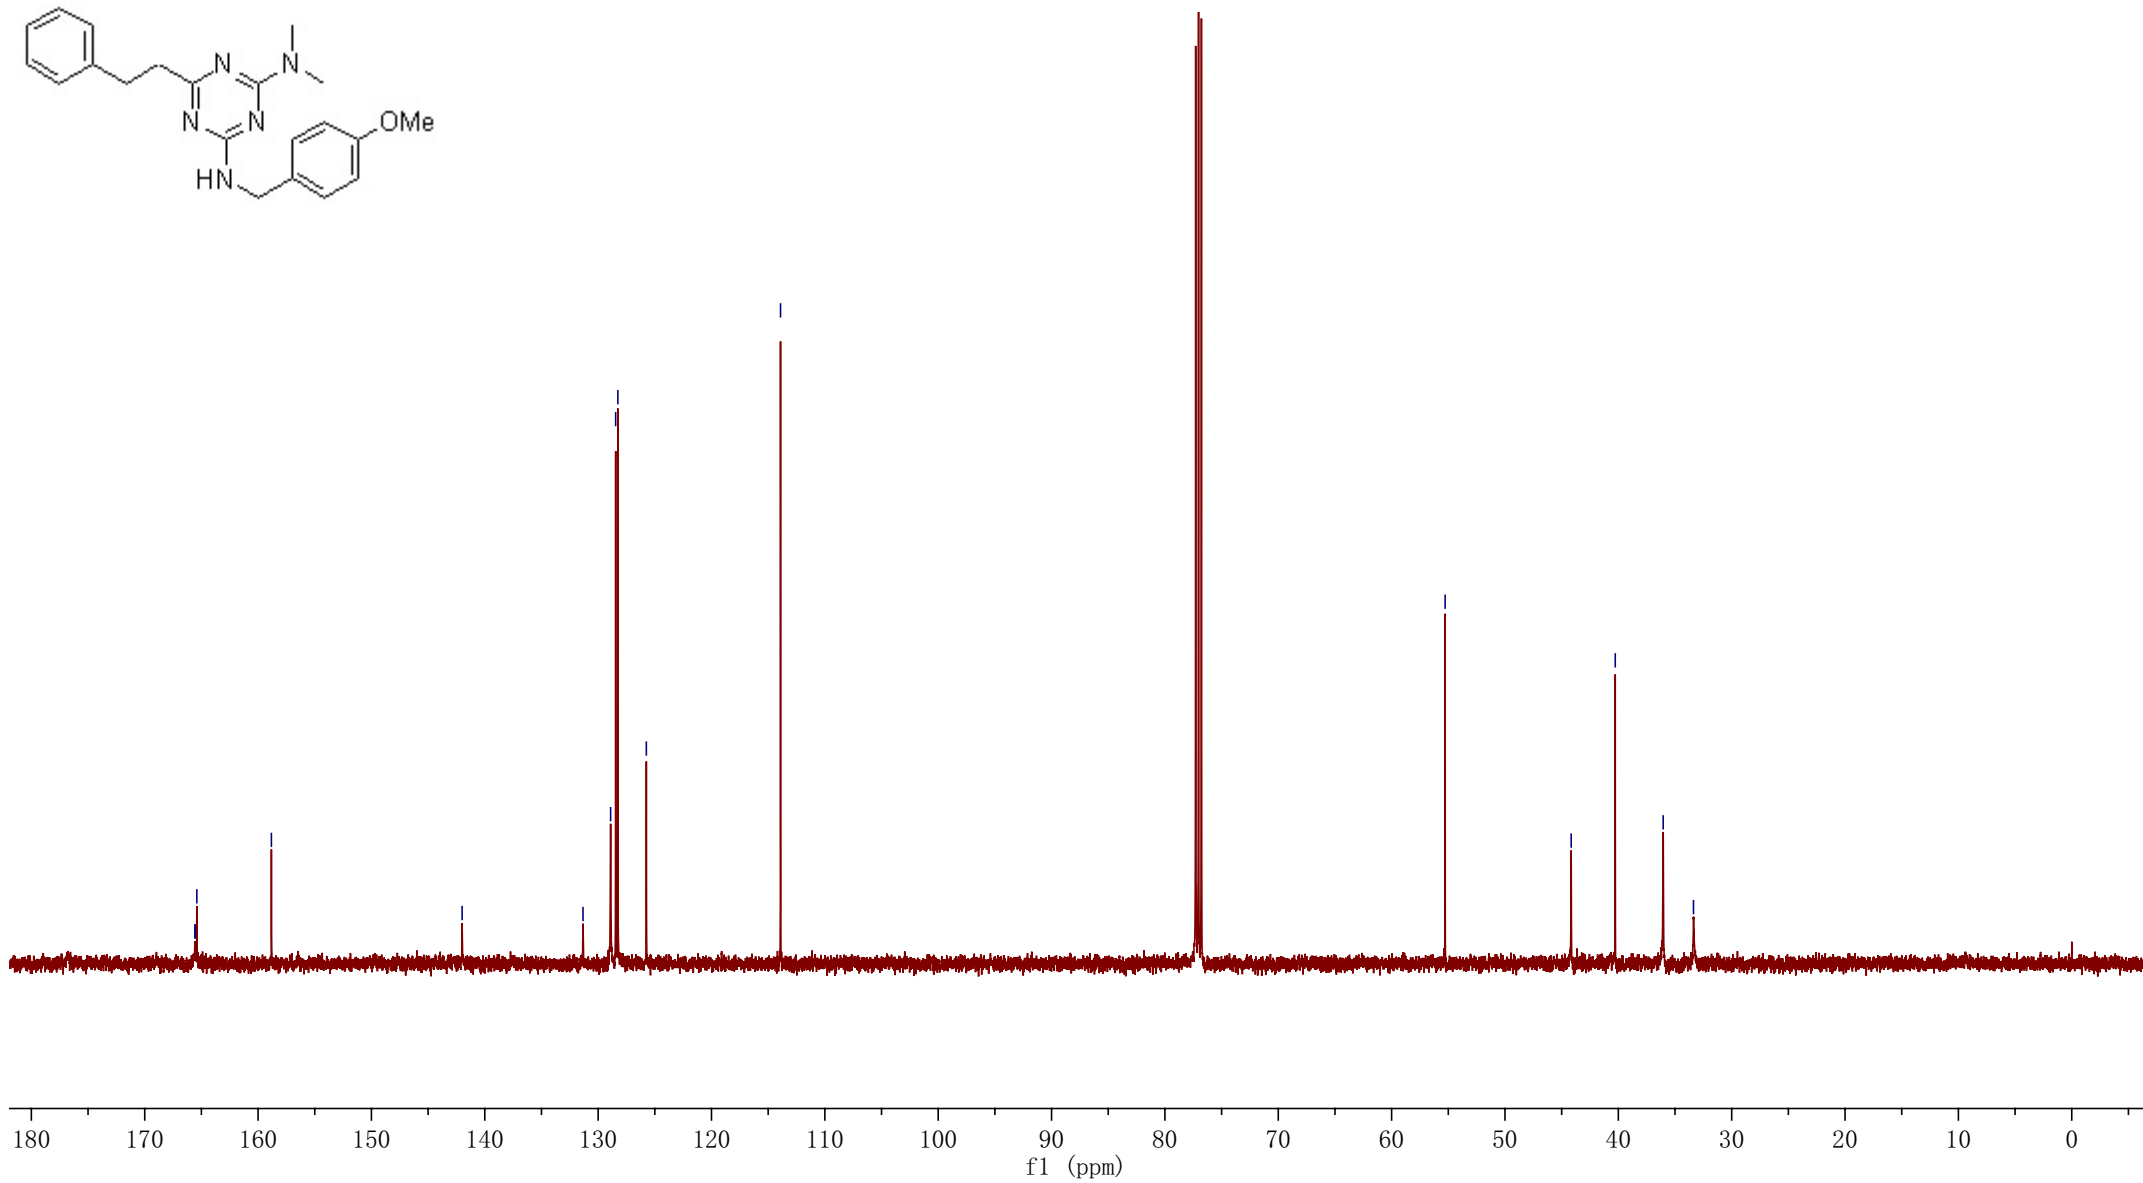

190909  
xzp190703-79

7.4479  
7.4312  
7.3889  
7.3335  
7.2758  
7.2696  
7.2599  
7.1666  
7.1333  
7.1057  
7.1965  
7.1920  
7.1816  
7.1780

5.6179

4.5705  
4.5607

3.1737  
3.0860  
3.0707  
3.0533  
2.8138

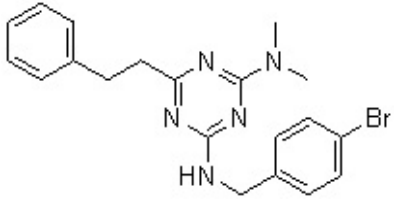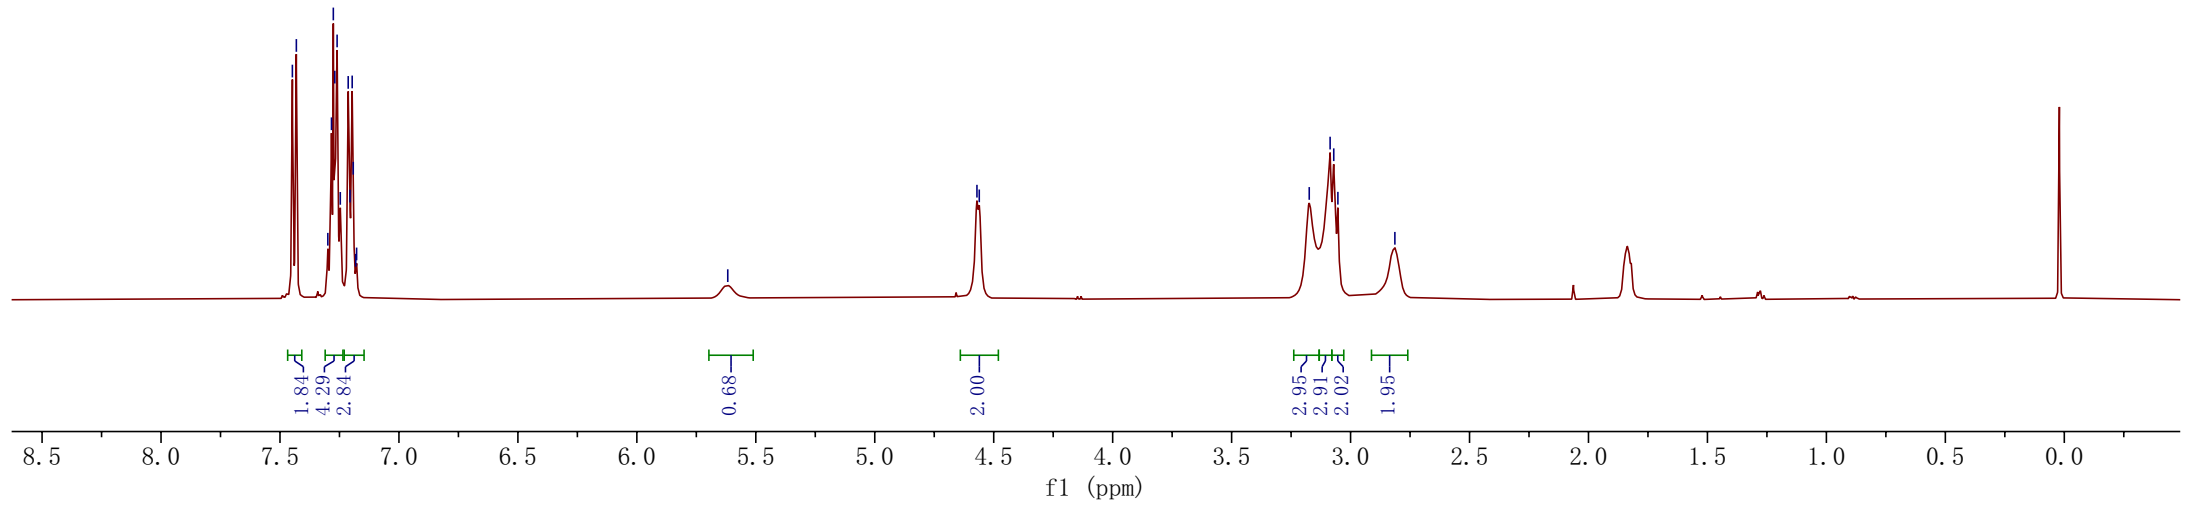

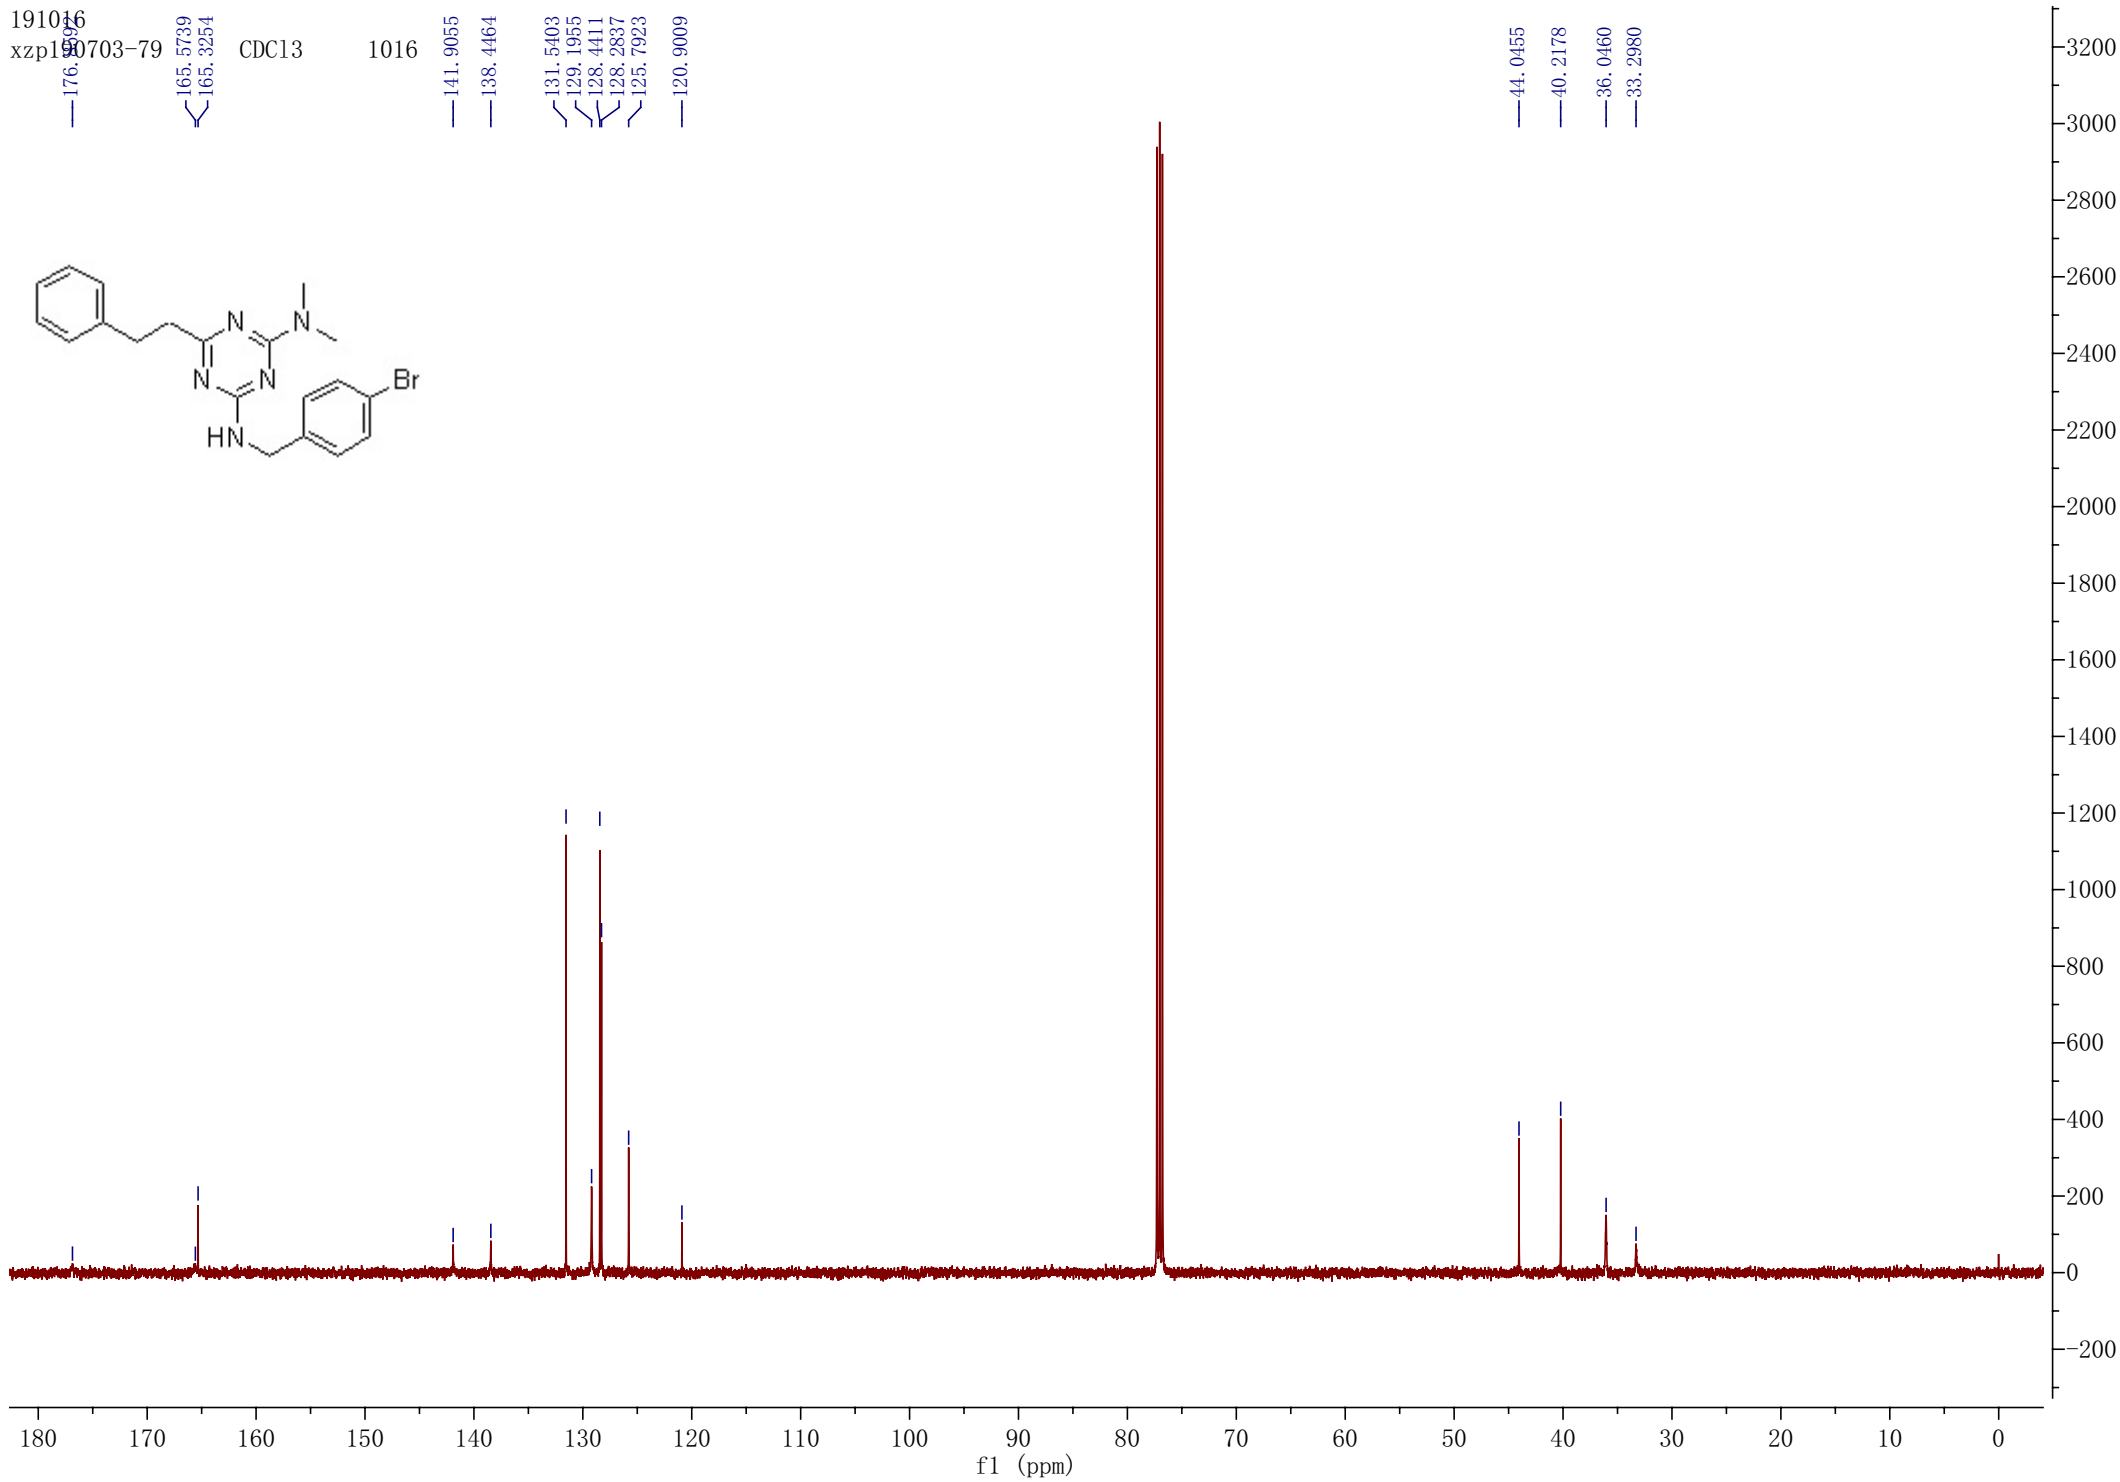

191031  
xzp190604

7.4119  
7.3762  
7.4650  
7.4501  
7.4354  
7.4117  
7.3866  
7.3621  
7.3376  
7.3332  
7.3140  
7.3301  
7.3262  
7.3181  
7.3143  
7.3037  
7.2869  
7.2823  
7.2761  
7.2717  
7.2693  
7.2562

— 5.6610

< 4.6429  
< 4.6310

< 3.2862  
< 3.1601  
< 3.1392

— 2.8268

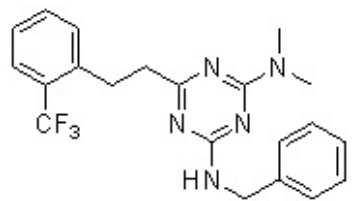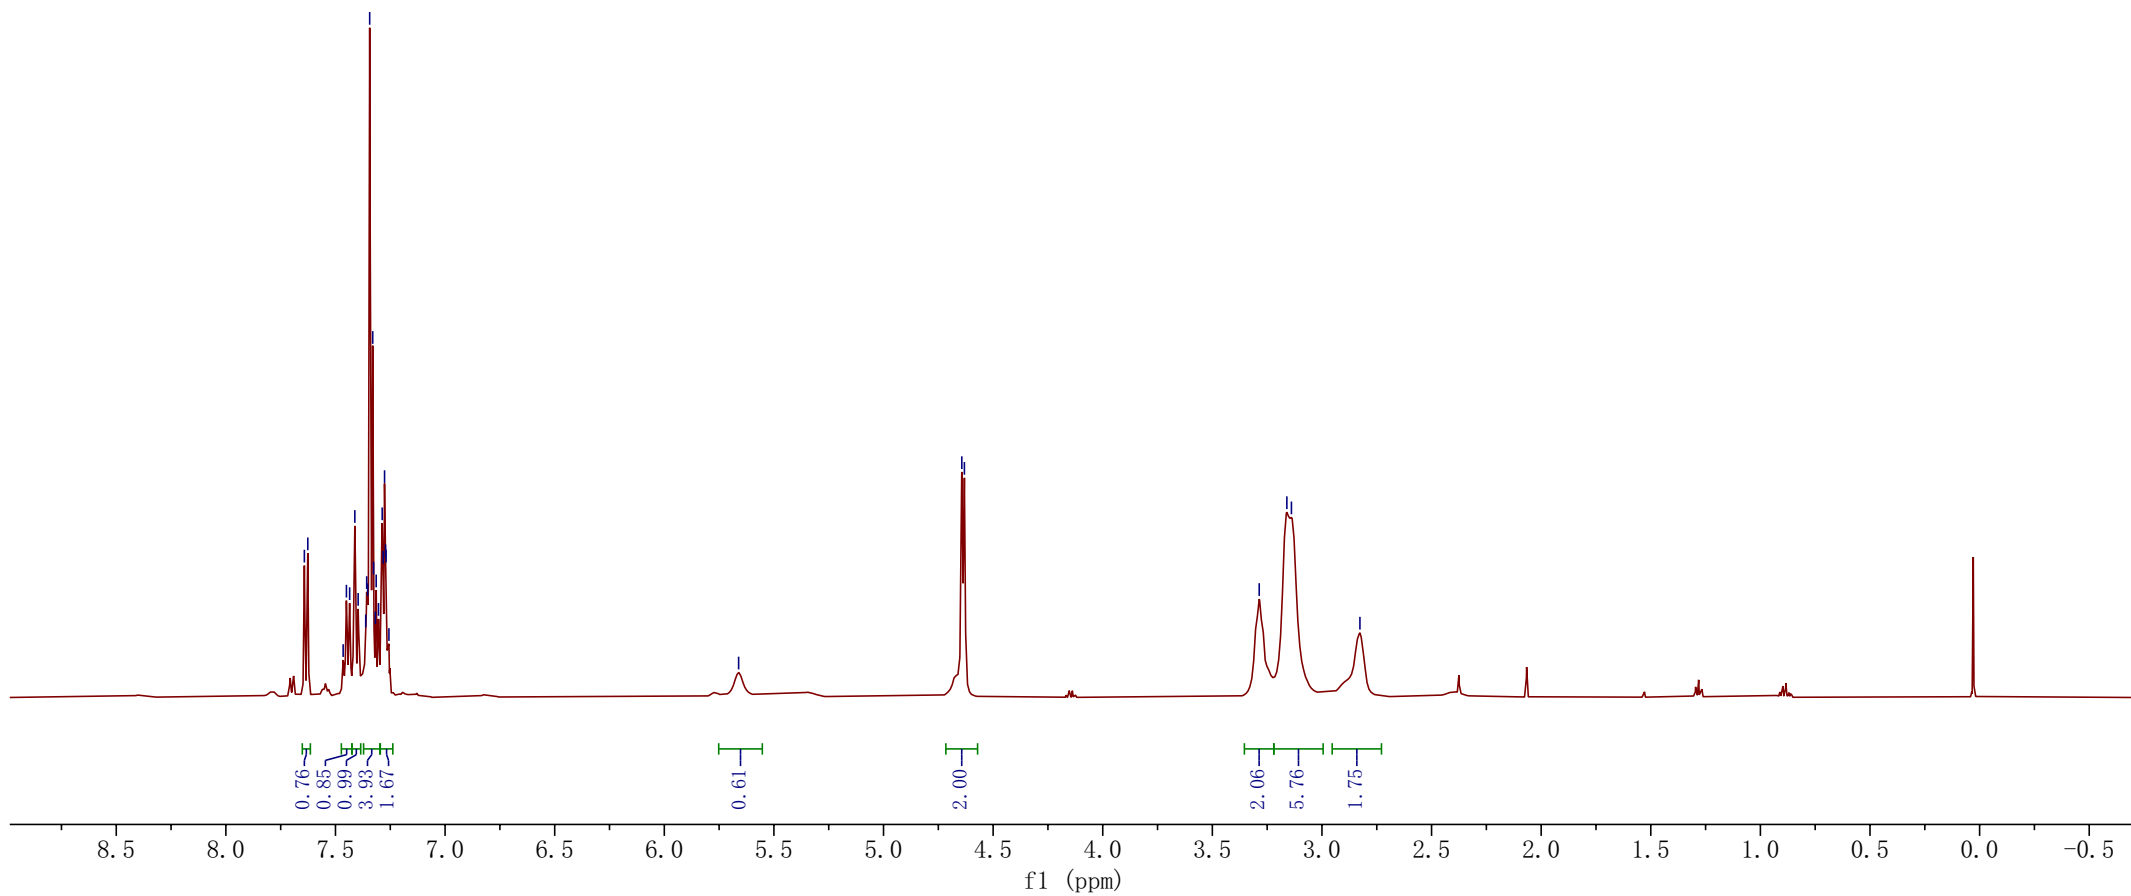

191105  
xzp190604-57

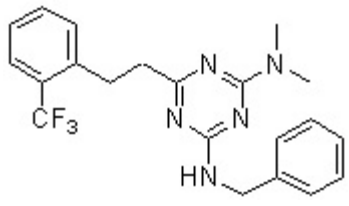

176.8633  
165.0991  
165.0884  
165.0813  
1105  
140.7846  
139.2684  
131.8938  
131.6794  
130.7771  
128.6688  
128.4828  
128.4339  
128.3607  
127.7112  
127.5425  
127.1369  
125.8466  
125.8010  
125.7646  
123.5890

44.6528  
39.7452  
36.0662  
35.9823  
29.6024

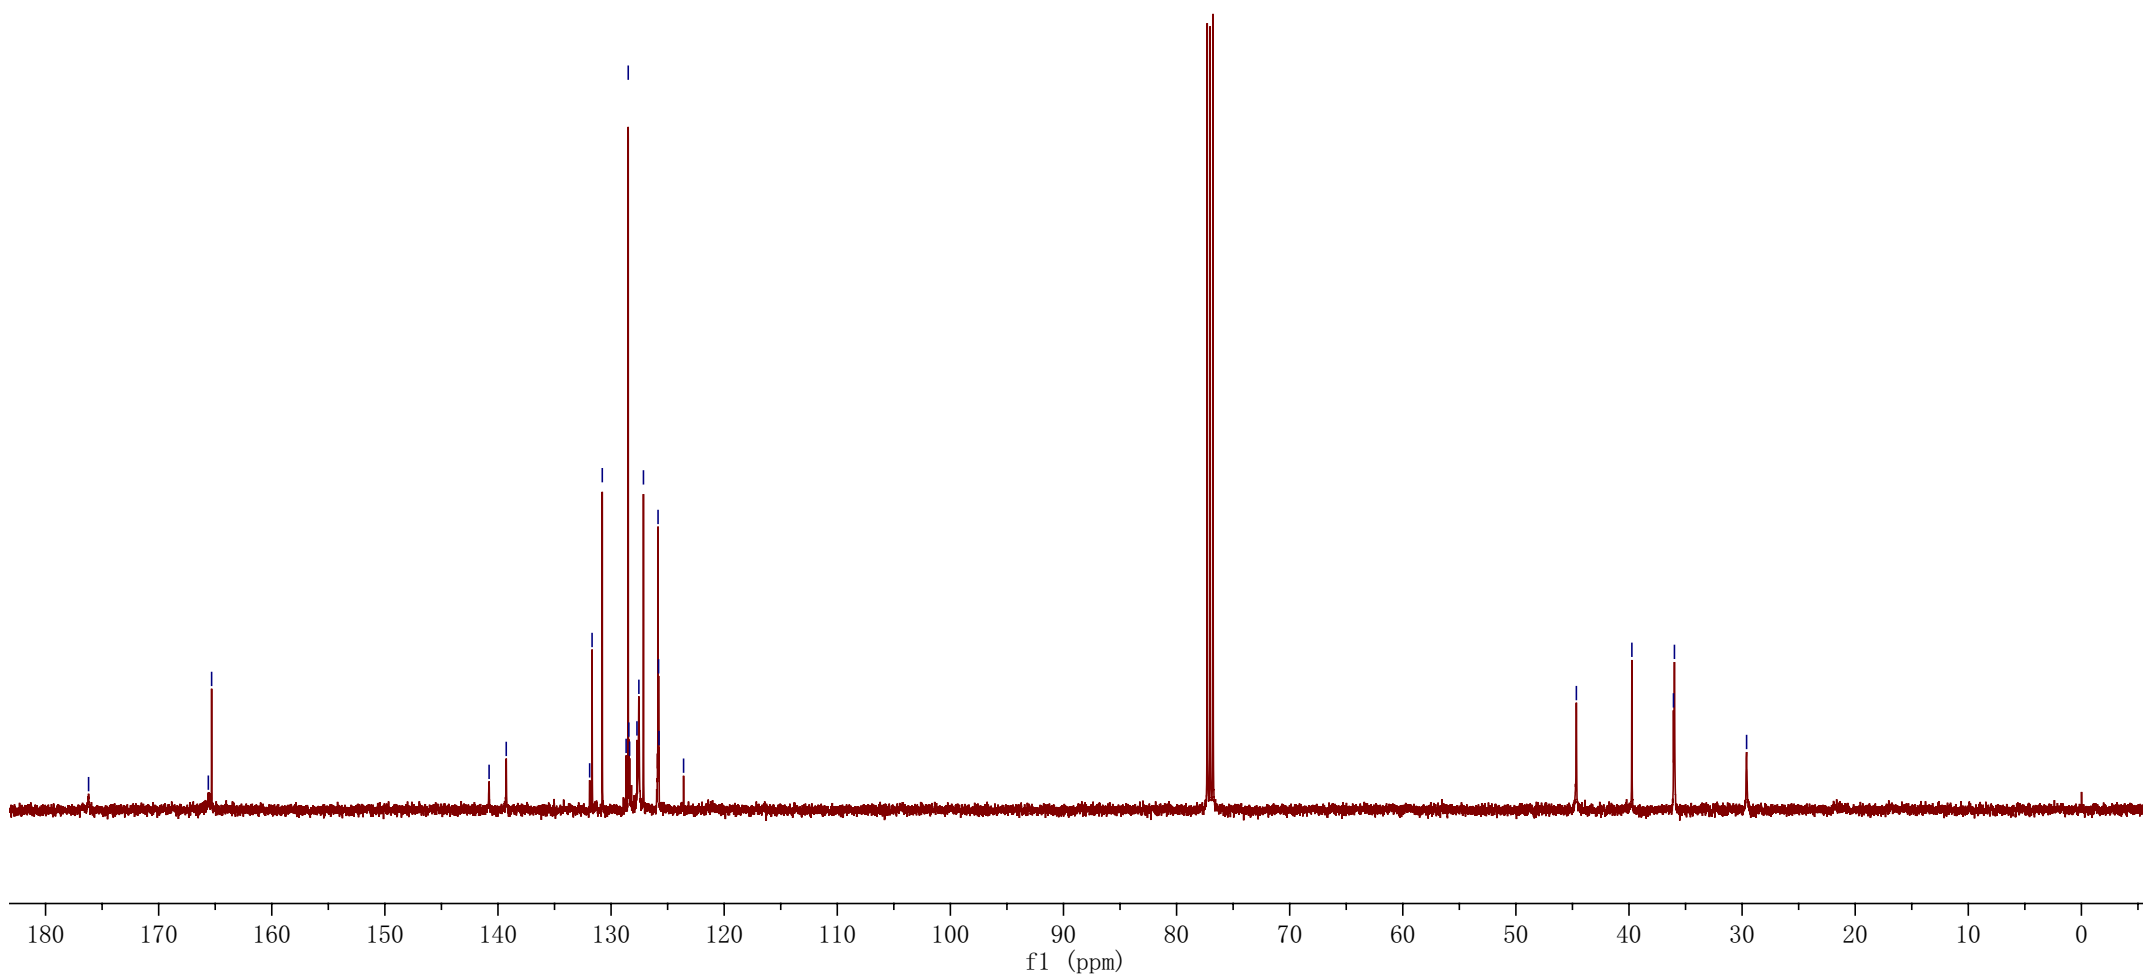

Supplement: d1nj03116c1.pdf [file d1nj03116c1.pdf]
